# Supplementary material for: Parallel Gene Expression Differences between Low and High Latitude Populations of Drosophila melanogaster and D. simulans
Source: PLoS Genet. 2015 May 7;11(5):e1005184. doi: 10.1371/journal.pgen.1005184 (PMC4423912; doi:10.1371/journal.pgen.1005184)
Supplement: S14 Table — A) D. melanogaster Panama vs. Maine at 29°C, B) D. melanogaster Panama vs. Maine at 21°C, C) D. simulans Panama vs. Maine at 29°C and D) D. simulans Panama vs. Maine at 21°C. (XLSX) [file pgen.1005184.s018.xlsx]

## Sheet: Legend
S14 Table. List of introns/splicing junctions showing differential low vs. high latitude usage in D. melanogaster and D. simulans. A) D. melanogaster Panama vs. Maine at 29 °C, B) D. melanogaster Panama vs. Maine at 21 °C, C) D. simulans Panama vs. Maine at 29 °C and D) D. simulans Panama vs. Maine at 21 °C.

## Sheet: Dmel PanvsMaine 29C
Gene_ID	FlyBase intron name	Chromosome	Location_min	Location_max	Log2 fold change	Adjusted P-value	Intron size
FBgn0031263	intron_FBgn0031263:1_FBgn0031263:2	2L	560038	560096	0.574136	0.0340918	59
FBgn0002563	intron_FBgn0002563:1_FBgn0002563:2	2L	898942	899009	-1.76014	0.000561015	68
FBgn0031294	intron_FBgn0031294:4_FBgn0031294:3	2L	1014717	1014776	-0.838519	0.0376765	60
FBgn0031294	intron_FBgn0031294:5_FBgn0031294:4	2L	1014975	1015034	-0.830113	0.048698	60
FBgn0031294	intron_FBgn0031294:7_FBgn0031294:6	2L	1015928	1015992	-0.839892	0.00230215	65
FBgn0031294	intron_FBgn0031294:8_FBgn0031294:7	2L	1016077	1016138	-0.84376	0.00155722	62
FBgn0031294	intron_FBgn0031294:9_FBgn0031294:8	2L	1017642	1017710	-0.926159	6.87506e-05	69
FBgn0031294	intron_FBgn0031294:10_FBgn0031294:9	2L	1017769	1019267	-0.838581	0.00381338	1499
FBgn0031294	intron_FBgn0031294:11_FBgn0031294:10	2L	1019322	1033686	-1.32326	0.00133911	14365
FBgn0031294	intron_FBgn0031294:13_FBgn0031294:11	2L	1034191	1042963	-0.906399	0.0147451	8773
FBgn0031294	intron_FBgn0031294:14_FBgn0031294:11	2L	1034191	1046809	-1.26021	0.00252243	12619
FBgn0031294	intron_FBgn0031294:15_FBgn0031294:14	2L	1047023	1047955	-1.58405	0.00012241	933
FBgn0016926	intron_FBgn0016926:5_FBgn0016926:3	2L	1117517	1118565	0.516279	0.0368336	1049
FBgn0031306	intron_FBgn0031306:2_FBgn0031306:3	2L	1139068	1139123	-1.22648	0.0212476	56
FBgn0031306	intron_FBgn0031306:3_FBgn0031306:4	2L	1139386	1139482	-0.825581	0.0072534	97
FBgn0026141	intron_FBgn0026141:2_FBgn0026141:4	2L	1344516	1344569	0.780779	0.0104346	54
FBgn0051659	intron_FBgn0051659:6_FBgn0051659:4	2L	1359698	1359760	1.05433	0.0489662	63
FBgn0053126	intron_FBgn0053126:8_FBgn0053126:6	2L	1361579	1361640	0.903668	0.00711531	62
FBgn0264494	intron_FBgn0264494:12_FBgn0264494:13	2L	1749677	1749741	0.545092	0.0229453	65
FBgn0051665	intron_FBgn0051665:10_FBgn0051665:11	2L	1853597	1854185	-1.30172	0.0485781	589
FBgn0001125	intron_FBgn0001125:2_FBgn0001125:1	2L	1985402	1985470	-0.718917	4.56117e-10	69
FBgn0040717	intron_FBgn0040717:1_FBgn0040717:3	2L	2008542	2008672	-2.11152	0.034581	131
FBgn0031405	intron_FBgn0031405:1_FBgn0031405:2	2L	2242592	2242692	0.919953	0.015691	101
FBgn0031414	intron_FBgn0031414:6_FBgn0031414:7	2L	2347180	2350758	-1.87761	0.00327153	3579
FBgn0031414	intron_FBgn0031414:12_FBgn0031414:13	2L	2354823	2356430	-0.990247	0.0453193	1608
FBgn0031432	intron_FBgn0031432:3_FBgn0031432:1	2L	2563066	2563132	-0.806676	0.00955923	67
FBgn0031436	intron_FBgn0031436:8_FBgn0031436:5	2L	2579956	2580014	1.6114	0.000150564	59
FBgn0004242	intron_FBgn0004242:6_FBgn0004242:2	2L	2782840	2783040	-1.0158	0.0178851	201
FBgn0004242	intron_FBgn0004242:16_FBgn0004242:14	2L	2792677	2793174	-1.09209	0.00913715	498
FBgn0004242	intron_FBgn0004242:21_FBgn0004242:19	2L	2793909	2798485	-0.847343	0.0450289	4577
FBgn0024947	intron_FBgn0024947:4_FBgn0024947:1	2L	2881321	2881381	0.865085	0.00333912	61
FBgn0014396	intron_FBgn0014396:5_FBgn0014396:3	2L	3499423	3499510	-0.704928	0.0140925	88
FBgn0031544	intron_FBgn0031544:2_FBgn0031544:3	2L	3516269	3516329	0.879875	0.00709239	61
FBgn0000721	intron_FBgn0000721:4_FBgn0000721:3	2L	3623196	3623261	-0.804427	0.0340918	66
FBgn0259951	intron_FBgn0259951:2_FBgn0259951:1	2L	3668418	3668470	-1.06798	2.9794e-05	53
FBgn0040705	intron_FBgn0040705:1_FBgn0040705:2	2L	4454827	4454887	0.848068	0.00217065	61
FBgn0031620	intron_FBgn0031620:1_FBgn0031620:2	2L	4682922	4682976	0.64067	0.0115858	55
FBgn0031645	intron_FBgn0031645:5_FBgn0031645:6	2L	4902594	4902663	1.05107	0.0036492	70
FBgn0053113	intron_FBgn0053113:14_FBgn0053113:13	2L	5004208	5004613	-1.02676	0.0333143	406
FBgn0261608	intron_FBgn0261608:2_FBgn0261608:4	2L	5071031	5071102	-0.707878	0.0304683	72
CG14032	intron_CG14032:4_CG14032:5	2L	5264797	5264855	1.46934	0.00220948	59
FBgn0016076	intron_FBgn0016076:5_FBgn0016076:6	2L	5307913	5308020	1.18974	0.0146309	108
FBgn0014189	intron_FBgn0014189:13_FBgn0014189:11	2L	5541977	5542182	0.720184	0.00642223	206
FBgn0031734	intron_FBgn0031734:7_FBgn0031734:6	2L	5736118	5736181	0.573751	0.0222666	64
FBgn0031741	intron_FBgn0031741:4_FBgn0031741:5	2L	5807618	5807674	1.0303	0.000267216	57
FBgn0031741	intron_FBgn0031741:5_FBgn0031741:6	2L	5808412	5808472	1.29638	0.000134659	61
FBgn0031741	intron_FBgn0031741:6_FBgn0031741:8	2L	5808685	5808744	1.09052	0.00132363	60
FBgn0001942	intron_FBgn0001942:1_FBgn0001942:4	2L	5981836	5983009	1.00778	0.00257916	1174
FBgn0085209	intron_FBgn0085209:1_FBgn0085209:2	2L	6060615	6060667	-0.690203	0.0138784	53
FBgn0015623	intron_FBgn0015623:1_FBgn0015623:4	2L	6339126	6342157	1.03601	0.00346437	3032
FBgn0015623	intron_FBgn0015623:2_FBgn0015623:4	2L	6340055	6342157	0.94355	0.0473653	2103
FBgn0015623	intron_FBgn0015623:3_FBgn0015623:4	2L	6341887	6342157	0.806066	0.0330934	271
FBgn0031826	intron_FBgn0031826:1_FBgn0031826:2	2L	6497724	6497785	0.584814	0.0450026	62
FBgn0031830	intron_FBgn0031830:2_FBgn0031830:3	2L	6558592	6558938	0.826171	0.0385181	347
FBgn0031842	intron_FBgn0031842:5_FBgn0031842:6	2L	6652630	6652752	-0.666188	0.0247901	123
FBgn0015777	intron_FBgn0015777:10_FBgn0015777:5	2L	6791842	6796336	0.579657	0.0391387	4495
FBgn0031860	intron_FBgn0031860:2_FBgn0031860:3	2L	6803523	6803591	0.871757	0.0146661	69
FBgn0002938	intron_FBgn0002938:2_FBgn0002938:3	2L	7377866	7378384	-2.58788	1.76894e-05	519
FBgn0002938	intron_FBgn0002938:3_FBgn0002938:4	2L	7378689	7378783	-1.81173	0.0115858	95
FBgn0002938	intron_FBgn0002938:4_FBgn0002938:5	2L	7379648	7379705	-1.85307	0.00108125	58
FBgn0002938	intron_FBgn0002938:5_FBgn0002938:6	2L	7380644	7380711	-1.49547	1.40932e-05	68
FBgn0002938	intron_FBgn0002938:6_FBgn0002938:7	2L	7381005	7381063	-1.50942	1.30427e-07	59
FBgn0002938	intron_FBgn0002938:9_FBgn0002938:10	2L	7381906	7381960	-0.804813	0.00637822	55
FBgn0002938	intron_FBgn0002938:10_FBgn0002938:12	2L	7382059	7382121	-0.648683	0.0149013	63
FBgn0002938	intron_FBgn0002938:11_FBgn0002938:15	2L	7382176	7382757	-1.52546	0.00022022	582
FBgn0002938	intron_FBgn0002938:15_FBgn0002938:16	2L	7382946	7383010	-0.997214	0.00173626	65
FBgn0002938	intron_FBgn0002938:16_FBgn0002938:17	2L	7383427	7383478	-0.695317	0.000150564	52
FBgn0002938	intron_FBgn0002938:17_FBgn0002938:18	2L	7383756	7383806	-0.958034	0.000250027	51
FBgn0264087	intron_FBgn0264087:13_FBgn0264087:12	2L	7651475	7651535	-1.37839	0.000953445	61
FBgn0011230	intron_FBgn0011230:8_FBgn0011230:7	2L	8061259	8061307	-0.777498	0.0279071	49
FBgn0261822	intron_FBgn0261822:3_FBgn0261822:7	2L	8088454	8089184	-0.825304	0.00124517	731
FBgn0031987	intron_FBgn0031987:2_FBgn0031987:1	2L	8126699	8126756	-1.40026	0.0009621	58
FBgn0264953	intron_FBgn0264953:37_FBgn0264953:38	2L	8188878	8188931	0.871937	0.0429833	54
FBgn0032004	intron_FBgn0032004:2_FBgn0032004:1	2L	8217625	8217686	0.795405	0.0115838	62
FBgn0032006	intron_FBgn0032006:7_FBgn0032006:6	2L	8222831	8222891	1.36066	0.00692538	61
FBgn0260439	intron_FBgn0260439:4_FBgn0260439:6	2L	8366395	8367095	0.624567	0.0178851	701
FBgn0032087	intron_FBgn0032087:1_FBgn0032087:2	2L	9010718	9010778	-0.664788	7.73415e-05	61
FBgn0028433	intron_FBgn0028433:1_FBgn0028433:7	2L	9256697	9272465	-2.12077	9.73293e-07	15769
FBgn0028433	intron_FBgn0028433:3_FBgn0028433:7	2L	9257207	9272465	-1.1909	1.42385e-08	15259
FBgn0012036	intron_FBgn0012036:2_FBgn0012036:3	2L	9387891	9389828	0.521236	0.0127199	1938
FBgn0028704	intron_FBgn0028704:9_FBgn0028704:7	2L	9722943	9727027	-1.09639	0.0358144	4085
FBgn0028704	intron_FBgn0028704:11_FBgn0028704:9	2L	9727257	9732954	-1.09038	0.049776	5698
FBgn0028704	intron_FBgn0028704:13_FBgn0028704:11	2L	9733533	9742374	-1.077	0.00680591	8842
FBgn0042174	intron_FBgn0042174:6_FBgn0042174:4	2L	9789616	9789790	-0.705414	0.00266305	175
FBgn0029174	intron_FBgn0029174:1_FBgn0029174:3	2L	9888339	9888403	0.981561	0.00358025	65
FBgn0032156	intron_FBgn0032156:3_FBgn0032156:2	2L	9903942	9904003	1.23655	4.00199e-06	62
FBgn0032156	intron_FBgn0032156:10_FBgn0032156:9	2L	9906444	9907050	0.669578	0.00864753	607
FBgn0011272	intron_FBgn0011272:2_FBgn0011272:4	2L	9967359	9967616	1.16923	0.00257916	258
FBgn0011823	intron_FBgn0011823:3_FBgn0011823:4	2L	10058135	10058198	0.73503	0.0198683	64
FBgn0005593	intron_FBgn0005593:1_FBgn0005593:3	2L	10201149	10201229	-0.563246	0.0280756	81
FBgn0024320	intron_FBgn0024320:15_FBgn0024320:13	2L	10218890	10220692	1.26342	0.0101167	1803
FBgn0032200	intron_FBgn0032200:3_FBgn0032200:2	2L	10255271	10255720	0.594655	0.0136506	450
FBgn0032202	intron_FBgn0032202:1_FBgn0032202:2	2L	10264265	10264548	-1.16978	0.014463	284
FBgn0032208	intron_FBgn0032208:2_FBgn0032208:1	2L	10282280	10282344	1.0204	0.000242673	65
FBgn0032218	intron_FBgn0032218:5_FBgn0032218:4	2L	10319424	10319487	0.866739	0.00577667	64
FBgn0032218	intron_FBgn0032218:6_FBgn0032218:5	2L	10319561	10319617	1.34773	0.036912	57
FBgn0032221	intron_FBgn0032221:8_FBgn0032221:7	2L	10330593	10331079	-1.23452	0.0152936	487
FBgn0032240	intron_FBgn0032240:3_FBgn0032240:2	2L	10403829	10403890	0.942485	0.0268801	62
FBgn0027611	intron_FBgn0027611:9_FBgn0027611:10	2L	10461281	10461342	-0.820136	0.0100029	62
FBgn0021953	intron_FBgn0021953:3_FBgn0021953:1	2L	10512609	10512667	0.659887	0.0257572	59
FBgn0051872	intron_FBgn0051872:2_FBgn0051872:3	2L	10642717	10642783	0.660478	0.0427912	67
FBgn0032275	intron_FBgn0032275:3_FBgn0032275:4	2L	10649282	10649439	0.681313	0.0400331	158
FBgn0026147	intron_FBgn0026147:10_FBgn0026147:11	2L	10993435	10993502	0.637505	0.0374489	68
FBgn0032345	intron_FBgn0032345:2_FBgn0032345:1	2L	11121299	11121418	0.729591	0.0254296	120
FBgn0040233	intron_FBgn0040233:13_FBgn0040233:14	2L	11277376	11277440	0.803211	0.0429833	65
FBgn0032382	intron_FBgn0032382:2_FBgn0032382:4	2L	11851552	11851617	-0.750999	0.00195455	66
FBgn0032382	intron_FBgn0032382:6_FBgn0032382:8	2L	11852222	11852377	-0.79564	0.0297064	156
FBgn0014019	intron_FBgn0014019:3_FBgn0014019:4	2L	12009090	12009139	-1.479	0.00411763	50
FBgn0032397	intron_FBgn0032397:6_FBgn0032397:3	2L	12038171	12038371	0.774515	0.00380779	201
FBgn0000114	intron_FBgn0000114:3_FBgn0000114:5	2L	12206131	12240867	0.823513	0.0014131	34737
FBgn0000114	intron_FBgn0000114:22_FBgn0000114:24	2L	12312466	12312525	1.1526	0.00417422	60
FBgn0040508	intron_FBgn0040508:2_FBgn0040508:3	2L	12912889	12912944	1.08745	0.0391387	56
FBgn0053306	intron_FBgn0053306:2_FBgn0053306:1	2L	13843573	13843627	-0.751239	0.0138784	55
FBgn0028534	intron_FBgn0028534:1_FBgn0028534:2	2L	13846884	13846953	-0.560296	0.0221791	70
FBgn0028533	intron_FBgn0028533:1_FBgn0028533:3	2L	13848107	13848251	-0.616323	0.00415606	145
FBgn0045842	intron_FBgn0045842:5_FBgn0045842:4	2L	15258710	15258781	1.06719	1.6287e-05	72
FBgn0045842	intron_FBgn0045842:8_FBgn0045842:5	2L	15258939	15261717	0.817834	0.000258808	2779
FBgn0028863	intron_FBgn0028863:5_FBgn0028863:4	2L	15648466	15648534	-1.17363	0.0158755	69
FBgn0028856	intron_FBgn0028856:3_FBgn0028856:4	2L	15958133	15958185	0.92452	0.0393212	53
FBgn0000182	intron_FBgn0000182:12_FBgn0000182:13	2L	16047730	16047957	1.7763	0.000912142	228
FBgn0000339	intron_FBgn0000339:3_FBgn0000339:1	2L	16309931	16309999	0.636605	0.0203605	69
FBgn0051816	intron_FBgn0051816:1_FBgn0051816:2	2L	16542784	16542992	0.999197	0.0271518	209
FBgn0266492	intron_FBgn0266492:2_FBgn0266492:3	2L	16838664	16839212	0.975501	0.0165433	549
FBgn0000120	intron_FBgn0000120:1_FBgn0000120:3	2L	18078497	18078915	-1.57137	4.88139e-15	419
FBgn0032699	intron_FBgn0032699:2_FBgn0032699:1	2L	18692181	18692244	0.799451	0.0117138	64
FBgn0032732	intron_FBgn0032732:2_FBgn0032732:3	2L	18987989	18988056	0.990069	0.0144444	68
FBgn0002031	intron_FBgn0002031:4_FBgn0002031:2	2L	19123557	19123756	0.962321	0.00461601	200
FBgn0040994	intron_FBgn0040994:3_FBgn0040994:1	2L	19183339	19183391	0.708787	0.0213694	53
FBgn0040994	intron_FBgn0040994:5_FBgn0040994:3	2L	19183453	19183511	1.57892	0.000250027	59
FBgn0041789	intron_FBgn0041789:4_FBgn0041789:3	2L	19404683	19404749	1.36578	0.00383667	67
FBgn0032797	intron_FBgn0032797:4_FBgn0032797:2	2L	19510731	19510786	-0.650484	0.0200082	56
FBgn0032797	intron_FBgn0032797:8_FBgn0032797:7	2L	19511739	19511796	-0.825486	0.0429535	58
FBgn0032797	intron_FBgn0032797:19_FBgn0032797:18	2L	19516034	19516440	-0.741681	0.0107318	407
FBgn0032833	intron_FBgn0032833:1_FBgn0032833:5	2L	19958765	19959266	0.917151	0.0305045	502
FBgn0032833	intron_FBgn0032833:2_FBgn0032833:5	2L	19958769	19959266	1.07624	0.0115435	498
FBgn0032836	intron_FBgn0032836:6_FBgn0032836:8	2L	19965011	19965062	0.572917	0.0355113	52
FBgn0040996	intron_FBgn0040996:1_FBgn0040996:3	2L	20294788	20294877	1.22215	0.00416961	90
FBgn0032889	intron_FBgn0032889:2_FBgn0032889:11	2L	20824494	20825667	-1.08446	0.0197873	1174
FBgn0032901	intron_FBgn0032901:3_FBgn0032901:2	2L	20873891	20873956	0.892772	0.00913667	66
FBgn0032901	intron_FBgn0032901:17_FBgn0032901:13	2L	20882465	20903015	-0.744847	0.0130398	20551
FBgn0040297	intron_FBgn0040297:29_FBgn0040297:34	2L	21129083	21132033	-1.09037	0.048698	2951
FBgn0000370	intron_FBgn0000370:3_FBgn0000370:4	2L	21312044	21312097	1.15427	0.000161589	54
FBgn0032946	intron_FBgn0032946:9_FBgn0032946:10	2L	21388670	21388731	-0.38693	0.00594313	62
FBgn0032956	intron_FBgn0032956:8_FBgn0032956:9	2L	21662453	21662517	0.615038	0.0196708	65
FBgn0000559	intron_FBgn0000559:6_FBgn0000559:5	2L	21681559	21682038	0.729068	0.0103517	480
FBgn0086779	intron_FBgn0086779:8_FBgn0086779:7	2L	21742876	21742972	0.997554	0.0370919	97
FBgn0040011	intron_FBgn0040011:4_FBgn0040011:5	2L	22477415	22477473	0.572998	0.0335519	59
FBgn0026401	intron_FBgn0026401:4_FBgn0026401:3	2R	579752	579800	0.741884	0.0233488	49
FBgn0259978	intron_FBgn0259978:12_FBgn0259978:13	2R	1591888	1591939	0.807591	0.036579	52
FBgn0033048	intron_FBgn0033048:4_FBgn0033048:3	2R	1850736	1854195	1.28495	0.000258808	3460
FBgn0033079	intron_FBgn0033079:2_FBgn0033079:1	2R	2530389	2530507	-0.668933	0.0178702	119
FBgn0000473	intron_FBgn0000473:2_FBgn0000473:1	2R	2667767	2667835	-0.805141	0.0009621	69
FBgn0028985	intron_FBgn0028985:7_FBgn0028985:6	2R	2764628	2764725	1.07904	0.00963115	98
FBgn0050157	intron_FBgn0050157:2_FBgn0050157:1	2R	2861734	2861795	0.848023	0.0251756	62
FBgn0033124	intron_FBgn0033124:2_FBgn0033124:3	2R	2895423	2895485	-2.06041	0.00455141	63
FBgn0029507	intron_FBgn0029507:2_FBgn0029507:1	2R	2897551	2897607	-0.611728	0.0146661	57
FBgn0029506	intron_FBgn0029506:1_FBgn0029506:3	2R	2899841	2900537	0.683339	0.0138363	697
FBgn0029506	intron_FBgn0029506:3_FBgn0029506:4	2R	2900622	2904517	0.749615	0.00777786	3896
FBgn0010548	intron_FBgn0010548:17_FBgn0010548:15	2R	3361349	3361420	0.655751	0.0280756	72
FBgn0033203	intron_FBgn0033203:1_FBgn0033203:3	2R	3549622	3549670	-0.842179	0.021628	49
FBgn0033224	intron_FBgn0033224:4_FBgn0033224:3	2R	3690707	3691016	1.22541	0.00221241	310
FBgn0033274	intron_FBgn0033274:3_FBgn0033274:2	2R	4060875	4060984	0.41121	0.0440674	110
FBgn0002569	intron_FBgn0002569:1_FBgn0002569:2	2R	4342656	4342716	-0.679138	0.00717074	61
FBgn0050359	intron_FBgn0050359:7_FBgn0050359:8	2R	4352105	4352157	0.843317	0.000891749	53
FBgn0050359	intron_FBgn0050359:8_FBgn0050359:9	2R	4352302	4352368	0.390219	0.0489662	67
FBgn0033296	intron_FBgn0033296:2_FBgn0033296:1	2R	4357139	4357215	-0.433383	0.0420522	77
FBgn0050355	intron_FBgn0050355:2_FBgn0050355:1	2R	4566942	4566998	0.689241	0.0134095	57
FBgn0263120	intron_FBgn0263120:18_FBgn0263120:19	2R	4568891	4568955	0.748866	0.0303121	65
FBgn0011286	intron_FBgn0011286:37_FBgn0011286:38	2R	4772308	4772375	0.709439	0.0305885	68
FBgn0010114	intron_FBgn0010114:5_FBgn0010114:4	2R	5117592	5117816	-0.816224	0.0176828	225
FBgn0015037	intron_FBgn0015037:7_FBgn0015037:8	2R	5129325	5129386	-0.688903	0.0152936	62
FBgn0040775	intron_FBgn0040775:2_FBgn0040775:1	2R	5250287	5250340	0.914928	0.0252794	54
FBgn0028473	intron_FBgn0028473:3_FBgn0028473:1	2R	5285620	5285688	-0.588214	0.00858359	69
FBgn0016078	intron_FBgn0016078:6_FBgn0016078:5	2R	5291431	5291811	0.897134	0.0312848	381
FBgn0005614	intron_FBgn0005614:4_FBgn0005614:5	2R	5643265	5643542	-1.54338	0.00229636	278
FBgn0005614	intron_FBgn0005614:5_FBgn0005614:6	2R	5643689	5647281	-1.46809	0.00151929	3593
FBgn0005614	intron_FBgn0005614:6_FBgn0005614:7	2R	5647520	5648916	-1.37696	0.000139211	1397
FBgn0005614	intron_FBgn0005614:7_FBgn0005614:8	2R	5649060	5649120	-1.6587	3.34197e-05	61
FBgn0005614	intron_FBgn0005614:8_FBgn0005614:9	2R	5649494	5649546	-0.972704	0.0453283	53
FBgn0005614	intron_FBgn0005614:9_FBgn0005614:10	2R	5649782	5650227	-1.92261	7.7335e-08	446
FBgn0005614	intron_FBgn0005614:10_FBgn0005614:11	2R	5650502	5650562	-1.05552	0.000258808	61
FBgn0005614	intron_FBgn0005614:12_FBgn0005614:13	2R	5651231	5651293	-1.03573	1.53638e-06	63
FBgn0005614	intron_FBgn0005614:14_FBgn0005614:15	2R	5651827	5651881	-0.721608	0.0340918	55
FBgn0033446	intron_FBgn0033446:4_FBgn0033446:3	2R	5700170	5700228	-0.848075	0.0247901	59
FBgn0033448	intron_FBgn0033448:4_FBgn0033448:1	2R	5717365	5721013	0.944313	0.0420234	3649
FBgn0033460	intron_FBgn0033460:9_FBgn0033460:8	2R	5767140	5767200	0.634868	0.0229453	61
FBgn0050008	intron_FBgn0050008:1_FBgn0050008:2	2R	5777501	5777556	0.658911	0.0152936	56
FBgn0050008	intron_FBgn0050008:2_FBgn0050008:3	2R	5777666	5777791	1.16786	0.000137534	126
FBgn0022382	intron_FBgn0022382:10_FBgn0022382:9	2R	5887031	5887238	4.21951	6.99676e-13	208
FBgn0033476	intron_FBgn0033476:9_FBgn0033476:7	2R	5927355	5935755	1.19183	0.00444121	8401
FBgn0265342	intron_FBgn0265342:2_FBgn0265342:3	2R	5938255	5938310	0.851172	0.0351648	56
FBgn0033484	intron_FBgn0033484:7_FBgn0033484:8	2R	5982140	5982200	-0.78652	0.0232406	61
FBgn0033504	intron_FBgn0033504:23_FBgn0033504:24	2R	6183300	6183373	0.688991	0.00439563	74
FBgn0261862	intron_FBgn0261862:3_FBgn0261862:2	2R	6357811	6357872	0.995131	0.0125367	62
FBgn0033543	intron_FBgn0033543:4_FBgn0033543:3	2R	6618114	6618178	-0.499061	0.0427912	65
FBgn0033570	intron_FBgn0033570:3_FBgn0033570:1	2R	6784923	6784976	-0.422882	0.0482427	54
FBgn0033574	intron_FBgn0033574:3_FBgn0033574:2	2R	6828157	6828214	0.720059	0.0429833	58
FBgn0050489	intron_FBgn0050489:2_FBgn0050489:1	2R	7008631	7008694	-1.17743	0.000541223	64
FBgn0050489	intron_FBgn0050489:3_FBgn0050489:2	2R	7008812	7008865	-1.10836	0.0151888	54
FBgn0053503	intron_FBgn0053503:2_FBgn0053503:1	2R	7012397	7012460	-1.01048	0.0073195	64
FBgn0053503	intron_FBgn0053503:3_FBgn0053503:2	2R	7012578	7012631	-1.31454	0.000399921	54
FBgn0086677	intron_FBgn0086677:3_FBgn0086677:1	2R	7980174	7980251	-1.00595	0.0326946	78
FBgn0085261	intron_FBgn0085261:3_FBgn0085261:1	2R	8052999	8053127	-0.908013	0.0484086	129
FBgn0025454	intron_FBgn0025454:1_FBgn0025454:3	2R	8073331	8073909	-0.845604	0.00519627	579
FBgn0025454	intron_FBgn0025454:2_FBgn0025454:4	2R	8074408	8074472	-0.844239	0.00123071	65
FBgn0025454	intron_FBgn0025454:4_FBgn0025454:5	2R	8075274	8075333	-0.583888	0.0122075	60
FBgn0000253	intron_FBgn0000253:1_FBgn0000253:3	2R	8146964	8147544	-0.87487	0.00995153	581
FBgn0004435	intron_FBgn0004435:10_FBgn0004435:12	2R	8504447	8504960	-0.757407	0.00220897	514
FBgn0004435	intron_FBgn0004435:14_FBgn0004435:15	2R	8505646	8505708	-0.656269	0.00679441	63
FBgn0033777	intron_FBgn0033777:8_FBgn0033777:4	2R	8737734	8742587	-1.14164	0.0185315	4854
FBgn0013305	intron_FBgn0013305:11_FBgn0013305:5	2R	8766728	8767193	0.911666	0.0274508	466
FBgn0085264	intron_FBgn0085264:7_FBgn0085264:6	2R	9098647	9098711	1.00232	0.0229453	65
FBgn0033807	intron_FBgn0033807:6_FBgn0033807:4	2R	9101437	9101923	0.771973	0.00439563	487
FBgn0002789	intron_FBgn0002789:1_FBgn0002789:2	2R	9134278	9134421	0.816679	0.00184285	144
FBgn0259219	intron_FBgn0259219:4_FBgn0259219:6	2R	9150088	9150147	1.44236	5.26076e-07	60
FBgn0261041	intron_FBgn0261041:4_FBgn0261041:5	2R	9695342	9695403	-1.81672	0.000432497	62
FBgn0261041	intron_FBgn0261041:12_FBgn0261041:13	2R	9701386	9701445	-1.18432	0.0251654	60
FBgn0261041	intron_FBgn0261041:25_FBgn0261041:26	2R	9705115	9705392	-1.14333	0.0179727	278
FBgn0033872	intron_FBgn0033872:8_FBgn0033872:11	2R	9718224	9718282	-0.681083	0.0123433	59
FBgn0033873	intron_FBgn0033873:2_FBgn0033873:1	2R	9722352	9722471	-1.11894	0.0391387	120
FBgn0033876	intron_FBgn0033876:2_FBgn0033876:1	2R	9730842	9731044	-0.787439	0.00352889	203
FBgn0013770	intron_FBgn0013770:1_FBgn0013770:3	2R	9848382	9849724	1.05883	0.000584679	1343
FBgn0033907	intron_FBgn0033907:3_FBgn0033907:1	2R	10060809	10060873	0.72265	0.0239953	65
FBgn0001220	intron_FBgn0001220:6_FBgn0001220:5	2R	10143221	10143338	0.818765	0.0247901	118
FBgn0033918	intron_FBgn0033918:1_FBgn0033918:2	2R	10144227	10144291	0.704759	0.024027	65
FBgn0033955	intron_FBgn0033955:1_FBgn0033955:3	2R	10555944	10556003	1.07155	0.0354432	60
FBgn0033958	intron_FBgn0033958:6_FBgn0033958:5	2R	10631698	10632702	-1.15539	0.0440613	1005
FBgn0033978	intron_FBgn0033978:1_FBgn0033978:2	2R	10764453	10764517	0.831444	0.0334713	65
FBgn0033981	intron_FBgn0033981:2_FBgn0033981:1	2R	10773222	10773274	1.63845	0.000150564	53
FBgn0262547	intron_FBgn0262547:2_FBgn0262547:1	2R	10900868	10900938	1.2162	0.00177272	71
FBgn0013467	intron_FBgn0013467:4_FBgn0013467:5	2R	11052606	11068017	-0.995961	0.00124517	15412
FBgn0034072	intron_FBgn0034072:3_FBgn0034072:1	2R	11970899	11970954	1.22189	0.00194735	56
FBgn0034091	intron_FBgn0034091:7_FBgn0034091:6	2R	12093325	12093405	0.647949	0.0388415	81
FBgn0034091	intron_FBgn0034091:9_FBgn0034091:7	2R	12093585	12093676	0.662897	0.0218471	92
FBgn0029153	intron_FBgn0029153:8_FBgn0029153:7	2R	12305210	12305269	0.844552	0.0472241	60
FBgn0034138	intron_FBgn0034138:6_FBgn0034138:4	2R	12458511	12458693	0.918545	0.000955019	183
FBgn0034140	intron_FBgn0034140:4_FBgn0034140:1	2R	12462805	12463777	-1.16195	0.00114038	973
FBgn0024315	intron_FBgn0024315:3_FBgn0024315:2	2R	12544072	12544135	-0.515504	0.0161991	64
FBgn0034153	intron_FBgn0034153:2_FBgn0034153:1	2R	12636829	12636884	-0.686457	0.0324829	56
FBgn0034155	intron_FBgn0034155:21_FBgn0034155:19	2R	12648220	12649172	-1.42469	0.0224319	953
FBgn0034155	intron_FBgn0034155:22_FBgn0034155:21	2R	12649313	12649374	-1.26727	0.0227355	62
FBgn0025827	intron_FBgn0025827:1_FBgn0025827:2	2R	12759881	12759937	-1.03357	0.0244203	57
FBgn0004784	intron_FBgn0004784:1_FBgn0004784:2	2R	12786428	12786588	-1.76261	0.0268801	161
FBgn0004784	intron_FBgn0004784:3_FBgn0004784:4	2R	12786870	12786929	-1.43212	0.00421379	60
FBgn0004784	intron_FBgn0004784:4_FBgn0004784:5	2R	12787059	12787119	-1.80819	6.00758e-05	61
FBgn0004784	intron_FBgn0004784:6_FBgn0004784:7	2R	12787566	12787619	-1.13251	0.0135589	54
FBgn0004784	intron_FBgn0004784:7_FBgn0004784:8	2R	12788018	12788080	-1.13602	0.00158442	63
FBgn0004784	intron_FBgn0004784:10_FBgn0004784:11	2R	12788729	12788789	-0.446523	0.0391387	61
FBgn0034267	intron_FBgn0034267:8_FBgn0034267:10	2R	13620085	13620142	1.48793	0.00151929	58
FBgn0027572	intron_FBgn0027572:7_FBgn0027572:8	2R	13651557	13651615	0.866481	0.0289266	59
FBgn0034330	intron_FBgn0034330:1_FBgn0034330:2	2R	14272200	14272263	-1.15364	0.0115435	64
FBgn0034331	intron_FBgn0034331:3_FBgn0034331:2	2R	14272964	14273018	-0.933412	0.0363741	55
FBgn0040735	intron_FBgn0040735:1_FBgn0040735:2	2R	14276669	14276734	-1.04411	4.93165e-05	66
FBgn0262103	intron_FBgn0262103:17_FBgn0262103:18	2R	14591385	14591496	-0.858929	0.0489815	112
FBgn0034389	intron_FBgn0034389:8_FBgn0034389:10	2R	14659397	14659459	-1.27464	0.0176347	63
FBgn0034394	intron_FBgn0034394:2_FBgn0034394:1	2R	14696282	14696394	-0.639764	0.0247901	113
FBgn0034398	intron_FBgn0034398:2_FBgn0034398:1	2R	14721290	14721469	-0.604284	0.00128354	180
FBgn0034400	intron_FBgn0034400:2_FBgn0034400:1	2R	14725074	14725138	1.13364	0.0306004	65
FBgn0034420	intron_FBgn0034420:4_FBgn0034420:5	2R	15057912	15058122	0.808707	0.0464158	211
FBgn0034435	intron_FBgn0034435:7_FBgn0034435:8	2R	15231551	15231728	0.852842	0.00637822	178
FBgn0034438	intron_FBgn0034438:2_FBgn0034438:1	2R	15255152	15255212	1.03137	0.048698	61
FBgn0034438	intron_FBgn0034438:9_FBgn0034438:8	2R	15257242	15257302	1.20759	0.00455141	61
FBgn0261439	intron_FBgn0261439:2_FBgn0261439:1	2R	15280084	15280143	0.953625	0.000390102	60
FBgn0013325	intron_FBgn0013325:1_FBgn0013325:2	2R	15329883	15329947	1.14599	0.042558	65
FBgn0262966	intron_FBgn0262966:1_FBgn0262966:2	2R	15525121	15525188	1.18157	0.0499279	68
FBgn0261581	intron_FBgn0261581:5_FBgn0261581:4	2R	15833884	15833934	0.824781	0.0427096	51
FBgn0034478	intron_FBgn0034478:1_FBgn0034478:2	2R	15838981	15839032	1.03889	0.0146843	52
FBgn0034491	intron_FBgn0034491:5_FBgn0034491:6	2R	16148252	16148311	0.824413	0.0192783	60
FBgn0034501	intron_FBgn0034501:3_FBgn0034501:1	2R	16197252	16197317	0.494282	0.0464158	66
FBgn0034546	intron_FBgn0034546:3_FBgn0034546:2	2R	16616034	16616081	1.09647	5.81746e-05	48
FBgn0016984	intron_FBgn0016984:3_FBgn0016984:2	2R	16717899	16719288	0.987625	0.00696934	1390
FBgn0261394	intron_FBgn0261394:1_FBgn0261394:2	2R	16882499	16882607	0.513027	0.0288211	109
FBgn0034646	intron_FBgn0034646:2_FBgn0034646:1	2R	17546981	17547029	0.754208	0.00658557	49
FBgn0027360	intron_FBgn0027360:4_FBgn0027360:2	2R	17578506	17578576	0.975606	0.00688068	71
FBgn0010228	intron_FBgn0010228:3_FBgn0010228:1	2R	17585810	17585892	-0.673464	0.000445251	83
FBgn0050395	intron_FBgn0050395:8_FBgn0050395:9	2R	17654434	17654486	0.853442	0.0268801	53
FBgn0050395	intron_FBgn0050395:13_FBgn0050395:14	2R	17655240	17655295	1.32144	0.000554781	56
FBgn0050395	intron_FBgn0050395:24_FBgn0050395:25	2R	17656821	17656875	0.809303	0.0331043	55
FBgn0050395	intron_FBgn0050395:26_FBgn0050395:27	2R	17657212	17657271	1.26476	0.000438063	60
FBgn0054040	intron_FBgn0054040:2_FBgn0054040:1	2R	17720600	17720670	-1.2398	0.000244071	71
FBgn0034740	intron_FBgn0034740:1_FBgn0034740:2	2R	18538317	18538374	0.995393	0.0282769	58
FBgn0034740	intron_FBgn0034740:4_FBgn0034740:5	2R	18539137	18539263	1.2367	0.000183665	127
FBgn0001263	intron_FBgn0001263:3_FBgn0001263:2	2R	18743844	18743903	-0.635535	0.0369037	60
FBgn0001263	intron_FBgn0001263:4_FBgn0001263:3	2R	18744044	18744100	-0.806631	0.00901457	57
FBgn0001263	intron_FBgn0001263:5_FBgn0001263:4	2R	18744213	18744271	-1.18656	0.0038371	59
FBgn0001263	intron_FBgn0001263:7_FBgn0001263:6	2R	18744917	18744978	-1.32268	0.00122949	62
FBgn0001263	intron_FBgn0001263:9_FBgn0001263:7	2R	18745070	18745123	-1.99156	0.000112363	54
FBgn0001263	intron_FBgn0001263:10_FBgn0001263:8	2R	18745699	18746084	-1.46848	0.00294108	386
FBgn0034789	intron_FBgn0034789:1_FBgn0034789:2	2R	18762640	18762951	-1.54756	0.038709	312
FBgn0050192	intron_FBgn0050192:1_FBgn0050192:2	2R	19026301	19026366	1.23102	0.00151886	66
FBgn0250838	intron_FBgn0250838:4_FBgn0250838:2	2R	19273841	19273919	1.58377	1.01619e-06	79
FBgn0034860	intron_FBgn0034860:2_FBgn0034860:1	2R	19300318	19300536	-0.705865	0.0183256	219
FBgn0262728	intron_FBgn0262728:2_FBgn0262728:3	2R	19576234	19576455	-1.06872	0.00658557	222
FBgn0262728	intron_FBgn0262728:4_FBgn0262728:5	2R	19576830	19576891	-1.08313	0.000244071	62
FBgn0262728	intron_FBgn0262728:5_FBgn0262728:6	2R	19576980	19577036	-0.765826	0.0188723	57
FBgn0262728	intron_FBgn0262728:6_FBgn0262728:7	2R	19577137	19577192	-1.1034	0.0229453	56
FBgn0021895	intron_FBgn0021895:3_FBgn0021895:2	2R	19738391	19738456	-0.738071	0.04849	66
FBgn0025352	intron_FBgn0025352:3_FBgn0025352:2	2R	19755518	19755575	0.548368	0.0346347	58
FBgn0020372	intron_FBgn0020372:5_FBgn0020372:6	2R	19767584	19767676	-0.953841	0.00121368	93
FBgn0261794	intron_FBgn0261794:21_FBgn0261794:22	2R	19809851	19809914	-0.574337	0.0484086	64
FBgn0263006	intron_FBgn0263006:5_FBgn0263006:1	2R	19815266	19816836	0.664658	0.0125188	1571
FBgn0263006	intron_FBgn0263006:13_FBgn0263006:11	2R	19820115	19820189	1.15736	4.35926e-06	75
FBgn0053519	intron_FBgn0053519:3_FBgn0053519:2	2R	19883510	19883580	0.510282	0.00215523	71
FBgn0053519	intron_FBgn0053519:17_FBgn0053519:16	2R	19890186	19890250	0.793698	0.0171632	65
FBgn0034967	intron_FBgn0034967:1_FBgn0034967:3	2R	19945426	19946006	-1.17486	0.00461601	581
FBgn0034967	intron_FBgn0034967:2_FBgn0034967:3	2R	19945430	19946006	-1.20124	0.000244071	577
FBgn0023170	intron_FBgn0023170:2_FBgn0023170:1	2R	19949516	19949720	-1.29704	1.02071e-05	205
FBgn0023170	intron_FBgn0023170:3_FBgn0023170:2	2R	19949825	19949910	-1.23973	4.63507e-05	86
FBgn0034997	intron_FBgn0034997:6_FBgn0034997:8	2R	20151621	20151682	0.746362	0.0391387	62
FBgn0035020	intron_FBgn0035020:6_FBgn0035020:7	2R	20420167	20420419	-0.464185	0.0278309	253
FBgn0027590	intron_FBgn0027590:3_FBgn0027590:2	2R	20654941	20654997	0.655502	0.0391387	57
FBgn0027590	intron_FBgn0027590:7_FBgn0027590:3	2R	20655101	20655620	0.820706	0.0139517	520
FBgn0085442	intron_FBgn0085442:1_FBgn0085442:4	2R	20769150	20770153	1.36613	0.00158442	1004
FBgn0002607	intron_FBgn0002607:4_FBgn0002607:3	2R	20856748	20856991	1.28457	0.000244071	244
FBgn0010435	intron_FBgn0010435:7_FBgn0010435:6	2R	20866342	20867055	0.521316	0.0438503	714
FBgn0050430	intron_FBgn0050430:2_FBgn0050430:3	2R	21017060	21017115	1.96632	0.000822384	56
FBgn0004181	intron_FBgn0004181:3_FBgn0004181:1	2R	21064140	21064200	1.02723	0.00539894	61
FBgn0020386	intron_FBgn0020386:5_FBgn0020386:7	3L	132810	135457	0.67227	0.0280756	2648
FBgn0020386	intron_FBgn0020386:14_FBgn0020386:18	3L	143218	143514	0.754501	0.000620022	297
FBgn0027111	intron_FBgn0027111:4_FBgn0027111:5	3L	268460	268562	-1.21313	6.71753e-05	103
FBgn0027111	intron_FBgn0027111:5_FBgn0027111:6	3L	268701	268780	-1.07605	0.00013611	80
FBgn0035143	intron_FBgn0035143:1_FBgn0035143:2	3L	581505	581556	-1.17093	0.000347923	52
FBgn0013342	intron_FBgn0013342:8_FBgn0013342:7	3L	1635238	1635300	-0.948792	0.0131641	63
FBgn0013342	intron_FBgn0013342:9_FBgn0013342:8	3L	1635460	1635533	-1.07835	0.000535701	74
FBgn0013342	intron_FBgn0013342:10_FBgn0013342:9	3L	1635685	1635936	-1.27694	0.00126971	252
FBgn0013342	intron_FBgn0013342:12_FBgn0013342:10	3L	1636010	1636817	-1.67684	6.8172e-07	808
FBgn0035253	intron_FBgn0035253:16_FBgn0035253:15	3L	1664022	1664089	-1.07108	0.00754295	68
FBgn0086906	intron_FBgn0086906:4_FBgn0086906:3	3L	2041334	2041392	0.927466	0.00257916	59
FBgn0086906	intron_FBgn0086906:37_FBgn0086906:36	3L	2094861	2094925	0.66961	0.0370408	65
FBgn0052311	intron_FBgn0052311:7_FBgn0052311:6	3L	2124614	2125238	0.977639	0.016465	625
FBgn0266696	intron_FBgn0266696:9_FBgn0266696:12	3L	2415465	2434625	0.973299	0.0434177	19161
FBgn0026189	intron_FBgn0026189:10_FBgn0026189:9	3L	3118980	3119042	0.710391	0.00545909	63
FBgn0001233	intron_FBgn0001233:1_FBgn0001233:3	3L	3193368	3194498	0.693745	0.0450026	1131
FBgn0047135	intron_FBgn0047135:4_FBgn0047135:2	3L	3198867	3198992	1.62303	0.000244071	126
FBgn0035438	intron_FBgn0035438:1_FBgn0035438:3	3L	3326368	3327342	0.784356	0.0391387	975
FBgn0035455	intron_FBgn0035455:3_FBgn0035455:2	3L	3654640	3654698	0.709918	0.0348251	59
FBgn0052264	intron_FBgn0052264:5_FBgn0052264:4	3L	3718991	3721536	-1.39633	0.0229453	2546
FBgn0264553	intron_FBgn0264553:2_FBgn0264553:1	3L	3814881	3814935	2.00622	2.80957e-07	55
FBgn0003943	intron_FBgn0003943:4_FBgn0003943:1	3L	3901771	3902526	0.631388	0.0128669	756
FBgn0027552	intron_FBgn0027552:3_FBgn0027552:2	3L	3941570	3941625	-0.603774	0.000250027	56
FBgn0027552	intron_FBgn0027552:6_FBgn0027552:5	3L	3942271	3942357	-0.787568	0.0178851	87
FBgn0042179	intron_FBgn0042179:4_FBgn0042179:5	3L	4061227	4061281	0.798186	0.0340918	55
FBgn0035495	intron_FBgn0035495:5_FBgn0035495:8	3L	4090143	4090272	-1.15994	0.00320574	130
FBgn0035515	intron_FBgn0035515:2_FBgn0035515:4	3L	4240524	4240785	-0.909294	0.0253074	262
FBgn0035583	intron_FBgn0035583:1_FBgn0035583:2	3L	4899043	4900276	-0.795433	0.0201708	1234
FBgn0035586	intron_FBgn0035586:2_FBgn0035586:1	3L	5138236	5138294	0.601045	0.0340918	59
FBgn0052423	intron_FBgn0052423:10_FBgn0052423:8	3L	5155732	5156066	-0.953051	0.0247901	335
FBgn0085447	intron_FBgn0085447:15_FBgn0085447:16	3L	5667177	5667474	-1.0403	0.0358607	298
FBgn0085447	intron_FBgn0085447:17_FBgn0085447:19	3L	5668309	5669376	-1.10579	0.044457	1068
FBgn0085447	intron_FBgn0085447:28_FBgn0085447:29	3L	5709380	5710637	-1.33548	0.00489477	1258
FBgn0085447	intron_FBgn0085447:29_FBgn0085447:30	3L	5710839	5713976	-0.855558	0.0220781	3138
FBgn0085447	intron_FBgn0085447:30_FBgn0085447:31	3L	5714205	5715481	-1.05294	0.0372823	1277
FBgn0085447	intron_FBgn0085447:31_FBgn0085447:32	3L	5715669	5719579	-1.32358	0.00108125	3911
FBgn0085447	intron_FBgn0085447:32_FBgn0085447:33	3L	5719695	5721590	-1.23714	0.0149013	1896
FBgn0085447	intron_FBgn0085447:35_FBgn0085447:37	3L	5727710	5728825	-1.2222	0.00375759	1116
FBgn0085447	intron_FBgn0085447:37_FBgn0085447:38	3L	5729021	5729085	-0.863506	0.0331043	65
FBgn0085447	intron_FBgn0085447:38_FBgn0085447:39	3L	5729195	5731083	-1.069	0.000383701	1889
FBgn0085447	intron_FBgn0085447:39_FBgn0085447:40	3L	5731264	5731325	-1.51336	4.59387e-07	62
FBgn0085447	intron_FBgn0085447:42_FBgn0085447:43	3L	5732117	5732205	-1.08302	0.00317774	89
FBgn0085447	intron_FBgn0085447:43_FBgn0085447:44	3L	5732435	5732543	-1.15362	0.000977863	109
FBgn0085447	intron_FBgn0085447:45_FBgn0085447:46	3L	5732827	5733203	-0.788073	0.00404619	377
FBgn0085447	intron_FBgn0085447:46_FBgn0085447:48	3L	5733308	5739567	-0.702122	0.0247901	6260
FBgn0020765	intron_FBgn0020765:2_FBgn0020765:1	3L	6145687	6145767	1.26181	0.00978227	81
FBgn0035709	intron_FBgn0035709:2_FBgn0035709:1	3L	6657692	6657946	1.10419	0.00960926	255
FBgn0035710	intron_FBgn0035710:3_FBgn0035710:2	3L	6683428	6683487	1.22012	0.0283913	60
FBgn0005626	intron_FBgn0005626:5_FBgn0005626:4	3L	6710527	6710652	-1.00997	0.0348019	126
FBgn0035713	intron_FBgn0035713:3_FBgn0035713:2	3L	6739588	6739661	0.851433	0.0123433	74
FBgn0035719	intron_FBgn0035719:3_FBgn0035719:5	3L	6937870	6939363	-1.14962	0.0253781	1494
FBgn0035753	intron_FBgn0035753:2_FBgn0035753:1	3L	7233878	7233954	-0.781257	0.00249576	77
FBgn0265084	intron_FBgn0265084:2_FBgn0265084:1	3L	7654607	7655570	-1.63793	2.20268e-05	964
FBgn0265084	intron_FBgn0265084:5_FBgn0265084:4	3L	7659083	7688475	-1.46724	0.00777786	29393
FBgn0035823	intron_FBgn0035823:2_FBgn0035823:3	3L	7888734	7888786	1.0804	0.0025207	53
FBgn0035903	intron_FBgn0035903:3_FBgn0035903:4	3L	8509551	8509612	-1.61313	0.0285149	62
FBgn0086348	intron_FBgn0086348:1_FBgn0086348:2	3L	8513718	8513773	-0.987329	0.00826008	56
FBgn0017579	intron_FBgn0017579:2_FBgn0017579:3	3L	8594516	8594747	-0.545861	0.0113992	232
FBgn0052023	intron_FBgn0052023:2_FBgn0052023:1	3L	8797193	8797248	0.93124	0.0278309	56
FBgn0035933	intron_FBgn0035933:1_FBgn0035933:2	3L	8804035	8804105	-0.923578	0.0138859	71
FBgn0035964	intron_FBgn0035964:2_FBgn0035964:3	3L	9127991	9128086	-1.09666	0.0289266	96
FBgn0035978	intron_FBgn0035978:9_FBgn0035978:7	3L	9346329	9346837	1.30645	0.00594313	509
FBgn0259163	intron_FBgn0259163:12_FBgn0259163:9	3L	9732414	9740234	-0.838501	0.0226147	7821
FBgn0036106	intron_FBgn0036106:2_FBgn0036106:1	3L	10874963	10875106	1.57102	5.52398e-05	144
FBgn0052069	intron_FBgn0052069:3_FBgn0052069:2	3L	11055490	11055555	-0.777024	0.0200966	66
FBgn0054012	intron_FBgn0054012:2_FBgn0054012:1	3L	11102171	11102243	0.715452	0.0229453	73
FBgn0036144	intron_FBgn0036144:4_FBgn0036144:3	3L	11172482	11172629	-0.942967	0.0244192	148
FBgn0036145	intron_FBgn0036145:5_FBgn0036145:6	3L	11193429	11193497	-1.13632	0.00885344	69
FBgn0036165	intron_FBgn0036165:4_FBgn0036165:5	3L	11488057	11488116	-0.605359	0.0105476	60
FBgn0086254	intron_FBgn0086254:3_FBgn0086254:2	3L	11614204	11614313	0.948115	0.0305045	110
FBgn0036211	intron_FBgn0036211:6_FBgn0036211:2	3L	11810417	11811187	-0.596087	0.00179046	771
FBgn0052112	intron_FBgn0052112:8_FBgn0052112:9	3L	12736927	12736987	0.922154	0.0139517	61
FBgn0036348	intron_FBgn0036348:9_FBgn0036348:10	3L	13347448	13347768	1.02188	0.022698	321
FBgn0036364	intron_FBgn0036364:1_FBgn0036364:3	3L	13434081	13434314	-0.877339	0.0455189	234
FBgn0086708	intron_FBgn0086708:7_FBgn0086708:9	3L	13475470	13475534	0.697283	0.0442614	65
FBgn0264006	intron_FBgn0264006:17_FBgn0264006:16	3L	13880566	13882648	-1.29822	0.0218471	2083
FBgn0261816	intron_FBgn0261816:1_FBgn0261816:2	3L	14560584	14560646	0.886269	0.0139969	63
FBgn0036433	intron_FBgn0036433:6_FBgn0036433:7	3L	14620596	14620655	1.13201	0.0304683	60
FBgn0036454	intron_FBgn0036454:5_FBgn0036454:6	3L	14858274	14858341	-1.09298	0.0213625	68
FBgn0023174	intron_FBgn0023174:2_FBgn0023174:3	3L	14993480	14993744	1.09057	0.0393936	265
FBgn0036502	intron_FBgn0036502:4_FBgn0036502:3	3L	15499446	15500572	0.488378	0.00594313	1127
FBgn0036512	intron_FBgn0036512:1_FBgn0036512:2	3L	15569803	15569861	0.708902	0.0316286	59
FBgn0261722	intron_FBgn0261722:7_FBgn0261722:6	3L	15809157	15809373	-1.02449	0.0146661	217
FBgn0260635	intron_FBgn0260635:5_FBgn0260635:1	3L	16033166	16039584	0.484758	0.0400487	6419
FBgn0003076	intron_FBgn0003076:4_FBgn0003076:3	3L	16121442	16121512	0.913093	0.0363265	71
FBgn0036589	intron_FBgn0036589:1_FBgn0036589:2	3L	16264452	16264524	1.05099	0.0340918	73
FBgn0262894	intron_FBgn0262894:1_FBgn0262894:2	3L	16297421	16297477	0.95629	0.00227859	57
FBgn0036623	intron_FBgn0036623:2_FBgn0036623:1	3L	16375258	16375481	0.656549	0.0178702	224
FBgn0014163	intron_FBgn0014163:5_FBgn0014163:3	3L	16398529	16398601	-0.70502	0.015981	73
FBgn0028399	intron_FBgn0028399:1_FBgn0028399:2	3L	16405981	16406347	-1.05556	0.0104346	367
FBgn0028399	intron_FBgn0028399:10_FBgn0028399:12	3L	16408057	16408120	0.716587	0.0416572	64
FBgn0036656	intron_FBgn0036656:2_FBgn0036656:1	3L	16719155	16719215	1.1645	0.0485448	61
FBgn0260943	intron_FBgn0260943:6_FBgn0260943:5	3L	17059941	17060236	-1.01157	0.00133911	296
FBgn0260943	intron_FBgn0260943:7_FBgn0260943:6	3L	17060479	17061092	-1.13356	0.0391387	614
FBgn0260943	intron_FBgn0260943:11_FBgn0260943:10	3L	17067377	17067452	-1.46255	0.000962744	76
FBgn0053051	intron_FBgn0053051:3_FBgn0053051:2	3L	17419957	17420025	0.907336	0.0238108	69
FBgn0036728	intron_FBgn0036728:1_FBgn0036728:3	3L	17467935	17468022	1.29397	0.000432887	88
FBgn0054002	intron_FBgn0054002:1_FBgn0054002:2	3L	17851721	17852509	0.726905	0.0163855	789
FBgn0036813	intron_FBgn0036813:1_FBgn0036813:2	3L	18741990	18742443	-0.600026	0.036912	454
FBgn0036816	intron_FBgn0036816:5_FBgn0036816:4	3L	18824129	18824192	0.906671	0.0431198	64
FBgn0036887	intron_FBgn0036887:3_FBgn0036887:1	3L	19578785	19578848	0.927573	0.0115912	64
FBgn0036892	intron_FBgn0036892:10_FBgn0036892:9	3L	19604681	19604843	0.81509	0.0338785	163
FBgn0004623	intron_FBgn0004623:1_FBgn0004623:2	3L	19680897	19681317	-1.65941	1.03791e-06	421
FBgn0004623	intron_FBgn0004623:2_FBgn0004623:3	3L	19681764	19681817	-1.55524	1.02071e-05	54
FBgn0004623	intron_FBgn0004623:3_FBgn0004623:4	3L	19682020	19682158	-0.804098	0.0145781	139
FBgn0004623	intron_FBgn0004623:4_FBgn0004623:5	3L	19682289	19682371	-0.613724	0.0324829	83
FBgn0013303	intron_FBgn0013303:3_FBgn0013303:4	3L	19989881	19989949	1.13877	0.01958	69
FBgn0036945	intron_FBgn0036945:1_FBgn0036945:3	3L	20181715	20181775	0.789413	0.0168182	61
FBgn0036945	intron_FBgn0036945:4_FBgn0036945:5	3L	20182289	20182419	0.955859	2.65381e-05	131
FBgn0036967	intron_FBgn0036967:7_FBgn0036967:8	3L	20301023	20301193	0.970867	0.0324829	171
FBgn0036974	intron_FBgn0036974:1_FBgn0036974:7	3L	20341486	20342041	-0.943059	0.0357612	556
FBgn0052432	intron_FBgn0052432:9_FBgn0052432:8	3L	20840881	20840935	-1.15341	0.0377357	55
FBgn0037063	intron_FBgn0037063:4_FBgn0037063:3	3L	21260821	21260890	-0.528525	0.0135086	70
FBgn0086377	intron_FBgn0086377:6_FBgn0086377:7	3L	21440598	21440655	0.710822	0.017294	58
FBgn0029152	intron_FBgn0029152:3_FBgn0029152:2	3L	21524674	21524857	0.757239	0.0025207	184
FBgn0015283	intron_FBgn0015283:3_FBgn0015283:4	3L	21530481	21530540	0.722227	0.0071866	60
FBgn0052230	intron_FBgn0052230:3_FBgn0052230:4	3L	23332577	23332633	0.910852	0.0309416	57
FBgn0011288	intron_FBgn0011288:8_FBgn0011288:9	3L	24251737	24290780	-0.879878	2.9794e-05	39044
FBgn0028697	intron_FBgn0028697:4_FBgn0028697:9	3LHet	2397820	2398127	-0.953475	0.00483451	308
FBgn0024804	intron_FBgn0024804:9_FBgn0024804:11	3LHet	2473307	2503937	0.832524	0.0137217	30631
FBgn0261436	intron_FBgn0261436:4_FBgn0261436:3	3R	54357	54449	-0.811562	0.00792432	93
FBgn0037222	intron_FBgn0037222:5_FBgn0037222:3	3R	67421	67476	2.17508	2.45461e-05	56
FBgn0037222	intron_FBgn0037222:6_FBgn0037222:4	3R	67642	67699	1.09597	0.00926945	58
FBgn0037222	intron_FBgn0037222:7_FBgn0037222:6	3R	67810	67879	1.44201	0.00955923	70
FBgn0037222	intron_FBgn0037222:9_FBgn0037222:8	3R	67996	68059	1.00165	0.0278614	64
FBgn0041605	intron_FBgn0041605:5_FBgn0041605:12	3R	107594	108395	-0.730647	0.0323953	802
FBgn0041605	intron_FBgn0041605:11_FBgn0041605:13	3R	108557	109947	-0.790467	0.00250405	1391
FBgn0041605	intron_FBgn0041605:16_FBgn0041605:18	3R	117992	120841	-1.42462	0.0485182	2850
FBgn0041605	intron_FBgn0041605:18_FBgn0041605:22	3R	121009	121289	-0.938882	0.000946527	281
FBgn0041605	intron_FBgn0041605:20_FBgn0041605:25	3R	121423	123209	-0.754943	0.00151929	1787
FBgn0051523	intron_FBgn0051523:4_FBgn0051523:3	3R	293491	293565	0.67818	0.00955179	75
FBgn0051523	intron_FBgn0051523:8_FBgn0051523:6	3R	294127	294185	0.372392	0.0226649	59
FBgn0263346	intron_FBgn0263346:8_FBgn0263346:9	3R	506560	522912	1.09782	0.0123433	16353
FBgn0026620	intron_FBgn0026620:7_FBgn0026620:6	3R	561526	562744	-0.417464	0.0323953	1219
FBgn0260794	intron_FBgn0260794:3_FBgn0260794:1	3R	614010	614095	0.970078	0.0161991	86
FBgn0087005	intron_FBgn0087005:2_FBgn0087005:1	3R	1062389	1062594	-1.01109	0.00411763	206
FBgn0087005	intron_FBgn0087005:3_FBgn0087005:2	3R	1062896	1062953	-1.42819	9.58547e-06	58
FBgn0051542	intron_FBgn0051542:2_FBgn0051542:4	3R	1196146	1196207	0.733945	0.0377357	62
FBgn0037328	intron_FBgn0037328:4_FBgn0037328:3	3R	1292104	1292701	0.837957	0.00658557	598
FBgn0250753	intron_FBgn0250753:5_FBgn0250753:4	3R	1423238	1423493	1.40269	5.39432e-05	256
FBgn0037461	intron_FBgn0037461:3_FBgn0037461:2	3R	2454337	2454386	0.782257	0.0294737	50
FBgn0250732	intron_FBgn0250732:4_FBgn0250732:3	3R	2972815	2973052	1.14764	0.0407255	238
FBgn0037486	intron_FBgn0037486:9_FBgn0037486:7	3R	3045198	3045256	0.953828	0.0278614	59
FBgn0028400	intron_FBgn0028400:4_FBgn0028400:5	3R	3094852	3094914	-1.06666	0.0132593	63
FBgn0004175	intron_FBgn0004175:2_FBgn0004175:1	3R	3189361	3189412	1.03145	0.00503198	52
FBgn0261502	intron_FBgn0261502:1_FBgn0261502:2	3R	3217512	3217562	0.846648	0.0229453	51
FBgn0042101	intron_FBgn0042101:2_FBgn0042101:1	3R	3623031	3623092	0.87365	0.040697	62
FBgn0042101	intron_FBgn0042101:3_FBgn0042101:2	3R	3624062	3624357	1.17173	0.0104346	296
FBgn0037547	intron_FBgn0037547:3_FBgn0037547:4	3R	3913734	3913799	0.643133	5.78982e-05	66
FBgn0037607	intron_FBgn0037607:5_FBgn0037607:6	3R	4499032	4499099	0.602594	0.0316286	68
FBgn0010222	intron_FBgn0010222:4_FBgn0010222:2	3R	4869362	4874878	-1.06597	0.00895615	5517
FBgn0083953	intron_FBgn0083953:2_FBgn0083953:1	3R	5225663	5225718	0.864234	0.000306104	56
FBgn0261599	intron_FBgn0261599:1_FBgn0261599:3	3R	5603919	5604340	1.20346	0.000194209	422
FBgn0037754	intron_FBgn0037754:4_FBgn0037754:5	3R	5612171	5612306	-1.15799	0.0247901	136
FBgn0037763	intron_FBgn0037763:2_FBgn0037763:1	3R	5642392	5642463	0.637194	0.0431863	72
FBgn0004575	intron_FBgn0004575:11_FBgn0004575:12	3R	6042953	6043011	-0.98817	0.0277009	59
FBgn0004575	intron_FBgn0004575:12_FBgn0004575:13	3R	6044414	6045500	-0.800781	0.0370408	1087
FBgn0040256	intron_FBgn0040256:2_FBgn0040256:1	3R	6953729	6953789	-1.23453	0.00128354	61
FBgn0026314	intron_FBgn0026314:2_FBgn0026314:1	3R	6995623	6995694	0.557677	0.0146383	72
FBgn0020910	intron_FBgn0020910:3_FBgn0020910:5	3R	7048452	7048809	1.18248	0.0244729	358
FBgn0020910	intron_FBgn0020910:3_FBgn0020910:6	3R	7048452	7049116	-0.404132	0.0363741	665
FBgn0037934	intron_FBgn0037934:2_FBgn0037934:1	3R	7506925	7506984	-0.655261	0.000561015	60
FBgn0260745	intron_FBgn0260745:3_FBgn0260745:2	3R	7811954	7812025	-0.611281	0.0372823	72
FBgn0037987	intron_FBgn0037987:2_FBgn0037987:1	3R	7874795	7874853	1.09177	0.000445251	59
FBgn0037988	intron_FBgn0037988:3_FBgn0037988:2	3R	7887328	7887428	0.933736	0.0454527	101
FBgn0037999	intron_FBgn0037999:3_FBgn0037999:2	3R	8047078	8047138	-1.21867	0.0340918	61
FBgn0038033	intron_FBgn0038033:7_FBgn0038033:6	3R	8220702	8220797	0.55896	0.0311591	96
FBgn0086687	intron_FBgn0086687:2_FBgn0086687:6	3R	8267331	8270520	-1.61593	0.0161991	3190
FBgn0266247	intron_FBgn0266247:2_FBgn0266247:1	3R	8444827	8444957	-1.5196	0.044218	131
FBgn0038074	intron_FBgn0038074:3_FBgn0038074:4	3R	8501166	8501457	-0.375533	0.0454527	292
FBgn0001296	intron_FBgn0001296:7_FBgn0001296:6	3R	8513844	8514930	-2.18265	0.0176014	1087
FBgn0038098	intron_FBgn0038098:2_FBgn0038098:1	3R	8794006	8794066	-0.857186	0.0429535	61
FBgn0038115	intron_FBgn0038115:5_FBgn0038115:4	3R	8876647	8876841	1.32345	0.00901457	195
FBgn0038122	intron_FBgn0038122:1_FBgn0038122:2	3R	9007374	9007429	1.34376	4.99512e-05	56
FBgn0038143	intron_FBgn0038143:8_FBgn0038143:6	3R	9204008	9204123	-1.28566	0.0161874	116
FBgn0038167	intron_FBgn0038167:3_FBgn0038167:5	3R	9502667	9502743	1.38355	0.000150564	77
FBgn0028487	intron_FBgn0028487:11_FBgn0028487:10	3R	9523187	9523244	0.636687	0.0123433	58
FBgn0038181	intron_FBgn0038181:3_FBgn0038181:6	3R	9597372	9597893	1.12362	0.00042131	522
FBgn0038181	intron_FBgn0038181:5_FBgn0038181:6	3R	9597744	9597893	0.592601	0.0376587	150
FBgn0038181	intron_FBgn0038181:16_FBgn0038181:17	3R	9602279	9602513	0.817827	0.0188422	235
FBgn0038181	intron_FBgn0038181:17_FBgn0038181:18	3R	9602687	9602974	0.480446	0.0271518	288
FBgn0038186	intron_FBgn0038186:3_FBgn0038186:2	3R	9681031	9681086	1.01245	0.00078779	56
FBgn0016672	intron_FBgn0016672:1_FBgn0016672:2	3R	9785137	9785420	-0.670615	0.0324829	284
FBgn0038194	intron_FBgn0038194:1_FBgn0038194:2	3R	9855536	9855853	-0.835229	0.00114177	318
FBgn0038194	intron_FBgn0038194:2_FBgn0038194:3	3R	9856007	9856075	-0.82774	0.00449186	69
FBgn0038194	intron_FBgn0038194:3_FBgn0038194:4	3R	9856507	9856597	-0.493229	0.00446503	91
FBgn0038198	intron_FBgn0038198:2_FBgn0038198:3	3R	9916602	9917019	-0.529299	0.0152936	418
FBgn0038224	intron_FBgn0038224:1_FBgn0038224:4	3R	10152850	10152974	1.70909	1.62435e-08	125
FBgn0038237	intron_FBgn0038237:13_FBgn0038237:12	3R	10355953	10380096	-0.810672	0.0295574	24144
FBgn0051313	intron_FBgn0051313:6_FBgn0051313:4	3R	10393003	10393060	-0.944146	0.0159131	58
FBgn0011217	intron_FBgn0011217:6_FBgn0011217:5	3R	10563206	10566101	0.701062	0.0474561	2896
FBgn0038258	intron_FBgn0038258:2_FBgn0038258:1	3R	10579977	10580035	0.67373	0.0427912	59
FBgn0038294	intron_FBgn0038294:2_FBgn0038294:1	3R	10997097	10997657	-0.782067	0.0489662	561
FBgn0016691	intron_FBgn0016691:1_FBgn0016691:2	3R	11091413	11091648	1.12457	5.55393e-05	236
FBgn0038326	intron_FBgn0038326:1_FBgn0038326:2	3R	11183043	11183111	0.595168	0.0320453	69
FBgn0038347	intron_FBgn0038347:2_FBgn0038347:1	3R	11358230	11358289	-0.506171	0.0315018	60
FBgn0027657	intron_FBgn0027657:10_FBgn0027657:5	3R	11723738	11730223	-0.818564	0.0338785	6486
FBgn0013334	intron_FBgn0013334:2_FBgn0013334:6	3R	11761307	11761674	-0.66416	0.0268801	368
FBgn0013334	intron_FBgn0013334:11_FBgn0013334:13	3R	11779957	11780304	-0.662651	0.0383998	348
FBgn0013334	intron_FBgn0013334:18_FBgn0013334:20	3R	11783642	11785041	-0.420616	0.0374157	1400
FBgn0038398	intron_FBgn0038398:4_FBgn0038398:5	3R	11911531	11911599	-0.942896	0.0176764	69
FBgn0250823	intron_FBgn0250823:16_FBgn0250823:18	3R	12119876	12122383	0.678992	0.0484431	2508
FBgn0038420	intron_FBgn0038420:5_FBgn0038420:4	3R	12178082	12182521	1.47699	0.000480029	4440
FBgn0004087	intron_FBgn0004087:1_FBgn0004087:3	3R	12307063	12307112	-0.7788	0.0325079	50
FBgn0020907	intron_FBgn0020907:3_FBgn0020907:2	3R	12402765	12403042	-0.740148	0.00253096	278
FBgn0038450	intron_FBgn0038450:3_FBgn0038450:4	3R	12444510	12444564	0.679278	0.00995153	55
FBgn0261932	intron_FBgn0261932:1_FBgn0261932:3	3R	13232492	13232770	1.47738	0.0184709	279
FBgn0262003	intron_FBgn0262003:1_FBgn0262003:2	3R	13238985	13239042	0.685883	0.0247901	58
FBgn0038516	intron_FBgn0038516:7_FBgn0038516:9	3R	13362421	13362492	-0.878559	0.0232895	72
FBgn0025571	intron_FBgn0025571:1_FBgn0025571:2	3R	13366526	13366697	-0.955125	0.00577667	172
FBgn0038524	intron_FBgn0038524:5_FBgn0038524:6	3R	13433781	13433861	1.13217	0.0370919	81
FBgn0051226	intron_FBgn0051226:2_FBgn0051226:1	3R	14677099	14677151	1.29994	1.23678e-06	53
FBgn0038662	intron_FBgn0038662:4_FBgn0038662:3	3R	14753851	14753916	0.58582	0.0240136	66
FBgn0038662	intron_FBgn0038662:5_FBgn0038662:4	3R	14754037	14754110	0.938563	0.00812183	74
FBgn0263983	intron_FBgn0263983:6_FBgn0263983:7	3R	14796011	14796352	-0.895228	0.0427912	342
FBgn0263983	intron_FBgn0263983:8_FBgn0263983:9	3R	14797139	14797208	-0.930599	0.0115573	70
FBgn0263983	intron_FBgn0263983:9_FBgn0263983:10	3R	14797311	14797505	-1.09363	0.00238453	195
FBgn0038700	intron_FBgn0038700:3_FBgn0038700:4	3R	15214177	15214236	-1.06485	0.00858359	60
FBgn0038701	intron_FBgn0038701:4_FBgn0038701:5	3R	15217288	15217348	0.901125	0.0245356	61
FBgn0038702	intron_FBgn0038702:4_FBgn0038702:5	3R	15220331	15220394	0.606244	0.0441372	64
FBgn0051221	intron_FBgn0051221:4_FBgn0051221:5	3R	15266554	15279788	-0.914934	0.00645402	13235
FBgn0051221	intron_FBgn0051221:5_FBgn0051221:6	3R	15279988	15282841	-0.901612	0.0283913	2854
FBgn0038718	intron_FBgn0038718:5_FBgn0038718:6	3R	15437906	15437963	-1.20294	8.85112e-05	58
FBgn0038719	intron_FBgn0038719:2_FBgn0038719:3	3R	15440019	15440076	0.880603	0.0238747	58
FBgn0026753	intron_FBgn0026753:3_FBgn0026753:2	3R	15469561	15469927	-0.535081	0.00753499	367
FBgn0002940	intron_FBgn0002940:4_FBgn0002940:3	3R	15712946	15713120	-0.627958	0.0247901	175
FBgn0002940	intron_FBgn0002940:5_FBgn0002940:4	3R	15713682	15713744	-1.66726	1.44894e-07	63
FBgn0260234	intron_FBgn0260234:4_FBgn0260234:2	3R	15740735	15740802	-0.887685	0.0102916	68
FBgn0262582	intron_FBgn0262582:7_FBgn0262582:9	3R	16116306	16116683	-0.91962	0.0444113	378
FBgn0053192	intron_FBgn0053192:1_FBgn0053192:2	3R	16360764	16360829	-1.83589	9.62698e-16	66
FBgn0038829	intron_FBgn0038829:3_FBgn0038829:1	3R	16645217	16646371	-0.597452	0.0113836	1155
FBgn0038834	intron_FBgn0038834:1_FBgn0038834:3	3R	16676350	16676576	-0.56015	0.0213958	227
FBgn0002921	intron_FBgn0002921:10_FBgn0002921:15	3R	16792336	16796604	-0.766686	0.0245356	4269
FBgn0013995	intron_FBgn0013995:3_FBgn0013995:4	3R	16811806	16811868	1.05552	0.048698	63
FBgn0000083	intron_FBgn0000083:7_FBgn0000083:9	3R	16894742	16895999	-0.718233	2.82106e-05	1258
FBgn0015790	intron_FBgn0015790:1_FBgn0015790:3	3R	16937189	16937376	-0.691611	0.0246776	188
FBgn0023423	intron_FBgn0023423:8_FBgn0023423:7	3R	16948316	16950883	0.973767	0.0204009	2568
FBgn0043012	intron_FBgn0043012:3_FBgn0043012:2	3R	17095617	17095672	-0.741064	0.0180947	56
FBgn0038878	intron_FBgn0038878:5_FBgn0038878:4	3R	17101303	17101360	1.02232	8.24906e-11	58
FBgn0262144	intron_FBgn0262144:2_FBgn0262144:1	3R	17562844	17562907	-1.09079	0.00253096	64
FBgn0013759	intron_FBgn0013759:5_FBgn0013759:4	3R	17613003	17613507	-0.899846	0.000589785	505
FBgn0013759	intron_FBgn0013759:6_FBgn0013759:5	3R	17613631	17613704	-1.05714	0.00327986	74
FBgn0013759	intron_FBgn0013759:7_FBgn0013759:6	3R	17613825	17614595	-1.49753	0.0152508	771
FBgn0013759	intron_FBgn0013759:13_FBgn0013759:12	3R	17617616	17617682	-1.5458	0.0024464	67
FBgn0264490	intron_FBgn0264490:6_FBgn0264490:7	3R	17821494	17821559	-0.68002	0.00442353	66
FBgn0264490	intron_FBgn0264490:7_FBgn0264490:8	3R	17821778	17822051	-0.518804	0.0304689	274
FBgn0019960	intron_FBgn0019960:8_FBgn0019960:7	3R	17847455	17847514	0.790603	0.00308952	60
FBgn0259736	intron_FBgn0259736:3_FBgn0259736:4	3R	17952189	17954968	-0.772304	0.0293875	2780
FBgn0038946	intron_FBgn0038946:3_FBgn0038946:4	3R	18178193	18178252	-1.02391	0.0020068	60
FBgn0038946	intron_FBgn0038946:5_FBgn0038946:6	3R	18178598	18181413	-0.914348	0.0298134	2816
FBgn0038947	intron_FBgn0038947:1_FBgn0038947:5	3R	18182472	18183252	0.855887	0.0075562	781
FBgn0038961	intron_FBgn0038961:3_FBgn0038961:2	3R	18234732	18234784	1.49479	0.00439563	53
FBgn0038986	intron_FBgn0038986:4_FBgn0038986:3	3R	18386152	18388246	0.994037	0.0036273	2095
FBgn0053107	intron_FBgn0053107:2_FBgn0053107:1	3R	18409246	18409316	0.810249	0.0452523	71
FBgn0017590	intron_FBgn0017590:5_FBgn0017590:6	3R	18779191	18781473	-1.18109	0.0354432	2283
FBgn0263390	intron_FBgn0263390:2_FBgn0263390:1	3R	18807568	18808314	1.17393	0.0166133	747
FBgn0039054	intron_FBgn0039054:5_FBgn0039054:3	3R	18899724	18900736	-1.30944	0.00327668	1013
FBgn0039050	intron_FBgn0039050:2_FBgn0039050:3	3R	18917684	18917777	-0.680279	0.0113836	94
FBgn0039050	intron_FBgn0039050:4_FBgn0039050:5	3R	18918741	18918803	-1.36094	3.35542e-05	63
FBgn0039050	intron_FBgn0039050:5_FBgn0039050:7	3R	18919156	18919222	1.21516	0.0134095	67
FBgn0262009	intron_FBgn0262009:3_FBgn0262009:4	3R	19198957	19199022	-1.06273	1.01619e-06	66
FBgn0051515	intron_FBgn0051515:2_FBgn0051515:1	3R	19214404	19214460	0.99559	0.0340918	57
FBgn0039109	intron_FBgn0039109:3_FBgn0039109:5	3R	19554263	19554388	1.01379	8.21371e-05	126
FBgn0263782	intron_FBgn0263782:2_FBgn0263782:3	3R	19573278	19573612	0.811329	0.0247901	335
FBgn0039140	intron_FBgn0039140:3_FBgn0039140:1	3R	19860752	19861009	0.646713	0.0440613	258
FBgn0053100	intron_FBgn0053100:6_FBgn0053100:5	3R	19893787	19927017	-0.741123	0.000445251	33231
FBgn0011225	intron_FBgn0011225:19_FBgn0011225:18	3R	20083855	20083917	0.756225	0.00443329	63
FBgn0011581	intron_FBgn0011581:1_FBgn0011581:3	3R	20167403	20168549	-1.01865	0.00241815	1147
FBgn0039188	intron_FBgn0039188:2_FBgn0039188:1	3R	20182208	20182262	1.08004	0.0325399	55
FBgn0045866	intron_FBgn0045866:2_FBgn0045866:3	3R	20865544	20865607	-0.61118	0.0106705	64
FBgn0039265	intron_FBgn0039265:5_FBgn0039265:7	3R	20874513	20874993	1.01517	0.0350311	481
FBgn0039266	intron_FBgn0039266:2_FBgn0039266:5	3R	20876091	20876902	0.829734	0.0244729	812
FBgn0039298	intron_FBgn0039298:2_FBgn0039298:3	3R	21066329	21066395	-1.0413	0.00317321	67
FBgn0039300	intron_FBgn0039300:3_FBgn0039300:2	3R	21072390	21073154	0.775598	0.00357472	765
FBgn0051300	intron_FBgn0051300:2_FBgn0051300:3	3R	21110558	21110627	-1.29304	0.0222666	70
FBgn0039321	intron_FBgn0039321:5_FBgn0039321:3	3R	21133632	21134032	1.06048	0.0014131	401
FBgn0053494	intron_FBgn0053494:4_FBgn0053494:3	3R	21320143	21320838	-1.09407	0.0300736	696
FBgn0261287	intron_FBgn0261287:5_FBgn0261287:3	3R	21418014	21418304	1.00883	0.0270533	291
FBgn0039358	intron_FBgn0039358:4_FBgn0039358:6	3R	21508014	21508077	0.526433	0.0465386	64
FBgn0051092	intron_FBgn0051092:8_FBgn0051092:7	3R	21527384	21531652	0.615292	0.0465386	4269
FBgn0042710	intron_FBgn0042710:1_FBgn0042710:2	3R	22277014	22277101	0.764694	0.00658557	88
FBgn0023179	intron_FBgn0023179:8_FBgn0023179:7	3R	22527327	22527669	-1.35243	0.0201708	343
FBgn0261860	intron_FBgn0261860:4_FBgn0261860:1	3R	22609610	22609672	0.994214	0.000346493	63
FBgn0001197	intron_FBgn0001197:2_FBgn0001197:3	3R	22693209	22693390	-0.726636	0.0384385	182
FBgn0039464	intron_FBgn0039464:3_FBgn0039464:2	3R	22776291	22776359	-0.77214	0.0276048	69
FBgn0039472	intron_FBgn0039472:2_FBgn0039472:1	3R	22843909	22843964	1.6231	0.0485781	56
FBgn0039474	intron_FBgn0039474:2_FBgn0039474:1	3R	22846978	22847035	1.15301	0.0128436	58
FBgn0039481	intron_FBgn0039481:2_FBgn0039481:1	3R	22916329	22916701	-0.729184	0.0370408	373
FBgn0029155	intron_FBgn0029155:2_FBgn0029155:3	3R	22980113	22980177	-0.809154	0.00223938	65
FBgn0046247	intron_FBgn0046247:2_FBgn0046247:5	3R	23101508	23102014	1.01137	0.0354432	507
FBgn0039532	intron_FBgn0039532:4_FBgn0039532:5	3R	23463726	23463794	1.45643	0.00124517	69
FBgn0003279	intron_FBgn0003279:1_FBgn0003279:2	3R	23748642	23748846	0.780417	0.00288168	205
FBgn0085391	intron_FBgn0085391:9_FBgn0085391:10	3R	23908813	23908951	-1.30286	0.000946527	139
FBgn0024273	intron_FBgn0024273:3_FBgn0024273:2	3R	24651676	24651731	-1.0284	0.0060099	56
FBgn0015622	intron_FBgn0015622:6_FBgn0015622:5	3R	25142352	25142441	-1.6694	0.000625419	90
FBgn0250832	intron_FBgn0250832:3_FBgn0250832:1	3R	25540913	25540965	-0.825353	0.00249061	53
FBgn0039719	intron_FBgn0039719:1_FBgn0039719:2	3R	25731238	25731693	0.96973	0.0219557	456
FBgn0039719	intron_FBgn0039719:2_FBgn0039719:3	3R	25731822	25731878	0.677897	0.0152508	57
FBgn0003861	intron_FBgn0003861:2_FBgn0003861:1	3R	25741275	25741334	-0.895076	0.00367817	60
FBgn0003861	intron_FBgn0003861:3_FBgn0003861:2	3R	25741490	25741548	-1.32829	6.09563e-05	59
FBgn0003861	intron_FBgn0003861:4_FBgn0003861:3	3R	25741710	25741764	-1.26357	5.81746e-05	55
FBgn0003861	intron_FBgn0003861:5_FBgn0003861:4	3R	25741931	25742141	-1.22074	3.34197e-05	211
FBgn0003861	intron_FBgn0003861:6_FBgn0003861:5	3R	25742362	25742676	-1.68609	3.11356e-09	315
FBgn0003861	intron_FBgn0003861:8_FBgn0003861:7	3R	25743464	25743520	-1.5711	1.84621e-10	57
FBgn0003861	intron_FBgn0003861:9_FBgn0003861:8	3R	25743820	25743874	-1.50007	6.72397e-05	55
FBgn0003861	intron_FBgn0003861:10_FBgn0003861:9	3R	25744110	25744276	-1.92315	8.38183e-14	167
FBgn0003861	intron_FBgn0003861:12_FBgn0003861:10	3R	25744454	25744547	-2.16648	5.57342e-11	94
FBgn0003861	intron_FBgn0003861:13_FBgn0003861:11	3R	25744750	25745136	-1.83951	1.01006e-10	387
FBgn0003861	intron_FBgn0003861:14_FBgn0003861:13	3R	25745280	25745340	-1.92109	6.94055e-07	61
FBgn0003861	intron_FBgn0003861:15_FBgn0003861:14	3R	25745579	25745636	-1.48392	0.00337714	58
FBgn0003358	intron_FBgn0003358:2_FBgn0003358:1	3R	25751577	25751633	-1.09123	0.0215377	57
FBgn0039732	intron_FBgn0039732:2_FBgn0039732:1	3R	25823098	25823159	0.954538	0.00134683	62
FBgn0002626	intron_FBgn0002626:3_FBgn0002626:2	3R	25871347	25871408	-1.0293	0.0485913	62
FBgn0039755	intron_FBgn0039755:2_FBgn0039755:1	3R	26021107	26021168	1.21787	5.73251e-06	62
FBgn0039755	intron_FBgn0039755:4_FBgn0039755:3	3R	26021633	26021724	0.94834	0.0347472	92
FBgn0039761	intron_FBgn0039761:3_FBgn0039761:4	3R	26079442	26079500	0.855343	0.00100479	59
FBgn0015222	intron_FBgn0015222:4_FBgn0015222:3	3R	26211979	26212040	-0.613724	0.0115269	62
FBgn0015221	intron_FBgn0015221:6_FBgn0015221:7	3R	26215051	26215137	-0.86215	0.0134095	87
FBgn0000313	intron_FBgn0000313:4_FBgn0000313:3	3R	27031015	27031077	-1.11931	0.000561015	63
FBgn0000313	intron_FBgn0000313:5_FBgn0000313:4	3R	27031502	27031559	-1.23951	2.06448e-05	58
FBgn0000313	intron_FBgn0000313:6_FBgn0000313:5	3R	27031919	27031977	-1.50046	0.00502365	59
FBgn0000313	intron_FBgn0000313:7_FBgn0000313:6	3R	27032120	27032176	-1.31539	0.000655284	57
FBgn0000313	intron_FBgn0000313:8_FBgn0000313:7	3R	27032434	27032488	-1.20956	0.0213878	55
FBgn0000313	intron_FBgn0000313:9_FBgn0000313:8	3R	27032620	27032673	-1.92706	9.73293e-07	54
FBgn0000313	intron_FBgn0000313:10_FBgn0000313:9	3R	27033284	27033342	-1.95442	0.000250027	59
FBgn0000313	intron_FBgn0000313:12_FBgn0000313:11	3R	27033572	27033656	-1.29569	0.00926945	85
FBgn0000313	intron_FBgn0000313:13_FBgn0000313:12	3R	27033792	27034090	-2.20484	2.12025e-05	299
FBgn0000313	intron_FBgn0000313:14_FBgn0000313:13	3R	27034267	27034364	-1.80844	0.0102687	98
FBgn0000313	intron_FBgn0000313:15_FBgn0000313:14	3R	27035079	27035204	-1.52246	0.0452523	126
FBgn0000313	intron_FBgn0000313:17_FBgn0000313:16	3R	27035442	27035982	-3.15336	1.92033e-06	541
FBgn0261988	intron_FBgn0261988:3_FBgn0261988:4	3R	27259611	27279032	-2.65538	0.00200702	19422
FBgn0000557	intron_FBgn0000557:3_FBgn0000557:4	3R	27565587	27566038	-0.894725	0.0130992	452
FBgn0000557	intron_FBgn0000557:3_FBgn0000557:5	3R	27565587	27566041	-0.798031	0.0429535	455
FBgn0039875	intron_FBgn0039875:5_FBgn0039875:7	3R	27599942	27599997	0.720311	0.0440613	56
FBgn0085503	intron_FBgn0085503:1_FBgn0085503:2	U	5507966	5508029	0.721838	0.0452752	64
FBgn0000108	intron_FBgn0000108:4_FBgn0000108:5	X	454810	464894	-1.09489	0.0109838	10085
FBgn0000108	intron_FBgn0000108:6_FBgn0000108:8	X	465386	465459	-1.22101	0.0138784	74
FBgn0000108	intron_FBgn0000108:10_FBgn0000108:13	X	466323	467897	-1.3908	0.0146661	1575
FBgn0000108	intron_FBgn0000108:13_FBgn0000108:14	X	468036	468228	-1.04003	0.000773199	193
FBgn0000108	intron_FBgn0000108:14_FBgn0000108:15	X	468912	468974	-1.11513	0.00439563	63
FBgn0000108	intron_FBgn0000108:17_FBgn0000108:20	X	469384	469503	-0.789677	0.0271518	120
FBgn0264449	intron_FBgn0264449:7_FBgn0264449:6	X	712826	712883	-1.23478	0.0285149	58
FBgn0027795	intron_FBgn0027795:3_FBgn0027795:2	X	1349983	1350055	0.939355	0.0359848	73
FBgn0004654	intron_FBgn0004654:2_FBgn0004654:3	X	2039448	2039522	1.33628	0.00129417	75
FBgn0029608	intron_FBgn0029608:2_FBgn0029608:1	X	2146699	2146756	-0.819116	0.0396612	58
FBgn0029608	intron_FBgn0029608:3_FBgn0029608:2	X	2146894	2146948	-0.745392	0.0429334	55
FBgn0001404	intron_FBgn0001404:1_FBgn0001404:4	X	2483540	2489758	-0.676896	0.00576222	6219
FBgn0003371	intron_FBgn0003371:32_FBgn0003371:33	X	2567652	2567938	1.57495	3.34795e-05	287
FBgn0000479	intron_FBgn0000479:31_FBgn0000479:32	X	3232174	3232247	0.855398	0.0320658	74
FBgn0019661	intron_FBgn0019661:5_FBgn0019661:3	X	3755984	3756053	-0.844627	0.0431863	70
FBgn0029705	intron_FBgn0029705:4_FBgn0029705:3	X	4222599	4223191	1.26815	0.00716641	593
FBgn0262738	intron_FBgn0262738:6_FBgn0262738:7	X	4243621	4243685	-1.4549	0.000810799	65
FBgn0262738	intron_FBgn0262738:7_FBgn0262738:8	X	4243746	4247499	-1.00222	0.00840997	3754
FBgn0262738	intron_FBgn0262738:8_FBgn0262738:10	X	4247647	4248503	-1.30897	0.0105575	857
FBgn0262738	intron_FBgn0262738:11_FBgn0262738:12	X	4251310	4251377	-1.45077	0.00243656	68
FBgn0262738	intron_FBgn0262738:12_FBgn0262738:13	X	4251545	4251608	-1.02889	0.00108125	64
FBgn0262738	intron_FBgn0262738:13_FBgn0262738:14	X	4251914	4252308	-1.03492	0.0427912	395
FBgn0262738	intron_FBgn0262738:15_FBgn0262738:16	X	4252905	4253099	-1.32994	0.00598272	195
FBgn0262738	intron_FBgn0262738:16_FBgn0262738:17	X	4254364	4254427	-0.574928	0.0305885	64
FBgn0029752	intron_FBgn0029752:4_FBgn0029752:3	X	5205753	5205885	-0.699439	0.0335073	133
FBgn0029765	intron_FBgn0029765:1_FBgn0029765:2	X	5321724	5321838	-0.471094	0.0336789	115
FBgn0259994	intron_FBgn0259994:17_FBgn0259994:16	X	5530612	5531567	-1.32184	0.0396822	956
FBgn0029789	intron_FBgn0029789:2_FBgn0029789:1	X	5580114	5580173	-1.01203	0.0359848	60
FBgn0029820	intron_FBgn0029820:1_FBgn0029820:4	X	5774142	5774866	0.63879	0.0146141	725
FBgn0029826	intron_FBgn0029826:2_FBgn0029826:3	X	5843319	5843383	-0.785069	0.00548656	65
FBgn0262730	intron_FBgn0262730:10_FBgn0262730:12	X	6123824	6123881	-1.09651	0.0431863	58
FBgn0029870	intron_FBgn0029870:2_FBgn0029870:3	X	6260266	6260665	0.652263	0.0105575	400
FBgn0014031	intron_FBgn0014031:1_FBgn0014031:2	X	6423299	6423599	-0.837333	0.00659218	301
FBgn0016041	intron_FBgn0016041:6_FBgn0016041:8	X	7632833	7632933	0.733889	0.038709	101
FBgn0011586	intron_FBgn0011586:4_FBgn0011586:2	X	8799418	8799537	1.16057	0.0275209	120
FBgn0261549	intron_FBgn0261549:23_FBgn0261549:24	X	8917829	8918106	-2.16874	2.65381e-05	278
FBgn0261549	intron_FBgn0261549:24_FBgn0261549:25	X	8918171	8918293	-1.2946	0.000566486	123
FBgn0040931	intron_FBgn0040931:3_FBgn0040931:1	X	9053882	9053939	1.4325	0.000232065	58
FBgn0030101	intron_FBgn0030101:2_FBgn0030101:1	X	9089255	9089583	1.02464	0.0396822	329
FBgn0086367	intron_FBgn0086367:4_FBgn0086367:3	X	9112738	9112806	-0.857671	0.0200082	69
FBgn0086367	intron_FBgn0086367:9_FBgn0086367:8	X	9115543	9116972	-0.862637	0.0113181	1430
FBgn0030148	intron_FBgn0030148:4_FBgn0030148:3	X	9554849	9554913	0.864175	0.036912	65
FBgn0030151	intron_FBgn0030151:2_FBgn0030151:3	X	9672843	9672900	1.04538	0.0122079	58
FBgn0259918	intron_FBgn0259918:2_FBgn0259918:1	X	11621398	11626387	-2.34113	1.57801e-17	4990
FBgn0030332	intron_FBgn0030332:2_FBgn0030332:1	X	11657857	11657938	-1.10968	0.000400876	82
FBgn0262687	intron_FBgn0262687:2_FBgn0262687:1	X	11813340	11813391	1.17677	0.000566486	52
FBgn0040859	intron_FBgn0040859:2_FBgn0040859:4	X	11985552	11985612	0.671244	0.038469	61
FBgn0259240	intron_FBgn0259240:16_FBgn0259240:17	X	12170652	12179533	-0.893744	0.0481929	8882
FBgn0010198	intron_FBgn0010198:4_FBgn0010198:2	X	13230413	13231537	1.10228	0.0196708	1125
FBgn0030482	intron_FBgn0030482:2_FBgn0030482:3	X	13293038	13293363	1.46931	0.000262484	326
FBgn0003218	intron_FBgn0003218:18_FBgn0003218:21	X	13668012	13669465	-1.25285	0.00696934	1454
FBgn0030558	intron_FBgn0030558:3_FBgn0030558:5	X	14158358	14158423	-0.582024	0.0282431	66
FBgn0030572	intron_FBgn0030572:2_FBgn0030572:1	X	14476389	14476531	-1.17905	0.000445251	143
FBgn0030697	intron_FBgn0030697:2_FBgn0030697:3	X	15733528	15733583	0.539373	0.048698	56
FBgn0259110	intron_FBgn0259110:28_FBgn0259110:27	X	15859307	15859417	-0.959714	0.00728172	111
FBgn0030734	intron_FBgn0030734:4_FBgn0030734:3	X	16188688	16188757	0.626834	0.035581	70
FBgn0030745	intron_FBgn0030745:6_FBgn0030745:7	X	16281323	16281379	0.654636	0.0259336	57
FBgn0264255	intron_FBgn0264255:27_FBgn0264255:26	X	16392690	16392748	-1.05793	0.0301234	59
FBgn0030788	intron_FBgn0030788:2_FBgn0030788:4	X	16682376	16682599	-0.948664	0.0473653	224
FBgn0250788	intron_FBgn0250788:5_FBgn0250788:7	X	17561772	17562139	-0.86659	0.0409668	368
FBgn0004028	intron_FBgn0004028:20_FBgn0004028:17	X	18008680	18010739	0.740415	0.0427893	2060
FBgn0030999	intron_FBgn0030999:1_FBgn0030999:2	X	19107440	19107509	-0.577435	0.0338785	70
FBgn0031012	intron_FBgn0031012:2_FBgn0031012:1	X	19195757	19195832	1.11222	0.0229453	76
FBgn0261593	intron_FBgn0261593:1_FBgn0261593:4	X	19492107	19492181	-0.856142	0.0233094	75
FBgn0031049	intron_FBgn0031049:1_FBgn0031049:4	X	19537498	19537897	1.33221	0.0200966	400
FBgn0027279	intron_FBgn0027279:20_FBgn0027279:22	X	21905577	21906064	1.16994	0.0464158	488
FBgn0016976	intron_FBgn0016976:11_FBgn0016976:9	X	22395840	22396319	-1.06554	0.0348378	480
FBgn0052000	intron_FBgn0052000:15_FBgn0052000:16	4	158379	158432	-0.961668	0.025427	54
FBgn0052006	intron_FBgn0052006:4_FBgn0052006:5	4	173548	173609	1.12755	0.00636083	62
FBgn0039890	intron_FBgn0039890:5_FBgn0039890:4	4	206543	206603	0.953613	0.0370427	61
FBgn0039890	intron_FBgn0039890:6_FBgn0039890:5	4	207467	208622	1.18382	0.0434177	1156
FBgn0024811	intron_FBgn0024811:6_FBgn0024811:7	4	231307	232215	0.61312	0.0350311	909
FBgn0039897	intron_FBgn0039897:2_FBgn0039897:5	4	252227	252560	0.718006	0.0134095	334
FBgn0039897	intron_FBgn0039897:15_FBgn0039897:17	4	263306	263795	0.584635	0.0484086	490
FBgn0259214	intron_FBgn0259214:14_FBgn0259214:13	4	370670	371228	0.647319	0.0115573	559
FBgn0016126	intron_FBgn0016126:10_FBgn0016126:11	4	470943	470996	-0.50574	0.0107318	54
FBgn0019650	intron_FBgn0019650:8_FBgn0019650:9	4	1025039	1025095	-1.36432	0.0105575	57
FBgn0019650	intron_FBgn0019650:9_FBgn0019650:10	4	1025245	1026432	-1.28814	0.0383719	1188
FBgn0011642	intron_FBgn0011642:7_FBgn0011642:6	4	1079978	1080044	0.720199	0.00963115	67
FBgn0250819	intron_FBgn0250819:11_FBgn0250819:12	4	1210635	1210692	0.609803	0.0030002	58

## Sheet: Dmel PanvsMaine 21C
Gene_ID	FlyBase intron name	Chromosome	Location_min	Location_max	Log2 fold change	Adjusted P-value	Intron size
FBgn0001125	intron_FBgn0001125:2_FBgn0001125:1	2L	1985402	1985470	-0.489673	0.000380302	69
FBgn0001125	intron_FBgn0001125:3_FBgn0001125:2	2L	1985720	1985781	-0.66607	0.00578529	62
FBgn0031418	intron_FBgn0031418:2_FBgn0031418:1	2L	2372771	2372829	-0.730684	0.000981162	59
FBgn0031432	intron_FBgn0031432:4_FBgn0031432:3	2L	2563397	2563503	-0.870119	0.0272937	107
FBgn0031432	intron_FBgn0031432:5_FBgn0031432:4	2L	2563628	2563699	-0.887363	0.038661	72
FBgn0250786	intron_FBgn0250786:5_FBgn0250786:4	2L	2980575	2980635	-0.60583	0.0485442	61
FBgn0021967	intron_FBgn0021967:2_FBgn0021967:4	2L	3466417	3466786	0.35581	0.0466231	370
FBgn0031546	intron_FBgn0031546:3_FBgn0031546:4	2L	3521309	3521367	-0.673641	0.0485442	59
FBgn0000721	intron_FBgn0000721:4_FBgn0000721:3	2L	3623196	3623261	-0.986708	0.00792806	66
FBgn0040705	intron_FBgn0040705:1_FBgn0040705:2	2L	4454827	4454887	0.806069	0.00837452	61
FBgn0031690	intron_FBgn0031690:9_FBgn0031690:6	2L	5214024	5214316	-0.611538	0.0326856	293
FBgn0027932	intron_FBgn0027932:6_FBgn0027932:8	2L	8427554	8427614	-0.73009	0.00914979	61
FBgn0004363	intron_FBgn0004363:9_FBgn0004363:5	2L	10848864	10850753	0.540413	0.0185512	1890
FBgn0032382	intron_FBgn0032382:2_FBgn0032382:4	2L	11851552	11851617	-0.731467	0.0037587	66
FBgn0020443	intron_FBgn0020443:4_FBgn0020443:5	2L	12437999	12438071	-0.61274	0.0428057	73
FBgn0032495	intron_FBgn0032495:2_FBgn0032495:3	2L	13249539	13249603	-0.803856	0.00718534	65
FBgn0051820	intron_FBgn0051820:3_FBgn0051820:1	2L	16006095	16006166	1.12073	0.000750119	72
FBgn0051820	intron_FBgn0051820:3_FBgn0051820:2	2L	16006116	16006166	0.943966	0.0105472	51
FBgn0259151	intron_FBgn0259151:6_FBgn0259151:5	2L	16339425	16339547	-0.975541	0.000242036	123
FBgn0040985	intron_FBgn0040985:2_FBgn0040985:1	2L	16887678	16887792	0.525214	0.00662925	115
FBgn0000120	intron_FBgn0000120:4_FBgn0000120:6	2L	18080087	18080146	0.983792	0.00192372	60
FBgn0032721	intron_FBgn0032721:8_FBgn0032721:7	2L	18859076	18859136	0.640364	0.0485442	61
FBgn0046302	intron_FBgn0046302:3_FBgn0046302:1	2L	18993992	18994136	-0.592155	0.0485442	145
FBgn0086710	intron_FBgn0086710:5_FBgn0086710:4	2L	19009138	19009204	0.557329	0.0170606	67
FBgn0003475	intron_FBgn0003475:8_FBgn0003475:10	2L	20336550	20339244	-0.513301	0.021781	2695
FBgn0032946	intron_FBgn0032946:7_FBgn0032946:9	2L	21385398	21388502	0.381613	0.0485442	3105
FBgn0032946	intron_FBgn0032946:9_FBgn0032946:10	2L	21388670	21388731	0.327483	0.0259264	62
FBgn0064225	intron_FBgn0064225:8_FBgn0064225:5	2L	22429111	22429268	1.84824	8.72129e-06	158
FBgn0033027	intron_FBgn0033027:5_FBgn0033027:4	2R	1394300	1395188	1.35378	0.0373257	889
FBgn0033079	intron_FBgn0033079:5_FBgn0033079:4	2R	2532189	2532246	-0.619567	0.033946	58
FBgn0027066	intron_FBgn0027066:8_FBgn0027066:9	2R	2641944	2642206	-0.549704	0.0493449	263
FBgn0000473	intron_FBgn0000473:2_FBgn0000473:1	2R	2667767	2667835	-0.824556	0.00176191	69
FBgn0015039	intron_FBgn0015039:3_FBgn0015039:2	2R	3018745	3018816	-0.91066	0.0305784	72
FBgn0263593	intron_FBgn0263593:14_FBgn0263593:12	2R	4029534	4029603	-0.662146	0.0327308	70
FBgn0033296	intron_FBgn0033296:3_FBgn0033296:2	2R	4357360	4357583	-0.646202	0.0314223	224
FBgn0033367	intron_FBgn0033367:3_FBgn0033367:2	2R	4930933	4930990	-0.767751	0.0485442	58
FBgn0053774	intron_FBgn0053774:2_FBgn0053774:1	2R	5287374	5287452	0.835753	0.00905512	79
FBgn0027580	intron_FBgn0027580:2_FBgn0027580:1	2R	5738891	5738958	-0.522097	0.0105146	68
FBgn0040773	intron_FBgn0040773:3_FBgn0040773:5	2R	5937150	5937257	0.859541	3.72518e-05	108
FBgn0004907	intron_FBgn0004907:2_FBgn0004907:7	2R	5987356	5991760	0.590217	0.0359464	4405
FBgn0033518	intron_FBgn0033518:2_FBgn0033518:3	2R	6306830	6306892	-0.591292	0.0485442	63
FBgn0050489	intron_FBgn0050489:3_FBgn0050489:2	2R	7008812	7008865	-1.4139	0.00135851	54
FBgn0053503	intron_FBgn0053503:3_FBgn0053503:2	2R	7012578	7012631	-1.56832	2.5494e-05	54
FBgn0025454	intron_FBgn0025454:2_FBgn0025454:4	2R	8074408	8074472	-0.819171	0.00293823	65
FBgn0025454	intron_FBgn0025454:4_FBgn0025454:5	2R	8075274	8075333	-0.735845	0.000874801	60
FBgn0050042	intron_FBgn0050042:2_FBgn0050042:3	2R	8266542	8266593	-0.656626	0.0037587	52
FBgn0250842	intron_FBgn0250842:3_FBgn0250842:1	2R	8733398	8733460	-0.901412	0.013179	63
FBgn0033777	intron_FBgn0033777:3_FBgn0033777:1	2R	8737402	8737465	-0.596833	0.00203637	64
FBgn0033777	intron_FBgn0033777:4_FBgn0033777:2	2R	8737544	8737603	-0.465223	0.0238078	60
FBgn0033787	intron_FBgn0033787:3_FBgn0033787:4	2R	8842168	8842280	-0.668223	0.0291975	113
FBgn0085468	intron_FBgn0085468:1_FBgn0085468:2	2R	9046352	9046521	0.571767	0.010219	170
FBgn0085468	intron_FBgn0085468:2_FBgn0085468:3	2R	9046609	9047038	0.618207	0.0485442	430
FBgn0033807	intron_FBgn0033807:6_FBgn0033807:4	2R	9101437	9101923	1.07077	1.32127e-05	487
FBgn0040754	intron_FBgn0040754:1_FBgn0040754:2	2R	9107961	9108270	0.473395	0.0464288	310
FBgn0053470	intron_FBgn0053470:2_FBgn0053470:3	2R	9299613	9299671	0.981134	0.000828446	59
FBgn0033879	intron_FBgn0033879:2_FBgn0033879:1	2R	9740621	9740685	-0.565902	0.0101886	65
FBgn0033886	intron_FBgn0033886:5_FBgn0033886:3	2R	9846904	9847072	-0.734198	0.0036933	169
FBgn0013770	intron_FBgn0013770:1_FBgn0013770:3	2R	9848382	9849724	0.976672	0.00367309	1343
FBgn0033913	intron_FBgn0033913:5_FBgn0033913:6	2R	10116801	10116917	-0.954461	0.0135134	117
FBgn0013771	intron_FBgn0013771:2_FBgn0013771:1	2R	10767683	10767735	-0.669019	0.0263008	53
FBgn0034091	intron_FBgn0034091:4_FBgn0034091:2	2R	12092260	12092329	-0.613172	0.0466231	70
FBgn0004784	intron_FBgn0004784:10_FBgn0004784:11	2R	12788729	12788789	0.459462	0.0359464	61
FBgn0034328	intron_FBgn0034328:2_FBgn0034328:1	2R	14270587	14270650	1.07365	0.025926	64
FBgn0034329	intron_FBgn0034329:1_FBgn0034329:2	2R	14271586	14271654	1.11526	0.0138241	69
FBgn0034398	intron_FBgn0034398:2_FBgn0034398:1	2R	14721290	14721469	-0.449666	0.0439984	180
FBgn0263395	intron_FBgn0263395:16_FBgn0263395:17	2R	15113479	15113544	-0.607755	0.0359464	66
FBgn0040732	intron_FBgn0040732:2_FBgn0040732:1	2R	15388145	15388220	-0.785466	0.019329	76
FBgn0034506	intron_FBgn0034506:4_FBgn0034506:5	2R	16232043	16232154	-0.724045	0.0185512	112
FBgn0040653	intron_FBgn0040653:2_FBgn0040653:1	2R	16756628	16756686	1.19862	3.72518e-05	59
FBgn0010470	intron_FBgn0010470:3_FBgn0010470:1	2R	17375351	17375523	-0.445522	0.038661	173
FBgn0054040	intron_FBgn0054040:2_FBgn0054040:1	2R	17720600	17720670	-1.44855	0.00011888	71
FBgn0243516	intron_FBgn0243516:8_FBgn0243516:6	2R	17997866	17998050	-0.66901	0.0166458	185
FBgn0050278	intron_FBgn0050278:2_FBgn0050278:1	2R	18105494	18105545	-0.709557	0.00200782	52
FBgn0034758	intron_FBgn0034758:2_FBgn0034758:4	2R	18545781	18546427	-0.744418	0.0243544	647
FBgn0010078	intron_FBgn0010078:1_FBgn0010078:2	2R	18741936	18742002	0.85326	0.00443756	67
FBgn0034902	intron_FBgn0034902:1_FBgn0034902:2	2R	19640429	19640487	1.23925	0.0244553	59
FBgn0259209	intron_FBgn0259209:1_FBgn0259209:4	2R	19962593	19962721	0.972267	0.0243544	129
FBgn0259209	intron_FBgn0259209:4_FBgn0259209:5	2R	19962861	19962971	0.76912	0.0327308	111
FBgn0011694	intron_FBgn0011694:2_FBgn0011694:1	2R	21061636	21061690	0.793021	0.0170606	55
FBgn0020908	intron_FBgn0020908:7_FBgn0020908:6	2RHet	1738192	1742063	0.631201	0.0243544	3872
FBgn0003138	intron_FBgn0003138:6_FBgn0003138:5	3L	1345162	1345497	-0.676862	0.0464288	336
FBgn0035217	intron_FBgn0035217:1_FBgn0035217:2	3L	1417391	1417446	-0.784749	0.0478052	56
FBgn0035227	intron_FBgn0035227:2_FBgn0035227:1	3L	1523857	1523913	-0.745777	0.0101886	57
FBgn0026372	intron_FBgn0026372:2_FBgn0026372:1	3L	1667736	1667808	-0.37356	0.0243863	73
FBgn0052299	intron_FBgn0052299:4_FBgn0052299:2	3L	2390186	2390268	-0.723098	0.0367009	83
FBgn0266696	intron_FBgn0266696:25_FBgn0266696:28	3L	2461269	2463056	-0.606438	0.0327308	1788
FBgn0266696	intron_FBgn0266696:42_FBgn0266696:43	3L	2498347	2498405	-0.882842	0.0211341	59
FBgn0035358	intron_FBgn0035358:2_FBgn0035358:1	3L	2642888	2643194	-0.781445	0.0250365	307
FBgn0035397	intron_FBgn0035397:17_FBgn0035397:18	3L	3085801	3085864	-0.572491	0.0276436	64
FBgn0001233	intron_FBgn0001233:1_FBgn0001233:3	3L	3193368	3194498	0.902115	0.0037587	1131
FBgn0027552	intron_FBgn0027552:2_FBgn0027552:1	3L	3941305	3941371	-0.526588	0.0426251	67
FBgn0027552	intron_FBgn0027552:3_FBgn0027552:2	3L	3941570	3941625	-0.639657	0.000130469	56
FBgn0027552	intron_FBgn0027552:5_FBgn0027552:4	3L	3942037	3942102	-0.649863	0.000223669	66
FBgn0035497	intron_FBgn0035497:10_FBgn0035497:7	3L	4096979	4097506	-0.975104	0.00228786	528
FBgn0035499	intron_FBgn0035499:2_FBgn0035499:1	3L	4115143	4115304	-0.786433	0.00914979	162
FBgn0035517	intron_FBgn0035517:3_FBgn0035517:4	3L	4255731	4255799	0.689864	0.0370255	69
FBgn0042119	intron_FBgn0042119:2_FBgn0042119:1	3L	6124706	6125047	0.441781	0.0185512	342
FBgn0000121	intron_FBgn0000121:2_FBgn0000121:1	3L	8640746	8640807	0.317856	0.0244713	62
FBgn0019644	intron_FBgn0019644:1_FBgn0019644:2	3L	9723196	9723411	0.81461	0.0327308	216
FBgn0026160	intron_FBgn0026160:5_FBgn0026160:6	3L	10863980	10864429	-0.528588	0.0173673	450
FBgn0036255	intron_FBgn0036255:1_FBgn0036255:2	3L	12130192	12130258	0.605426	0.0240047	67
FBgn0036285	intron_FBgn0036285:7_FBgn0036285:6	3L	12420913	12425175	-0.695281	0.0106743	4263
FBgn0040813	intron_FBgn0040813:2_FBgn0040813:3	3L	13349953	13350107	0.565049	0.0487483	155
FBgn0061515	intron_FBgn0061515:4_FBgn0061515:2	3L	14023521	14023906	-0.538648	0.0334631	386
FBgn0036449	intron_FBgn0036449:3_FBgn0036449:1	3L	14770086	14770438	-0.733169	0.0083951	353
FBgn0036449	intron_FBgn0036449:4_FBgn0036449:3	3L	14770708	14770777	-1.0104	0.00263393	70
FBgn0036449	intron_FBgn0036449:5_FBgn0036449:4	3L	14770867	14771032	-0.849315	0.0147283	166
FBgn0036449	intron_FBgn0036449:7_FBgn0036449:6	3L	14771378	14771439	-0.710756	0.0364082	62
FBgn0053258	intron_FBgn0053258:2_FBgn0053258:3	3L	16076190	16076259	-0.79484	0.0171457	70
FBgn0036623	intron_FBgn0036623:9_FBgn0036623:5	3L	16377214	16378919	0.684115	0.0256722	1706
FBgn0063485	intron_FBgn0063485:7_FBgn0063485:5	3L	16672970	16673911	-0.913924	0.0243544	942
FBgn0036820	intron_FBgn0036820:3_FBgn0036820:4	3L	18862747	18862806	0.640853	0.00271354	60
FBgn0028695	intron_FBgn0028695:1_FBgn0028695:2	3L	19910214	19910282	-0.737229	0.0330204	69
FBgn0036945	intron_FBgn0036945:1_FBgn0036945:3	3L	20181715	20181775	0.991712	0.00192372	61
FBgn0036945	intron_FBgn0036945:4_FBgn0036945:5	3L	20182289	20182419	1.38283	7.39133e-11	131
FBgn0036969	intron_FBgn0036969:2_FBgn0036969:3	3L	20314302	20314368	-1.12292	2.5494e-05	67
FBgn0037090	intron_FBgn0037090:4_FBgn0037090:5	3L	21496464	21496521	-0.577188	0.0444234	58
FBgn0037098	intron_FBgn0037098:3_FBgn0037098:2	3L	21537369	21537425	0.548696	0.0466231	57
FBgn0043783	intron_FBgn0043783:1_FBgn0043783:2	3L	21630413	21631246	-0.327053	0.0173673	834
FBgn0000045	intron_FBgn0000045:2_FBgn0000045:4	3L	21979376	21979737	-0.717525	0.0216282	362
FBgn0000100	intron_FBgn0000100:2_FBgn0000100:4	3L	22069237	22069347	0.610111	0.0359464	111
FBgn0053170	intron_FBgn0053170:2_FBgn0053170:4	3L	22858026	22858870	0.496638	0.0485442	845
FBgn0040001	intron_FBgn0040001:2_FBgn0040001:1	3LHet	1136334	1136393	0.608378	0.0125163	60
FBgn0037230	intron_FBgn0037230:2_FBgn0037230:1	3R	119090	119474	-0.577361	0.0185512	385
FBgn0037239	intron_FBgn0037239:4_FBgn0037239:6	3R	205341	205396	-0.53399	0.0173673	56
FBgn0261508	intron_FBgn0261508:2_FBgn0261508:1	3R	3318868	3318923	0.978629	0.00891153	56
FBgn0037547	intron_FBgn0037547:3_FBgn0037547:4	3R	3913734	3913799	0.509304	0.00547199	66
FBgn0046874	intron_FBgn0046874:5_FBgn0046874:4	3R	4603664	4604972	-0.670135	0.0446872	1309
FBgn0037654	intron_FBgn0037654:2_FBgn0037654:3	3R	4834353	4834435	-0.656302	0.0170606	83
FBgn0083953	intron_FBgn0083953:2_FBgn0083953:1	3R	5225663	5225718	0.64239	0.0292511	56
FBgn0020910	intron_FBgn0020910:3_FBgn0020910:6	3R	7048452	7049116	-0.509311	0.00513494	665
FBgn0037934	intron_FBgn0037934:2_FBgn0037934:1	3R	7506925	7506984	-0.799431	2.34481e-05	60
FBgn0037936	intron_FBgn0037936:2_FBgn0037936:1	3R	7514364	7514428	-0.616099	0.0485442	65
FBgn0038000	intron_FBgn0038000:2_FBgn0038000:3	3R	8048935	8048994	-0.606599	0.0293202	60
FBgn0002719	intron_FBgn0002719:2_FBgn0002719:1	3R	8539870	8539925	-0.450311	0.00476559	56
FBgn0052473	intron_FBgn0052473:8_FBgn0052473:9	3R	9136831	9136895	-0.51829	0.0138858	65
FBgn0038167	intron_FBgn0038167:3_FBgn0038167:4	3R	9502667	9502737	-0.954246	0.00122896	71
FBgn0038208	intron_FBgn0038208:3_FBgn0038208:2	3R	9976935	9977015	-0.614731	0.00475662	81
FBgn0038236	intron_FBgn0038236:6_FBgn0038236:7	3R	10348469	10348535	0.590066	0.00644743	67
FBgn0038271	intron_FBgn0038271:3_FBgn0038271:4	3R	10716149	10716417	0.728716	0.0330204	269
FBgn0038347	intron_FBgn0038347:2_FBgn0038347:1	3R	11358230	11358289	-0.522277	0.0292511	60
FBgn0038488	intron_FBgn0038488:7_FBgn0038488:6	3R	12973074	12973136	-0.490229	0.0475125	63
FBgn0025456	intron_FBgn0025456:7_FBgn0025456:5	3R	13219989	13220257	0.756591	0.000263069	269
FBgn0038570	intron_FBgn0038570:3_FBgn0038570:2	3R	13991883	13992076	0.475834	0.0327308	194
FBgn0020238	intron_FBgn0020238:1_FBgn0020238:3	3R	14068632	14073154	-0.860568	0.00905512	4523
FBgn0038598	intron_FBgn0038598:3_FBgn0038598:2	3R	14113267	14113323	-0.706681	0.00926548	57
FBgn0038700	intron_FBgn0038700:3_FBgn0038700:4	3R	15214177	15214236	-1.07541	0.0166458	60
FBgn0038702	intron_FBgn0038702:3_FBgn0038702:4	3R	15220094	15220148	-0.692699	0.0478052	55
FBgn0051221	intron_FBgn0051221:1_FBgn0051221:2	3R	15238487	15241354	0.866629	0.00206151	2868
FBgn0038718	intron_FBgn0038718:3_FBgn0038718:4	3R	15436867	15436925	-0.551491	0.0475125	59
FBgn0053192	intron_FBgn0053192:1_FBgn0053192:2	3R	16360764	16360829	-0.747195	0.0191076	66
FBgn0038829	intron_FBgn0038829:4_FBgn0038829:3	3R	16646521	16646867	-0.619695	0.00644743	347
FBgn0038878	intron_FBgn0038878:5_FBgn0038878:4	3R	17101303	17101360	0.706548	0.00011888	58
FBgn0261060	intron_FBgn0261060:2_FBgn0261060:1	3R	17561853	17561911	0.973173	0.0173673	59
FBgn0054034	intron_FBgn0054034:3_FBgn0054034:2	3R	17564661	17564722	1.31896	0.00151594	62
FBgn0051198	intron_FBgn0051198:2_FBgn0051198:3	3R	17580980	17581123	-0.706663	0.0439219	144
FBgn0038923	intron_FBgn0038923:1_FBgn0038923:2	3R	17849355	17849418	0.699887	0.0185512	64
FBgn0040582	intron_FBgn0040582:3_FBgn0040582:5	3R	17913082	17913150	1.03493	1.58569e-05	69
FBgn0259736	intron_FBgn0259736:3_FBgn0259736:4	3R	17952189	17954968	-0.770969	0.0428057	2780
FBgn0038947	intron_FBgn0038947:4_FBgn0038947:6	3R	18183394	18184093	0.645576	0.0428057	700
FBgn0038972	intron_FBgn0038972:1_FBgn0038972:2	3R	18291398	18291458	-0.538414	0.0427213	61
FBgn0039050	intron_FBgn0039050:4_FBgn0039050:5	3R	18918741	18918803	-1.08775	0.00320132	63
FBgn0039114	intron_FBgn0039114:7_FBgn0039114:8	3R	19591419	19591597	-0.586662	0.00943691	179
FBgn0039114	intron_FBgn0039114:8_FBgn0039114:9	3R	19591789	19591851	-0.690935	0.0170606	63
FBgn0260634	intron_FBgn0260634:7_FBgn0260634:6	3R	19642753	19643948	-0.847005	0.0327308	1196
FBgn0045866	intron_FBgn0045866:2_FBgn0045866:3	3R	20865544	20865607	-0.726875	0.00176191	64
FBgn0051288	intron_FBgn0051288:2_FBgn0051288:1	3R	21123924	21123989	-0.589443	0.0439984	66
FBgn0040606	intron_FBgn0040606:4_FBgn0040606:1	3R	22250742	22250798	0.822928	0.0346108	57
FBgn0051072	intron_FBgn0051072:6_FBgn0051072:5	3R	22672732	22674382	-0.914036	0.0191076	1651
FBgn0039492	intron_FBgn0039492:5_FBgn0039492:4	3R	22953489	22953558	-0.798208	0.0146761	70
FBgn0029155	intron_FBgn0029155:5_FBgn0029155:7	3R	22981795	22981862	-0.521785	0.0326856	68
FBgn0039635	intron_FBgn0039635:8_FBgn0039635:9	3R	24941409	24941469	-0.474133	0.0166904	61
FBgn0003358	intron_FBgn0003358:2_FBgn0003358:1	3R	25751577	25751633	-1.7701	2.34481e-05	57
FBgn0015221	intron_FBgn0015221:5_FBgn0015221:9	3R	26215051	26215418	-0.522663	0.0485442	368
FBgn0039768	intron_FBgn0039768:3_FBgn0039768:4	3R	26256751	26256811	-0.932164	0.00476559	61
FBgn0000313	intron_FBgn0000313:3_FBgn0000313:2	3R	27030713	27030772	0.75626	0.0259264	60
FBgn0069923	intron_FBgn0069923:2_FBgn0069923:1	3RHet	1806715	1808341	0.864632	0.00228786	1627
FBgn0028969	intron_FBgn0028969:3_FBgn0028969:2	X	1754016	1754089	-0.556438	0.0420281	74
FBgn0023549	intron_FBgn0023549:9_FBgn0023549:10	X	2098743	2098797	-1.05227	0.0213352	55
FBgn0029752	intron_FBgn0029752:2_FBgn0029752:1	X	5205160	5205226	-0.55239	0.0190017	67
FBgn0029897	intron_FBgn0029897:3_FBgn0029897:1	X	6636290	6637090	-0.394092	0.0373257	801
FBgn0261592	intron_FBgn0261592:3_FBgn0261592:1	X	7794323	7794835	-0.525741	0.0127633	513
FBgn0003656	intron_FBgn0003656:2_FBgn0003656:1	X	7851832	7851898	-0.646491	0.0310518	67
FBgn0030245	intron_FBgn0030245:3_FBgn0030245:2	X	10765499	10765561	-0.617905	0.0439984	63
FBgn0020255	intron_FBgn0020255:6_FBgn0020255:4	X	11040462	11042518	0.420388	0.025926	2057
FBgn0030332	intron_FBgn0030332:2_FBgn0030332:1	X	11657857	11657938	-1.02194	0.00249616	82
FBgn0262687	intron_FBgn0262687:2_FBgn0262687:1	X	11813340	11813391	1.13308	0.00192372	52
FBgn0052657	intron_FBgn0052657:2_FBgn0052657:3	X	11981473	11981530	0.8732	0.0429107	58
FBgn0265726	intron_FBgn0265726:14_FBgn0265726:15	X	13607175	13607233	-0.624859	0.0271059	59
FBgn0027556	intron_FBgn0027556:7_FBgn0027556:10	X	16829755	16830536	-0.563588	0.0476364	782
FBgn0030999	intron_FBgn0030999:1_FBgn0030999:2	X	19107440	19107509	-0.61113	0.0265932	70

## Sheet: Dsim PanvsMaine 29C
Gene_ID	FlyBase intron name	Chromosome	Location_min	Location_max	Log2 fold change	Adjusted P-value	Intron size
FBgn0194388	intron_dsim_GLEANR_6736:3_dsim_GLEANR_6736:4	2L	20058	20114	-0.92298	0.040943	57
FBgn0194393	intron_dsim_GLEANR_6741:4_dsim_GLEANR_6741:5	2L	112256	113866	0.544357	0.029456	1611
FBgn0194381	intron_dsim_GLEANR_6729:7_dsim_GLEANR_6729:8	2L	118604	118662	1.09432	0.0343192	59
FBgn0194408	intron_dsim_GLEANR_6758:10_dsim_GLEANR_6758:11	2L	360407	362172	-0.888403	0.014298	1766
FBgn0194414	intron_dsim_GLEANR_6763:1_dsim_GLEANR_6763:2	2L	426631	426781	-0.722483	0.000175539	151
FBgn0194457	intron_dsim_GLEANR_6806:3_dsim_GLEANR_6806:4	2L	1052808	1052870	0.671827	0.0104341	63
FBgn0194305	intron_dsim_GLEANR_6652:4_dsim_GLEANR_6652:5	2L	1332547	1332606	1.12833	0.0068421	60
FBgn0194502	intron_dsim_GLEANR_6852:4_dsim_GLEANR_6852:5	2L	1734935	1736113	0.779869	0.0165007	1179
FBgn0194502	intron_dsim_GLEANR_6852:9_dsim_GLEANR_6852:10	2L	1740173	1740799	0.769816	0.0175785	627
FBgn0194507	intron_dsim_GLEANR_6857:11_dsim_GLEANR_6857:12	2L	1843009	1843656	-0.832799	0.0363292	648
FBgn0194509	intron_dsim_GLEANR_6859:16_dsim_GLEANR_6859:17	2L	1910128	1910248	-0.595864	0.0138125	121
FBgn0194513	intron_dsim_GLEANR_6863:1_dsim_GLEANR_6863:2	2L	1953622	1953679	-0.588477	0.000165302	58
FBgn0194519	intron_dsim_GLEANR_6869:1_dsim_GLEANR_6869:2	2L	2015540	2015597	-0.757731	0.0402756	58
FBgn0194522	intron_dsim_GLEANR_6872:2_dsim_GLEANR_6872:3	2L	2088384	2088453	-0.632283	0.00943913	70
FBgn0194263	intron_dsim_GLEANR_6611:1_dsim_GLEANR_6611:2	2L	2146215	2146279	0.930464	0.00396871	65
FBgn0194204	intron_dsim_GLEANR_6554:1_dsim_GLEANR_6554:2	2L	2710472	2710535	-0.846886	0.000492429	64
FBgn0194577	intron_dsim_GLEANR_6928:1_dsim_GLEANR_6928:2	2L	2817172	2817242	-0.535301	0.0479988	71
FBgn0194611	intron_dsim_GLEANR_6961:4_dsim_GLEANR_6961:5	2L	3269779	3269837	0.855806	0.00597061	59
FBgn0020076	intron_dsim_GLEANR_6496:14_dsim_GLEANR_6496:15	2L	3448013	3448895	-0.766554	0.029456	883
FBgn0020076	intron_dsim_GLEANR_6496:13_dsim_GLEANR_6496:14	2L	3449295	3452746	-0.825617	0.00673282	3452
FBgn0020076	intron_dsim_GLEANR_6496:12_dsim_GLEANR_6496:13	2L	3452849	3452934	-0.643379	0.0138072	86
FBgn0020076	intron_dsim_GLEANR_6496:3_dsim_GLEANR_6496:4	2L	3455940	3456051	-0.954749	0.0210225	112
FBgn0194131	intron_dsim_GLEANR_6478:1_dsim_GLEANR_6478:2	2L	3653901	3653960	0.918816	0.000275648	60
FBgn0044195	intron_dsim_GLEANR_7010:3_dsim_GLEANR_7010:4	2L	4079044	4079106	1.39593	0.000526416	63
FBgn0194110	intron_dsim_GLEANR_6457:4_dsim_GLEANR_6457:5	2L	4316001	4316053	0.969437	0.0363292	53
FBgn0194694	intron_dsim_GLEANR_7046:4_dsim_GLEANR_7046:5	2L	4772589	4772656	0.800084	0.00208932	68
FBgn0194034	intron_dsim_GLEANR_6381:3_dsim_GLEANR_6381:4	2L	5531340	5531552	-0.583055	0.0192409	213
FBgn0194034	intron_dsim_GLEANR_6381:1_dsim_GLEANR_6381:2	2L	5532208	5532263	0.960916	0.000182502	56
FBgn0012820	intron_dsim_GLEANR_6371:1_dsim_GLEANR_6371:2	2L	5684515	5684570	0.644008	0.0238368	56
FBgn0194788	intron_dsim_GLEANR_7140:3_dsim_GLEANR_7140:4	2L	6150955	6151014	-0.764153	0.00731683	60
FBgn0194800	intron_dsim_GLEANR_7152:1_dsim_GLEANR_7152:2	2L	6289331	6289387	0.699363	0.0204517	57
FBgn0194809	intron_dsim_GLEANR_7163:1_dsim_GLEANR_7163:2	2L	6463551	6463626	-0.483186	0.0219655	76
FBgn0194815	intron_dsim_GLEANR_7169:2_dsim_GLEANR_7169:3	2L	6605146	6605202	0.512389	0.029456	57
FBgn0194848	intron_dsim_GLEANR_7203:2_dsim_GLEANR_7203:3	2L	7193288	7193351	0.798393	0.0238368	64
FBgn0193897	intron_dsim_GLEANR_6243:1_dsim_GLEANR_6243:2	2L	7223256	7224674	1.1788	1.66167e-05	1419
FBgn0193885	intron_dsim_GLEANR_6232:11_dsim_GLEANR_6232:12	2L	7444613	7446091	-0.81655	0.00206488	1479
FBgn0194862	intron_dsim_GLEANR_7217:2_dsim_GLEANR_7217:3	2L	7508425	7508479	1.40439	0.0194501	55
FBgn0193875	intron_dsim_GLEANR_6223:1_dsim_GLEANR_6223:2	2L	7534054	7534208	-1.60983	3.13088e-10	155
FBgn0193873	intron_dsim_GLEANR_6221:1_dsim_GLEANR_6221:2	2L	7545421	7545728	-0.630293	0.0199966	308
FBgn0194866	intron_dsim_GLEANR_7221:1_dsim_GLEANR_7221:2	2L	7576279	7576347	1.21447	0.0170577	69
FBgn0193867	intron_dsim_GLEANR_6215:1_dsim_GLEANR_6215:2	2L	7622693	7622771	-0.486456	0.0120974	79
FBgn0193851	intron_dsim_GLEANR_6198:3_dsim_GLEANR_6198:4	2L	7798410	7798476	1.01953	0.0216863	67
FBgn0193834	intron_dsim_GLEANR_6181:1_dsim_GLEANR_6181:2	2L	8001412	8001471	1.00047	0.0236692	60
FBgn0193818	intron_dsim_GLEANR_6165:1_dsim_GLEANR_6165:2	2L	8149873	8150097	-0.520624	0.0265042	225
FBgn0194908	intron_dsim_GLEANR_7265:4_dsim_GLEANR_7265:5	2L	8153405	8153467	1.32095	0.000512424	63
FBgn0194931	intron_dsim_GLEANR_7288:3_dsim_GLEANR_7288:4	2L	8297468	8297555	0.650062	0.00901358	88
FBgn0194932	intron_dsim_GLEANR_7289:2_dsim_GLEANR_7289:3	2L	8299805	8300263	-0.685161	0.00667887	459
FBgn0193783	intron_dsim_GLEANR_6128:1_dsim_GLEANR_6128:2	2L	8720417	8720768	1.02017	0.013594	352
FBgn0194960	intron_dsim_GLEANR_7317:2_dsim_GLEANR_7317:3	2L	8786828	8786894	0.91751	7.13002e-05	67
FBgn0194978	intron_dsim_GLEANR_7335:1_dsim_GLEANR_7335:2	2L	9165143	9167038	0.371928	0.0498129	1896
FBgn0193761	intron_dsim_GLEANR_6106:1_dsim_GLEANR_6106:2	2L	9262428	9263521	0.429253	0.0351476	1094
FBgn0194987	intron_dsim_GLEANR_7345:2_dsim_GLEANR_7345:3	2L	9307887	9307966	-0.96384	0.00355865	80
FBgn0195009	intron_dsim_GLEANR_7367:2_dsim_GLEANR_7367:3	2L	9672864	9672979	-1.28191	0.00021853	116
FBgn0195028	intron_dsim_GLEANR_7386:1_dsim_GLEANR_7386:2	2L	9819693	9823524	-1.23091	0.0242732	3832
FBgn0195028	intron_dsim_GLEANR_7386:2_dsim_GLEANR_7386:3	2L	9823781	9823867	-1.17605	0.0204517	87
FBgn0195028	intron_dsim_GLEANR_7386:3_dsim_GLEANR_7386:4	2L	9823987	9824899	-1.19095	0.0230817	913
FBgn0195028	intron_dsim_GLEANR_7386:4_dsim_GLEANR_7386:5	2L	9825297	9825365	-1.32098	0.000245312	69
FBgn0193681	intron_dsim_GLEANR_6029:2_dsim_GLEANR_6029:3	2L	10107243	10107299	1.87975	0.0186839	57
FBgn0195056	intron_dsim_GLEANR_7414:5_dsim_GLEANR_7414:6	2L	10130071	10130132	1.26342	1.47385e-05	62
FBgn0195066	intron_dsim_GLEANR_7424:3_dsim_GLEANR_7424:4	2L	10173515	10173568	1.39942	0.00283502	54
FBgn0195070	intron_dsim_GLEANR_7428:1_dsim_GLEANR_7428:2	2L	10188011	10188069	-0.599549	0.0024284	59
FBgn0195070	intron_dsim_GLEANR_7428:11_dsim_GLEANR_7428:12	2L	10191859	10191925	1.06524	0.000505713	67
FBgn0195090	intron_dsim_GLEANR_7448:2_dsim_GLEANR_7448:3	2L	10336647	10336702	1.03207	0.0338654	56
FBgn0195094	intron_dsim_GLEANR_7453:2_dsim_GLEANR_7453:3	2L	10441847	10441932	-0.791944	0.00283963	86
FBgn0250852	intron_dsim_GLEANR_7454:4_dsim_GLEANR_7454:5	2L	10446470	10446520	-0.551895	0.0396654	51
FBgn0195112	intron_dsim_GLEANR_7474:2_dsim_GLEANR_7474:3	2L	10661451	10661504	-1.95297	1.02519e-05	54
FBgn0193613	intron_dsim_GLEANR_5962:1_dsim_GLEANR_5962:2	2L	10800800	10801050	-0.702019	0.00211658	251
FBgn0193587	intron_dsim_GLEANR_5935:3_dsim_GLEANR_5935:4	2L	11148705	11148757	2.02718	7.5458e-08	53
FBgn0195198	intron_dsim_GLEANR_7560:1_dsim_GLEANR_7560:2	2L	12040622	12073322	-0.560543	0.0189173	32701
FBgn0195198	intron_dsim_GLEANR_7560:5_dsim_GLEANR_7560:6	2L	12099197	12099260	-0.530608	9.73945e-06	64
FBgn0195198	intron_dsim_GLEANR_7560:6_dsim_GLEANR_7560:7	2L	12099559	12099657	-0.580327	0.00667887	99
FBgn0195299	intron_dsim_GLEANR_7662:1_dsim_GLEANR_7662:2	2L	13609480	13609606	0.864615	0.0115525	127
FBgn0193442	intron_dsim_GLEANR_5791:1_dsim_GLEANR_5791:2	2L	13688065	13688827	-1.43254	0.000502614	763
FBgn0193424	intron_dsim_GLEANR_5773:2_dsim_GLEANR_5773:3	2L	14094597	14094663	-0.938267	0.0216863	67
FBgn0193381	intron_dsim_GLEANR_5731:12_dsim_GLEANR_5731:13	2L	15013308	15013520	1.09347	0.000883172	213
FBgn0193381	intron_dsim_GLEANR_5731:5_dsim_GLEANR_5731:6	2L	15018454	15018515	0.727746	0.0193116	62
FBgn0195395	intron_dsim_GLEANR_7764:4_dsim_GLEANR_7764:5	2L	15761925	15761988	-0.761921	0.0291671	64
FBgn0044199	intron_dsim_GLEANR_7785:1_dsim_GLEANR_7785:2	2L	16163563	16163630	1.0012	5.0506e-06	68
FBgn0195463	intron_dsim_GLEANR_7832:6_dsim_GLEANR_7832:7	2L	17103537	17103590	0.598219	0.018286	54
FBgn0195465	intron_dsim_GLEANR_7834:3_dsim_GLEANR_7834:4	2L	17137495	17137555	0.796581	0.0059557	61
FBgn0195489	intron_dsim_GLEANR_7857:1_dsim_GLEANR_7857:2	2L	17831446	17831515	0.985144	0.0127641	70
FBgn0193219	intron_dsim_GLEANR_5563:8_dsim_GLEANR_5563:9	2L	18611470	18611738	0.896728	0.0444275	269
FBgn0193186	intron_dsim_GLEANR_5530:4_dsim_GLEANR_5530:5	2L	19069414	19069543	0.550957	0.00741426	130
FBgn0193173	intron_dsim_GLEANR_5516:1_dsim_GLEANR_5516:2	2L	19200047	19200453	-0.458454	0.0115037	407
FBgn0264798	intron_dsim_GLEANR_7944:4_dsim_GLEANR_7944:5	2L	19240199	19240269	1.12653	0.000274703	71
FBgn0264798	intron_dsim_GLEANR_7944:7_dsim_GLEANR_7944:8	2L	19243005	19243074	0.609184	0.00126577	70
FBgn0193149	intron_dsim_GLEANR_5492:1_dsim_GLEANR_5492:2	2L	19621477	19621529	-0.457344	0.0174289	53
FBgn0195603	intron_dsim_GLEANR_7977:5_dsim_GLEANR_7977:6	2L	19991199	19992230	0.524299	0.0158372	1032
FBgn0193102	intron_dsim_GLEANR_5444:3_dsim_GLEANR_5444:4	2L	20421957	20422023	-0.531017	0.00590211	67
FBgn0195648	intron_dsim_GLEANR_8025:13_dsim_GLEANR_8025:14	2L	20704204	20704269	-0.841131	0.039074	66
FBgn0182121	intron_dsim_GLEANR_10315:7_dsim_GLEANR_10315:8	2R	567196	567258	-0.712943	0.0375967	63
FBgn0182104	intron_dsim_GLEANR_10299:2_dsim_GLEANR_10299:3	2R	964548	964598	1.51004	8.06417e-05	51
FBgn0182190	intron_dsim_GLEANR_10405:2_dsim_GLEANR_10405:3	2R	1400089	1400144	1.33253	0.0194501	56
FBgn0182190	intron_dsim_GLEANR_10405:3_dsim_GLEANR_10405:4	2R	1400262	1400317	1.32749	0.00766316	56
FBgn0182192	intron_dsim_GLEANR_10407:3_dsim_GLEANR_10407:4	2R	1445316	1445365	-0.656485	0.0167419	50
FBgn0182215	intron_dsim_GLEANR_10430:1_dsim_GLEANR_10430:2	2R	1701151	1705112	0.950567	0.0137339	3962
FBgn0182219	intron_dsim_GLEANR_10434:3_dsim_GLEANR_10434:4	2R	1724279	1724335	0.927124	0.00743451	57
FBgn0182031	intron_dsim_GLEANR_10218:3_dsim_GLEANR_10218:4	2R	2053795	2053862	0.857355	0.0187992	68
FBgn0182027	intron_dsim_GLEANR_10214:7_dsim_GLEANR_10214:8	2R	2078670	2078731	0.504146	0.029456	62
FBgn0182259	intron_dsim_GLEANR_10473:1_dsim_GLEANR_10473:2	2R	2144687	2146949	-0.472642	0.0338696	2263
FBgn0182010	intron_dsim_GLEANR_10197:4_dsim_GLEANR_10197:5	2R	2215308	2219919	-0.759338	0.0364685	4612
FBgn0182279	intron_dsim_GLEANR_10493:3_dsim_GLEANR_10493:4	2R	2414245	2414302	0.623322	0.0470508	58
FBgn0181992	intron_dsim_GLEANR_10179:1_dsim_GLEANR_10179:2	2R	2430478	2430540	-0.842738	0.00509804	63
FBgn0182301	intron_dsim_GLEANR_10515:1_dsim_GLEANR_10515:2	2R	2585983	2586043	0.826953	0.0456445	61
FBgn0182316	intron_dsim_GLEANR_10530:2_dsim_GLEANR_10530:3	2R	2711760	2711919	-0.795543	0.0110031	160
FBgn0181958	intron_dsim_GLEANR_10144:1_dsim_GLEANR_10144:2	2R	2720087	2720162	0.713118	0.000860778	76
FBgn0182366	intron_dsim_GLEANR_10580:8_dsim_GLEANR_10580:9	2R	3334990	3335498	-0.552286	0.0363292	509
FBgn0182391	intron_dsim_GLEANR_10605:1_dsim_GLEANR_10605:2	2R	3627496	3631812	-1.38114	0.003964	4317
FBgn0182391	intron_dsim_GLEANR_10605:2_dsim_GLEANR_10605:3	2R	3632193	3632543	-1.43306	0.00056018	351
FBgn0182391	intron_dsim_GLEANR_10605:3_dsim_GLEANR_10605:4	2R	3632793	3633579	-1.64216	1.13664e-05	787
FBgn0182391	intron_dsim_GLEANR_10605:4_dsim_GLEANR_10605:5	2R	3633653	3634005	-1.48444	2.47151e-05	353
FBgn0181875	intron_dsim_GLEANR_10065:3_dsim_GLEANR_10065:4	2R	3699123	3699183	0.854605	0.000966607	61
FBgn0181853	intron_dsim_GLEANR_10043:1_dsim_GLEANR_10043:2	2R	3932836	3932961	-0.91534	0.0497656	126
FBgn0182431	intron_dsim_GLEANR_10643:6_dsim_GLEANR_10643:7	2R	4102256	4102312	-0.521946	0.0490805	57
FBgn0182465	intron_dsim_GLEANR_10678:2_dsim_GLEANR_10678:3	2R	4429885	4429940	-0.854751	0.039357	56
FBgn0197288	intron_dsim_GLEANR_9999:2_dsim_GLEANR_9999:3	2R	4549237	4549325	0.776294	0.0375401	89
FBgn0182479	intron_dsim_GLEANR_10693:5_dsim_GLEANR_10693:6	2R	4631974	4632026	-0.57006	0.000587485	53
FBgn0182481	intron_dsim_GLEANR_10695:4_dsim_GLEANR_10695:5	2R	4647703	4647775	-0.682598	0.0453738	73
FBgn0182502	intron_dsim_GLEANR_10714:1_dsim_GLEANR_10714:2	2R	4935159	4935221	1.33272	0.0199723	63
FBgn0182502	intron_dsim_GLEANR_10714:2_dsim_GLEANR_10714:3	2R	4935298	4935360	1.70073	1.02519e-05	63
FBgn0197262	intron_dsim_GLEANR_9971:2_dsim_GLEANR_9971:3	2R	4937124	4937186	0.689806	0.00643258	63
FBgn0182522	intron_dsim_GLEANR_10734:1_dsim_GLEANR_10734:2	2R	5299267	5299328	-0.627462	0.00319054	62
FBgn0197226	intron_dsim_GLEANR_9936:6_dsim_GLEANR_9936:7	2R	5324259	5324326	-0.546214	0.0359539	68
FBgn0197222	intron_dsim_GLEANR_9932:2_dsim_GLEANR_9932:3	2R	5550255	5550314	0.933018	0.0296458	60
FBgn0197221	intron_dsim_GLEANR_9931:2_dsim_GLEANR_9931:3	2R	5552727	5552786	1.28868	0.0262348	60
FBgn0182579	intron_dsim_GLEANR_10792:1_dsim_GLEANR_10792:2	2R	6262354	6262452	2.17762	3.38358e-07	99
FBgn0197156	intron_dsim_GLEANR_9864:1_dsim_GLEANR_9864:2	2R	6321259	6321324	0.705161	0.0103865	66
FBgn0182610	intron_dsim_GLEANR_10821:1_dsim_GLEANR_10821:2	2R	6608402	6608463	-1.22171	0.00206488	62
FBgn0182610	intron_dsim_GLEANR_10821:2_dsim_GLEANR_10821:3	2R	6609059	6609114	-0.48689	0.0095472	56
FBgn0182610	intron_dsim_GLEANR_10821:3_dsim_GLEANR_10821:4	2R	6609265	6609324	-0.484031	0.00867938	60
FBgn0182612	intron_dsim_GLEANR_10823:1_dsim_GLEANR_10823:2	2R	6614282	6619040	-1.08042	3.70131e-12	4759
FBgn0197130	intron_dsim_GLEANR_9838:1_dsim_GLEANR_9838:2	2R	6662708	6662770	-1.0193	0.00021853	63
FBgn0182640	intron_dsim_GLEANR_10850:1_dsim_GLEANR_10850:2	2R	6761130	6762303	-0.620628	0.0285636	1174
FBgn0182648	intron_dsim_GLEANR_10858:1_dsim_GLEANR_10858:2	2R	6789058	6789114	-1.16011	0.00064393	57
FBgn0197109	intron_dsim_GLEANR_9818:3_dsim_GLEANR_9818:4	2R	6953802	6954146	-1.0435	0.00675753	345
FBgn0182684	intron_dsim_GLEANR_10894:2_dsim_GLEANR_10894:3	2R	7158795	7158976	-0.688415	0.032872	182
FBgn0182693	intron_dsim_GLEANR_10902:2_dsim_GLEANR_10902:3	2R	7267929	7268050	-0.469616	0.0198995	122
FBgn0197081	intron_dsim_GLEANR_9789:1_dsim_GLEANR_9789:2	2R	7288357	7288423	0.954163	0.0236692	67
FBgn0197042	intron_dsim_GLEANR_9750:7_dsim_GLEANR_9750:8	2R	7778957	7779016	-0.447808	0.0298567	60
FBgn0182746	intron_dsim_GLEANR_10958:1_dsim_GLEANR_10958:2	2R	8156378	8158131	-0.471318	0.00601887	1754
FBgn0182746	intron_dsim_GLEANR_10958:2_dsim_GLEANR_10958:3	2R	8158300	8158357	-0.422733	0.0475372	58
FBgn0197016	intron_dsim_GLEANR_9723:8_dsim_GLEANR_9723:9	2R	8199301	8199365	0.592617	0.0177912	65
FBgn0196981	intron_dsim_GLEANR_9685:2_dsim_GLEANR_9685:3	2R	8866573	8866805	-0.749421	0.000451798	233
FBgn0196981	intron_dsim_GLEANR_9685:1_dsim_GLEANR_9685:2	2R	8866966	8867386	-1.0941	2.87746e-05	421
FBgn0196976	intron_dsim_GLEANR_9680:3_dsim_GLEANR_9680:4	2R	8913633	8913692	-0.889531	0.00375345	60
FBgn0182819	intron_dsim_GLEANR_11034:3_dsim_GLEANR_11034:4	2R	9156435	9156826	0.451801	0.0480958	392
FBgn0196939	intron_dsim_GLEANR_9644:5_dsim_GLEANR_9644:6	2R	9501016	9501086	1.08021	0.0220774	71
FBgn0196939	intron_dsim_GLEANR_9644:4_dsim_GLEANR_9644:5	2R	9501220	9501278	1.29383	0.00071247	59
FBgn0182841	intron_dsim_GLEANR_11059:1_dsim_GLEANR_11059:2	2R	9532959	9533021	0.731299	0.0154333	63
FBgn0196932	intron_dsim_GLEANR_9637:1_dsim_GLEANR_9637:2	2R	9536268	9536320	1.7885	2.24122e-05	53
FBgn0196931	intron_dsim_GLEANR_9636:2_dsim_GLEANR_9636:3	2R	9541975	9542026	1.05268	4.84147e-06	52
FBgn0196863	intron_dsim_GLEANR_9568:6_dsim_GLEANR_9568:7	2R	10621532	10621593	0.439728	0.0449475	62
FBgn0182919	intron_dsim_GLEANR_11137:2_dsim_GLEANR_11137:3	2R	10764718	10766106	-0.973156	0.000416298	1389
FBgn0182935	intron_dsim_GLEANR_11153:1_dsim_GLEANR_11153:2	2R	10903119	10903329	1.10169	0.039357	211
FBgn0196831	intron_dsim_GLEANR_9537:4_dsim_GLEANR_9537:5	2R	10945830	10945892	0.679799	2.6438e-06	63
FBgn0196831	intron_dsim_GLEANR_9537:3_dsim_GLEANR_9537:4	2R	10945992	10946049	0.589982	0.000175539	58
FBgn0069522	intron_dsim_GLEANR_9512:1_dsim_GLEANR_9512:2	2R	11370676	11370727	-0.749748	0.042736	52
FBgn0069520	intron_dsim_GLEANR_9509:1_dsim_GLEANR_9509:2	2R	11373399	11373455	0.768154	0.029456	57
FBgn0182973	intron_dsim_GLEANR_11193:1_dsim_GLEANR_11193:2	2R	11438991	11439051	0.943419	0.0291671	61
FBgn0183023	intron_dsim_GLEANR_11245:5_dsim_GLEANR_11245:6	2R	12109812	12109871	0.695188	0.0495486	60
FBgn0045613	intron_dsim_GLEANR_11251:2_dsim_GLEANR_11251:3	2R	12137179	12137243	-0.627694	0.0444275	65
FBgn0183056	intron_dsim_GLEANR_11278:1_dsim_GLEANR_11278:2	2R	12357586	12357649	1.105	0.029456	64
FBgn0196737	intron_dsim_GLEANR_9434:3_dsim_GLEANR_9434:4	2R	12392381	12392438	-0.592624	0.0189697	58
FBgn0196732	intron_dsim_GLEANR_9429:2_dsim_GLEANR_9429:3	2R	12408502	12408563	-0.913296	0.0186839	62
FBgn0183112	intron_dsim_GLEANR_11332:1_dsim_GLEANR_11332:2	2R	12992560	12992626	1.44631	3.80703e-06	67
FBgn0183113	intron_dsim_GLEANR_11333:1_dsim_GLEANR_11333:2	2R	12993168	12993227	-0.712377	0.00114867	60
FBgn0196692	intron_dsim_GLEANR_9389:1_dsim_GLEANR_9389:2	2R	12993924	12993977	-0.819051	0.0158372	54
FBgn0196646	intron_dsim_GLEANR_9345:3_dsim_GLEANR_9345:4	2R	13443967	13444158	0.811407	0.00376968	192
FBgn0196623	intron_dsim_GLEANR_9321:1_dsim_GLEANR_9321:2	2R	13994313	13995553	-0.635885	0.0367319	1241
FBgn0196617	intron_dsim_GLEANR_9315:1_dsim_GLEANR_9315:2	2R	14049357	14052512	-0.647816	0.0305277	3156
FBgn0183232	intron_dsim_GLEANR_11450:1_dsim_GLEANR_11450:2	2R	14414597	14414654	-1.92215	0.0114734	58
FBgn0183252	intron_dsim_GLEANR_11477:1_dsim_GLEANR_11477:2	2R	14893710	14893772	-0.650592	0.0195088	63
FBgn0183289	intron_dsim_GLEANR_11514:1_dsim_GLEANR_11514:2	2R	15486004	15486682	-0.709044	0.00317399	679
FBgn0183298	intron_dsim_GLEANR_11523:1_dsim_GLEANR_11523:2	2R	15568365	15568422	-0.955806	0.000209869	58
FBgn0183301	intron_dsim_GLEANR_11526:3_dsim_GLEANR_11526:4	2R	15631319	15631383	0.544552	0.00880129	65
FBgn0183308	intron_dsim_GLEANR_11533:1_dsim_GLEANR_11533:2	2R	15689150	15689212	-1.14292	0.000132577	63
FBgn0196533	intron_dsim_GLEANR_9220:10_dsim_GLEANR_9220:11	2R	15695929	15695987	-0.796052	0.0282446	59
FBgn0183318	intron_dsim_GLEANR_11543:1_dsim_GLEANR_11543:2	2R	15750219	15750284	-0.684861	0.00148384	66
FBgn0183328	intron_dsim_GLEANR_11553:7_dsim_GLEANR_11553:8	2R	15857257	15857325	-0.48028	0.0495486	69
FBgn0183340	intron_dsim_GLEANR_11564:1_dsim_GLEANR_11564:2	2R	16054628	16056966	-0.43492	0.0291921	2339
FBgn0183387	intron_dsim_GLEANR_11609:2_dsim_GLEANR_11609:3	2R	16645414	16645471	1.32928	0.000901862	58
FBgn0183428	intron_dsim_GLEANR_11648:2_dsim_GLEANR_11648:3	2R	17145321	17145373	0.958566	7.79923e-06	53
FBgn0183442	intron_dsim_GLEANR_11660:2_dsim_GLEANR_11660:3	2R	17248068	17248124	-0.872925	0.0382337	57
FBgn0183480	intron_dsim_GLEANR_11697:2_dsim_GLEANR_11697:3	2R	17608593	17608644	1.13559	0.00398633	52
FBgn0196389	intron_dsim_GLEANR_9077:2_dsim_GLEANR_9077:3	2R	17609911	17609973	0.556236	0.0177942	63
FBgn0196344	intron_dsim_GLEANR_9032:5_dsim_GLEANR_9032:6	2R	18058309	18058367	-0.41763	0.0444275	59
FBgn0183522	intron_dsim_GLEANR_11737:2_dsim_GLEANR_11737:3	2R	18137600	18137656	1.044	0.00111707	57
FBgn0183550	intron_dsim_GLEANR_11765:1_dsim_GLEANR_11765:2	2R	18380390	18380905	-0.738235	0.029456	516
FBgn0183572	intron_dsim_GLEANR_11787:1_dsim_GLEANR_11787:2	2R	18510337	18510431	-0.757855	0.0498129	95
FBgn0196256	intron_dsim_GLEANR_8944:5_dsim_GLEANR_8944:6	2R	18907232	18907553	0.666001	0.0479988	322
FBgn0183612	intron_dsim_GLEANR_11826:4_dsim_GLEANR_11826:5	2R	18912314	18912380	-0.798589	0.0175785	67
FBgn0067496	intron_dsim_GLEANR_8919:2_dsim_GLEANR_8919:3	2R	19121919	19121976	2.04712	0.00740346	58
FBgn0185261	intron_dsim_GLEANR_13586:1_dsim_GLEANR_13586:2	3L	167171	167280	0.790996	0.0160255	110
FBgn0185273	intron_dsim_GLEANR_13598:2_dsim_GLEANR_13598:3	3L	298754	298810	0.674165	0.000505713	57
FBgn0185283	intron_dsim_GLEANR_13607:3_dsim_GLEANR_13607:4	3L	490143	490198	1.04187	0.0373926	56
FBgn0185202	intron_dsim_GLEANR_13529:1_dsim_GLEANR_13529:2	3L	822491	822765	0.635762	0.029456	275
FBgn0185321	intron_dsim_GLEANR_13645:3_dsim_GLEANR_13645:4	3L	930312	930420	-0.472729	0.0493644	109
FBgn0185191	intron_dsim_GLEANR_13518:6_dsim_GLEANR_13518:7	3L	941669	943420	-0.611316	0.0291671	1752
FBgn0185191	intron_dsim_GLEANR_13518:4_dsim_GLEANR_13518:5	3L	944194	944539	-0.680123	0.0326524	346
FBgn0185178	intron_dsim_GLEANR_13505:3_dsim_GLEANR_13505:4	3L	1138555	1138611	0.767248	0.0288664	57
FBgn0185344	intron_dsim_GLEANR_13669:2_dsim_GLEANR_13669:3	3L	1211486	1211545	0.622515	0.029456	60
FBgn0185390	intron_dsim_GLEANR_13714:1_dsim_GLEANR_13714:2	3L	1934561	1934622	-0.673933	0.0294822	62
FBgn0185395	intron_dsim_GLEANR_13719:7_dsim_GLEANR_13719:8	3L	2006587	2006995	0.740791	0.047639	409
FBgn0185104	intron_dsim_GLEANR_13431:1_dsim_GLEANR_13431:2	3L	2028294	2028358	1.25736	0.000801675	65
FBgn0185101	intron_dsim_GLEANR_13429:3_dsim_GLEANR_13429:4	3L	2054337	2054928	0.48905	0.0459059	592
FBgn0185408	intron_dsim_GLEANR_13731:1_dsim_GLEANR_13731:2	3L	2200592	2200756	-0.903267	0.029456	165
FBgn0185054	intron_dsim_GLEANR_13381:1_dsim_GLEANR_13381:2	3L	2754265	2754438	-0.589956	0.00682249	174
FBgn0185031	intron_dsim_GLEANR_13355:1_dsim_GLEANR_13355:2	3L	3448962	3449688	-1.05721	0.00643258	727
FBgn0185020	intron_dsim_GLEANR_13344:4_dsim_GLEANR_13344:5	3L	3562185	3562242	0.799259	0.00590211	58
FBgn0185011	intron_dsim_GLEANR_13336:11_dsim_GLEANR_13336:12	3L	3666045	3666103	-0.683684	0.0432455	59
FBgn0184981	intron_dsim_GLEANR_13307:1_dsim_GLEANR_13307:2	3L	3917791	3917849	0.888604	0.0182238	59
FBgn0185562	intron_dsim_GLEANR_13889:6_dsim_GLEANR_13889:7	3L	4403528	4404311	-1.24351	0.0151278	784
FBgn0084321	intron_dsim_GLEANR_13893:7_dsim_GLEANR_13893:8	3L	4456914	4456973	-0.701791	0.0101985	60
FBgn0185580	intron_dsim_GLEANR_13908:3_dsim_GLEANR_13908:4	3L	4869230	4869619	-0.592258	0.0285636	390
FBgn0185580	intron_dsim_GLEANR_13908:4_dsim_GLEANR_13908:5	3L	4869753	4869817	-0.653138	0.0151676	65
FBgn0184900	intron_dsim_GLEANR_13229:2_dsim_GLEANR_13229:3	3L	5269657	5269948	0.60131	0.0453738	292
FBgn0184881	intron_dsim_GLEANR_13210:1_dsim_GLEANR_13210:2	3L	5531739	5531797	1.46719	1.57166e-05	59
FBgn0184853	intron_dsim_GLEANR_13183:9_dsim_GLEANR_13183:10	3L	5734297	5734366	-0.612076	0.0258404	70
FBgn0184827	intron_dsim_GLEANR_13157:4_dsim_GLEANR_13157:5	3L	6417921	6417984	-0.515225	0.00477382	64
FBgn0184819	intron_dsim_GLEANR_13149:1_dsim_GLEANR_13149:2	3L	6452350	6452411	-0.649466	0.00590211	62
FBgn0184750	intron_dsim_GLEANR_13082:4_dsim_GLEANR_13082:5	3L	7441331	7441398	-0.534121	0.0400273	68
FBgn0185740	intron_dsim_GLEANR_14068:2_dsim_GLEANR_14068:3	3L	7497034	7502961	-0.544134	0.0251016	5928
FBgn0185744	intron_dsim_GLEANR_14072:4_dsim_GLEANR_14072:5	3L	7566074	7566140	0.410527	0.0232398	67
FBgn0184720	intron_dsim_GLEANR_13050:2_dsim_GLEANR_13050:3	3L	7811021	7811100	-2.59218	0.000165302	80
FBgn0184684	intron_dsim_GLEANR_13014:1_dsim_GLEANR_13014:2	3L	8236401	8236456	0.850833	0.0363292	56
FBgn0184677	intron_dsim_GLEANR_13007:1_dsim_GLEANR_13007:2	3L	8394850	8394917	-0.734083	0.0356365	68
FBgn0185839	intron_dsim_GLEANR_14168:4_dsim_GLEANR_14168:5	3L	8507133	8510606	-1.67195	0.00590211	3474
FBgn0185840	intron_dsim_GLEANR_14169:6_dsim_GLEANR_14169:7	3L	8514564	8514624	0.784625	0.0417486	61
FBgn0184662	intron_dsim_GLEANR_12992:9_dsim_GLEANR_12992:10	3L	8738227	8738293	0.575699	0.0396654	67
FBgn0184662	intron_dsim_GLEANR_12992:8_dsim_GLEANR_12992:9	3L	8738704	8738772	0.582552	0.003964	69
FBgn0184662	intron_dsim_GLEANR_12992:7_dsim_GLEANR_12992:8	3L	8738912	8738977	0.49981	0.0408798	66
FBgn0184662	intron_dsim_GLEANR_12992:3_dsim_GLEANR_12992:4	3L	8740210	8740267	0.515317	0.0291589	58
FBgn0184662	intron_dsim_GLEANR_12992:2_dsim_GLEANR_12992:3	3L	8740455	8743966	0.781643	0.000284691	3512
FBgn0185858	intron_dsim_GLEANR_14187:1_dsim_GLEANR_14187:2	3L	8747162	8747217	-1.3193	0.00578711	56
FBgn0185860	intron_dsim_GLEANR_14189:2_dsim_GLEANR_14189:3	3L	8758710	8758768	1.10205	0.0234007	59
FBgn0184637	intron_dsim_GLEANR_12968:1_dsim_GLEANR_12968:2	3L	8893233	8893868	0.436126	0.040962	636
FBgn0184627	intron_dsim_GLEANR_12958:5_dsim_GLEANR_12958:6	3L	9055524	9057291	0.530472	0.0396654	1768
FBgn0184627	intron_dsim_GLEANR_12958:4_dsim_GLEANR_12958:5	3L	9057391	9059380	0.977892	0.000134711	1990
FBgn0184627	intron_dsim_GLEANR_12958:3_dsim_GLEANR_12958:4	3L	9059450	9060122	0.752518	0.0444275	673
FBgn0184621	intron_dsim_GLEANR_12952:1_dsim_GLEANR_12952:2	3L	9123989	9124105	-0.794487	0.0283568	117
FBgn0184608	intron_dsim_GLEANR_12939:1_dsim_GLEANR_12939:2	3L	9270572	9270625	-0.906525	0.0218466	54
FBgn0185940	intron_dsim_GLEANR_14267:3_dsim_GLEANR_14267:4	3L	10049736	10049889	0.979263	3.25043e-05	154
FBgn0185940	intron_dsim_GLEANR_14267:4_dsim_GLEANR_14267:5	3L	10049984	10050042	1.20749	0.000243586	59
FBgn0185947	intron_dsim_GLEANR_14273:6_dsim_GLEANR_14273:7	3L	10262873	10262972	-0.487409	0.00668744	100
FBgn0184559	intron_dsim_GLEANR_12892:1_dsim_GLEANR_12892:2	3L	10453305	10453370	-1.36492	0.0142527	66
FBgn0184518	intron_dsim_GLEANR_12850:1_dsim_GLEANR_12850:2	3L	10977391	10977461	-0.959782	9.82057e-06	71
FBgn0186002	intron_dsim_GLEANR_14326:3_dsim_GLEANR_14326:4	3L	10995107	10995197	-0.671158	0.000904905	91
FBgn0184500	intron_dsim_GLEANR_12832:1_dsim_GLEANR_12832:2	3L	11177224	11180173	-1.5826	0.00021853	2950
FBgn0186021	intron_dsim_GLEANR_14344:1_dsim_GLEANR_14344:2	3L	11242355	11242408	1.00778	0.0220774	54
FBgn0184472	intron_dsim_GLEANR_12804:3_dsim_GLEANR_12804:4	3L	11508033	11508091	-0.49763	0.0262348	59
FBgn0012832	intron_dsim_GLEANR_14373:1_dsim_GLEANR_14373:2	3L	11554710	11554759	0.74782	0.00359788	50
FBgn0184466	intron_dsim_GLEANR_12799:2_dsim_GLEANR_12799:3	3L	11568536	11568593	0.558037	0.032448	58
FBgn0186057	intron_dsim_GLEANR_14381:1_dsim_GLEANR_14381:2	3L	11708145	11708205	-1.4775	0.000472891	61
FBgn0186057	intron_dsim_GLEANR_14381:2_dsim_GLEANR_14381:3	3L	11708274	11708341	-1.05709	0.00130959	68
FBgn0186125	intron_dsim_GLEANR_14447:2_dsim_GLEANR_14447:3	3L	12747375	12747547	0.541551	0.0103865	173
FBgn0186133	intron_dsim_GLEANR_14455:1_dsim_GLEANR_14455:2	3L	12838910	12839224	-0.76491	0.049712	315
FBgn0186133	intron_dsim_GLEANR_14455:3_dsim_GLEANR_14455:4	3L	12839992	12840100	-0.771698	0.0203987	109
FBgn0186133	intron_dsim_GLEANR_14455:4_dsim_GLEANR_14455:5	3L	12840194	12840255	-1.08911	0.000110034	62
FBgn0186235	intron_dsim_GLEANR_14558:7_dsim_GLEANR_14558:8	3L	14906852	14906918	-0.626067	0.0412761	67
FBgn0186240	intron_dsim_GLEANR_14563:1_dsim_GLEANR_14563:2	3L	14938024	14939390	-0.938017	0.025784	1367
FBgn0186260	intron_dsim_GLEANR_14581:1_dsim_GLEANR_14581:2	3L	15290028	15290352	0.832912	0.0410966	325
FBgn0186273	intron_dsim_GLEANR_14594:1_dsim_GLEANR_14594:2	3L	15415820	15415872	1.0169	0.0411707	53
FBgn0184241	intron_dsim_GLEANR_12578:1_dsim_GLEANR_12578:2	3L	15457839	15457895	-1.10294	0.048188	57
FBgn0184219	intron_dsim_GLEANR_12557:1_dsim_GLEANR_12557:2	3L	15631945	15632009	0.908064	0.0262348	65
FBgn0262090	intron_dsim_GLEANR_14643:4_dsim_GLEANR_14643:5	3L	15835368	15835444	1.25673	0.017594	77
FBgn0184179	intron_dsim_GLEANR_12515:3_dsim_GLEANR_12515:4	3L	16004871	16005166	-0.392037	0.0413812	296
FBgn0186359	intron_dsim_GLEANR_14682:10_dsim_GLEANR_14682:11	3L	16298181	16299194	0.666694	0.025784	1014
FBgn0186382	intron_dsim_GLEANR_14702:1_dsim_GLEANR_14702:2	3L	16759682	16759950	-0.715845	0.0192409	269
FBgn0186392	intron_dsim_GLEANR_14714:4_dsim_GLEANR_14714:5	3L	16869744	16869894	-0.868114	0.0382337	151
FBgn0186395	intron_dsim_GLEANR_14717:1_dsim_GLEANR_14717:2	3L	16954883	16958537	1.54689	0.00233522	3655
FBgn0186429	intron_dsim_GLEANR_14750:7_dsim_GLEANR_14750:8	3L	17909680	17909748	1.11281	0.0158372	69
FBgn0186430	intron_dsim_GLEANR_14751:5_dsim_GLEANR_14751:6	3L	17911652	17911711	-0.779334	0.0139303	60
FBgn0186438	intron_dsim_GLEANR_14760:1_dsim_GLEANR_14760:2	3L	17989712	17989772	-1.02554	0.00217314	61
FBgn0184063	intron_dsim_GLEANR_12399:1_dsim_GLEANR_12399:2	3L	17993033	17993229	-0.908002	0.0367037	197
FBgn0186449	intron_dsim_GLEANR_14772:2_dsim_GLEANR_14772:3	3L	18168157	18168221	0.795849	0.00889007	65
FBgn0045603	intron_dsim_GLEANR_14873:3_dsim_GLEANR_14873:4	3L	19694419	19694476	0.658164	0.0083786	58
FBgn0186555	intron_dsim_GLEANR_14881:2_dsim_GLEANR_14881:3	3L	19738367	19739398	-0.699059	7.91694e-05	1032
FBgn0183923	intron_dsim_GLEANR_12257:3_dsim_GLEANR_12257:4	3L	19779883	19779936	1.09558	0.00206488	54
FBgn0183913	intron_dsim_GLEANR_12247:1_dsim_GLEANR_12247:2	3L	19874465	19883828	1.00279	0.0165258	9364
FBgn0186586	intron_dsim_GLEANR_14912:4_dsim_GLEANR_14912:5	3L	20182584	20182704	-0.550331	0.0235097	121
FBgn0183867	intron_dsim_GLEANR_12200:3_dsim_GLEANR_12200:4	3L	20619108	20619177	0.835338	0.000520981	70
FBgn0186626	intron_dsim_GLEANR_14950:4_dsim_GLEANR_14950:5	3L	20693015	20693115	-0.585	0.00649729	101
FBgn0186643	intron_dsim_GLEANR_14967:1_dsim_GLEANR_14967:2	3L	20866913	20866982	0.579423	0.0495486	70
FBgn0186654	intron_dsim_GLEANR_14977:1_dsim_GLEANR_14977:2	3L	20973229	20973838	0.528628	0.000275648	610
FBgn0183815	intron_dsim_GLEANR_12147:1_dsim_GLEANR_12147:2	3L	21409703	21410308	-0.742809	0.00590211	606
FBgn0191133	intron_dsim_GLEANR_3432:2_dsim_GLEANR_3432:3	3R	853024	854290	-0.573242	0.0442226	1267
FBgn0191258	intron_dsim_GLEANR_3561:5_dsim_GLEANR_3561:6	3R	1087907	1088018	-1.31141	0.003964	112
FBgn0191127	intron_dsim_GLEANR_3426:1_dsim_GLEANR_3426:2	3R	1089378	1089436	-0.766848	0.0396654	59
FBgn0191108	intron_dsim_GLEANR_3408:2_dsim_GLEANR_3408:3	3R	1323422	1323490	0.789288	0.0192409	69
FBgn0191279	intron_dsim_GLEANR_3582:5_dsim_GLEANR_3582:6	3R	1346682	1346736	-0.613359	0.0199723	55
FBgn0191279	intron_dsim_GLEANR_3582:6_dsim_GLEANR_3582:7	3R	1346867	1346960	-0.832762	0.00248029	94
FBgn0191100	intron_dsim_GLEANR_3399:1_dsim_GLEANR_3399:2	3R	1414628	1414688	-0.641827	0.00590211	61
FBgn0191298	intron_dsim_GLEANR_3600:1_dsim_GLEANR_3600:2	3R	1521801	1522080	1.05984	0.00663472	280
FBgn0191310	intron_dsim_GLEANR_3612:2_dsim_GLEANR_3612:3	3R	1647999	1648059	-0.878267	0.00491854	61
FBgn0191056	intron_dsim_GLEANR_3353:2_dsim_GLEANR_3353:3	3R	1947432	1947570	-0.984972	0.0199723	139
FBgn0191353	intron_dsim_GLEANR_3655:1_dsim_GLEANR_3655:2	3R	2193990	2194231	-0.569126	0.0382337	242
FBgn0191362	intron_dsim_GLEANR_3665:5_dsim_GLEANR_3665:6	3R	2296327	2296550	-0.686423	0.00398038	224
FBgn0191387	intron_dsim_GLEANR_3692:3_dsim_GLEANR_3692:4	3R	2922237	2922484	1.13974	1.57185e-07	248
FBgn0191387	intron_dsim_GLEANR_3692:5_dsim_GLEANR_3692:6	3R	2922884	2922936	0.605982	1.26785e-05	53
FBgn0191007	intron_dsim_GLEANR_3302:3_dsim_GLEANR_3302:4	3R	2938843	2938919	-0.797165	0.00774857	77
FBgn0191435	intron_dsim_GLEANR_3740:1_dsim_GLEANR_3740:2	3R	3674774	3675184	0.80201	0.0250758	411
FBgn0190941	intron_dsim_GLEANR_3236:2_dsim_GLEANR_3236:3	3R	3869242	3869312	-0.96462	0.000880112	71
FBgn0190941	intron_dsim_GLEANR_3236:1_dsim_GLEANR_3236:2	3R	3869441	3869504	-0.99004	0.000931961	64
FBgn0190914	intron_dsim_GLEANR_3209:2_dsim_GLEANR_3209:3	3R	4349806	4349869	4.50879	9.06221e-20	64
FBgn0190914	intron_dsim_GLEANR_3209:1_dsim_GLEANR_3209:2	3R	4350004	4350310	4.47185	4.08385e-22	307
FBgn0190898	intron_dsim_GLEANR_3195:2_dsim_GLEANR_3195:3	3R	4516364	4517025	0.549154	0.00156167	662
FBgn0190898	intron_dsim_GLEANR_3195:1_dsim_GLEANR_3195:2	3R	4517148	4519257	0.638788	4.6455e-05	2110
FBgn0190894	intron_dsim_GLEANR_3191:3_dsim_GLEANR_3191:4	3R	4563197	4563489	0.705147	0.00416284	293
FBgn0191513	intron_dsim_GLEANR_3818:1_dsim_GLEANR_3818:2	3R	4813787	4813845	-0.488113	0.0479988	59
FBgn0190868	intron_dsim_GLEANR_3164:1_dsim_GLEANR_3164:2	3R	4967104	4968406	-1.0412	0.00126577	1303
FBgn0190857	intron_dsim_GLEANR_3153:1_dsim_GLEANR_3153:2	3R	5109759	5109825	-1.08941	3.38358e-07	67
FBgn0191544	intron_dsim_GLEANR_3848:1_dsim_GLEANR_3848:2	3R	5143866	5143926	-1.2608	0.000595719	61
FBgn0191587	intron_dsim_GLEANR_3891:1_dsim_GLEANR_3891:2	3R	6001420	6001769	-0.444883	0.0285259	350
FBgn0190804	intron_dsim_GLEANR_3099:3_dsim_GLEANR_3099:4	3R	6031414	6031468	1.74732	3.23323e-05	55
FBgn0190803	intron_dsim_GLEANR_3098:3_dsim_GLEANR_3098:4	3R	6035084	6035142	1.02536	0.00590211	59
FBgn0190781	intron_dsim_GLEANR_3076:2_dsim_GLEANR_3076:3	3R	6442196	6442327	1.19935	0.029456	132
FBgn0190777	intron_dsim_GLEANR_3071:1_dsim_GLEANR_3071:2	3R	6514634	6514784	1.01809	0.049347	151
FBgn0190776	intron_dsim_GLEANR_3070:2_dsim_GLEANR_3070:3	3R	6516616	6516667	1.02281	0.00885648	52
FBgn0191641	intron_dsim_GLEANR_3947:1_dsim_GLEANR_3947:2	3R	7044747	7044811	1.01193	0.000880112	65
FBgn0191703	intron_dsim_GLEANR_4008:3_dsim_GLEANR_4008:4	3R	8101091	8101146	0.819655	0.026583	56
FBgn0191723	intron_dsim_GLEANR_4028:2_dsim_GLEANR_4028:3	3R	8495635	8495697	-0.400413	0.0413812	63
FBgn0190633	intron_dsim_GLEANR_2928:10_dsim_GLEANR_2928:11	3R	8640441	8640610	0.629179	0.0251016	170
FBgn0190632	intron_dsim_GLEANR_2927:1_dsim_GLEANR_2927:2	3R	8649564	8649977	-1.03977	0.029456	414
FBgn0191737	intron_dsim_GLEANR_4042:1_dsim_GLEANR_4042:2	3R	8650670	8650811	-2.07444	4.6455e-05	142
FBgn0190622	intron_dsim_GLEANR_2916:4_dsim_GLEANR_2916:5	3R	9021873	9021927	1.35233	3.13088e-10	55
FBgn0191763	intron_dsim_GLEANR_4070:1_dsim_GLEANR_4070:2	3R	9194774	9194833	0.755339	0.0265412	60
FBgn0190579	intron_dsim_GLEANR_2875:6_dsim_GLEANR_2875:7	3R	9592991	9593734	-0.566562	0.0262348	744
FBgn0190535	intron_dsim_GLEANR_2831:1_dsim_GLEANR_2831:2	3R	10168405	10168464	-0.772279	0.0401282	60
FBgn0012823	intron_dsim_GLEANR_2829:1_dsim_GLEANR_2829:2	3R	10211236	10211300	-1.1299	0.000202067	65
FBgn0190520	intron_dsim_GLEANR_2816:1_dsim_GLEANR_2816:2	3R	10316799	10316855	-1.30044	0.000209869	57
FBgn0190506	intron_dsim_GLEANR_2802:1_dsim_GLEANR_2802:2	3R	10408939	10408994	0.971938	0.0416332	56
FBgn0191852	intron_dsim_GLEANR_4159:6_dsim_GLEANR_4159:7	3R	10446667	10446738	-0.66321	0.00116422	72
FBgn0191883	intron_dsim_GLEANR_4191:4_dsim_GLEANR_4191:5	3R	11066883	11066955	-1.16013	0.0195088	73
FBgn0190452	intron_dsim_GLEANR_2747:4_dsim_GLEANR_2747:5	3R	11572623	11572756	0.849118	0.000665197	134
FBgn0190429	intron_dsim_GLEANR_2726:2_dsim_GLEANR_2726:3	3R	11943545	11943719	-0.640423	0.0119064	175
FBgn0191955	intron_dsim_GLEANR_4262:2_dsim_GLEANR_4262:3	3R	11951282	11951359	-0.431321	0.018286	78
FBgn0190426	intron_dsim_GLEANR_2723:5_dsim_GLEANR_2723:6	3R	11977807	11977867	-0.413039	0.0356365	61
FBgn0190407	intron_dsim_GLEANR_2705:4_dsim_GLEANR_2705:5	3R	12299516	12299577	1.13265	0.0334778	62
FBgn0190404	intron_dsim_GLEANR_2702:3_dsim_GLEANR_2702:4	3R	12316413	12316476	-0.532364	0.00845276	64
FBgn0190400	intron_dsim_GLEANR_2698:1_dsim_GLEANR_2698:2	3R	12409635	12409683	0.962032	0.0236692	49
FBgn0190391	intron_dsim_GLEANR_2689:1_dsim_GLEANR_2689:2	3R	12544290	12544449	-0.802987	0.0246759	160
FBgn0191992	intron_dsim_GLEANR_4299:4_dsim_GLEANR_4299:5	3R	12547033	12547094	1.13699	0.0158007	62
FBgn0191992	intron_dsim_GLEANR_4299:5_dsim_GLEANR_4299:6	3R	12547221	12547285	0.906098	0.00590211	65
FBgn0190353	intron_dsim_GLEANR_2647:1_dsim_GLEANR_2647:2	3R	13115634	13115709	-1.02852	6.8463e-05	76
FBgn0027803	intron_dsim_GLEANR_2646:3_dsim_GLEANR_2646:4	3R	13117176	13117236	0.388771	0.0396654	61
FBgn0190347	intron_dsim_GLEANR_2640:1_dsim_GLEANR_2640:2	3R	13141104	13141165	-1.21613	8.06417e-05	62
FBgn0192041	intron_dsim_GLEANR_4350:4_dsim_GLEANR_4350:5	3R	13167690	13167742	1.3073	0.00129984	53
FBgn0192064	intron_dsim_GLEANR_4372:1_dsim_GLEANR_4372:2	3R	13372419	13372471	1.06274	0.0413426	53
FBgn0192124	intron_dsim_GLEANR_4431:4_dsim_GLEANR_4431:5	3R	14105085	14106079	-1.03056	0.0416332	995
FBgn0190266	intron_dsim_GLEANR_2557:4_dsim_GLEANR_2557:5	3R	14293261	14293325	0.8427	0.00090412	65
FBgn0190260	intron_dsim_GLEANR_2551:5_dsim_GLEANR_2551:6	3R	14318896	14319146	-0.385278	0.0363292	251
FBgn0192152	intron_dsim_GLEANR_4459:1_dsim_GLEANR_4459:2	3R	14412657	14412715	0.872882	0.00667887	59
FBgn0190247	intron_dsim_GLEANR_2538:1_dsim_GLEANR_2538:2	3R	14582996	14583047	0.989281	0.0290211	52
FBgn0192161	intron_dsim_GLEANR_4468:1_dsim_GLEANR_4468:2	3R	14672498	14673555	-0.463766	0.0490805	1058
FBgn0192178	intron_dsim_GLEANR_4485:1_dsim_GLEANR_4485:2	3R	14827628	14827784	0.684084	0.0114734	157
FBgn0192187	intron_dsim_GLEANR_4494:6_dsim_GLEANR_4494:7	3R	15156747	15156808	0.998723	0.0114266	62
FBgn0190210	intron_dsim_GLEANR_2504:2_dsim_GLEANR_2504:3	3R	15218997	15219058	-0.562977	0.0413812	62
FBgn0190183	intron_dsim_GLEANR_2478:2_dsim_GLEANR_2478:3	3R	15496145	15496200	1.56995	1.51032e-09	56
FBgn0190183	intron_dsim_GLEANR_2478:1_dsim_GLEANR_2478:2	3R	15496309	15496601	1.767	1.46049e-14	293
FBgn0192219	intron_dsim_GLEANR_4525:1_dsim_GLEANR_4525:2	3R	15703338	15703409	-0.770404	0.000650785	72
FBgn0190172	intron_dsim_GLEANR_2468:2_dsim_GLEANR_2468:3	3R	15718732	15718792	-0.649805	0.00699705	61
FBgn0190172	intron_dsim_GLEANR_2468:1_dsim_GLEANR_2468:2	3R	15719017	15719068	0.819242	0.0241403	52
FBgn0190166	intron_dsim_GLEANR_2462:3_dsim_GLEANR_2462:4	3R	15744477	15744537	0.705735	0.0351476	61
FBgn0192246	intron_dsim_GLEANR_4554:1_dsim_GLEANR_4554:2	3R	15932461	15932517	0.545903	0.00109584	57
FBgn0190128	intron_dsim_GLEANR_2426:5_dsim_GLEANR_2426:6	3R	16134658	16134737	0.640042	0.0219655	80
FBgn0190119	intron_dsim_GLEANR_2417:3_dsim_GLEANR_2417:4	3R	16234221	16234709	-0.638059	0.000347799	489
FBgn0190082	intron_dsim_GLEANR_2380:2_dsim_GLEANR_2380:3	3R	16785890	16785957	0.597814	0.000966607	68
FBgn0192315	intron_dsim_GLEANR_4622:2_dsim_GLEANR_4622:3	3R	16801289	16801466	-0.584368	0.0264575	178
FBgn0190061	intron_dsim_GLEANR_2360:1_dsim_GLEANR_2360:2	3R	17094063	17094131	-0.585324	0.0010248	69
FBgn0190034	intron_dsim_GLEANR_2333:3_dsim_GLEANR_2333:4	3R	17334917	17334970	0.573661	0.0137339	54
FBgn0192352	intron_dsim_GLEANR_4658:4_dsim_GLEANR_4658:5	3R	17386894	17386959	0.766439	0.0251016	66
FBgn0190007	intron_dsim_GLEANR_2307:1_dsim_GLEANR_2307:2	3R	17671233	17671488	-0.620351	0.0170857	256
FBgn0192388	intron_dsim_GLEANR_4696:4_dsim_GLEANR_4696:5	3R	17932769	17932832	0.59709	0.0153521	64
FBgn0192388	intron_dsim_GLEANR_4696:5_dsim_GLEANR_4696:6	3R	17932983	17933188	1.27874	3.16378e-08	206
FBgn0192393	intron_dsim_GLEANR_4701:3_dsim_GLEANR_4701:4	3R	17993377	17994320	-0.466887	0.0444275	944
FBgn0192397	intron_dsim_GLEANR_4705:1_dsim_GLEANR_4705:2	3R	18007789	18007841	-0.525585	0.0220774	53
FBgn0189986	intron_dsim_GLEANR_2287:3_dsim_GLEANR_2287:4	3R	18044915	18044967	1.01722	0.0356365	53
FBgn0189972	intron_dsim_GLEANR_2272:6_dsim_GLEANR_2272:7	3R	18179381	18179437	0.514525	0.0119463	57
FBgn0192423	intron_dsim_GLEANR_4731:1_dsim_GLEANR_4731:2	3R	18246940	18246987	1.11524	0.000284691	48
FBgn0189938	intron_dsim_GLEANR_2238:1_dsim_GLEANR_2238:2	3R	18674342	18675246	0.728404	0.00359788	905
FBgn0192451	intron_dsim_GLEANR_4759:2_dsim_GLEANR_4759:3	3R	18727690	18727741	0.776977	0.0103476	52
FBgn0192523	intron_dsim_GLEANR_4829:3_dsim_GLEANR_4829:4	3R	19799266	19799364	1.1949	0.00124802	99
FBgn0189847	intron_dsim_GLEANR_2144:2_dsim_GLEANR_2144:3	3R	19822381	19822437	-0.584696	0.0394038	57
FBgn0189812	intron_dsim_GLEANR_2106:2_dsim_GLEANR_2106:3	3R	20312962	20313075	-1.1343	0.0170857	114
FBgn0189792	intron_dsim_GLEANR_2087:1_dsim_GLEANR_2087:2	3R	20521759	20521823	-3.81441	3.07346e-13	65
FBgn0192594	intron_dsim_GLEANR_4902:4_dsim_GLEANR_4902:5	3R	20541783	20541847	1.1296	0.00056018	65
FBgn0192637	intron_dsim_GLEANR_4944:8_dsim_GLEANR_4944:9	3R	20869233	20869291	1.20383	0.0210423	59
FBgn0189756	intron_dsim_GLEANR_2051:1_dsim_GLEANR_2051:2	3R	20897296	20898040	0.668791	0.00129984	745
FBgn0192651	intron_dsim_GLEANR_4958:2_dsim_GLEANR_4958:3	3R	20924482	20924538	0.567249	0.029456	57
FBgn0189742	intron_dsim_GLEANR_2038:2_dsim_GLEANR_2038:3	3R	20974104	20974159	1.35433	8.15738e-05	56
FBgn0192753	intron_dsim_GLEANR_5075:4_dsim_GLEANR_5075:5	3R	22605662	22605715	-0.73628	0.0335504	54
FBgn0189649	intron_dsim_GLEANR_1936:2_dsim_GLEANR_1936:3	3R	22644366	22644448	0.741242	0.00326741	83
FBgn0189649	intron_dsim_GLEANR_1936:1_dsim_GLEANR_1936:2	3R	22644554	22645593	0.939383	0.00147281	1040
FBgn0192793	intron_dsim_GLEANR_5116:3_dsim_GLEANR_5116:4	3R	23459464	23459885	-0.326624	0.0205606	422
FBgn0189590	intron_dsim_GLEANR_1876:3_dsim_GLEANR_1876:4	3R	23477055	23477114	-1.45797	0.000347799	60
FBgn0189590	intron_dsim_GLEANR_1876:2_dsim_GLEANR_1876:3	3R	23477240	23477300	-0.951355	0.041099	61
FBgn0192810	intron_dsim_GLEANR_5133:24_dsim_GLEANR_5133:25	3R	24119773	24119836	-0.544527	0.0135393	64
FBgn0192810	intron_dsim_GLEANR_5133:25_dsim_GLEANR_5133:26	3R	24120144	24120431	-0.667792	1.88194e-05	288
FBgn0189452	intron_dsim_GLEANR_1819:1_dsim_GLEANR_1819:2	3R	24719395	24719878	-0.754883	0.029456	484
FBgn0189368	intron_dsim_GLEANR_1811:9_dsim_GLEANR_1811:10	3R	24816198	24816255	-0.711263	0.00217314	58
FBgn0188569	intron_dsim_GLEANR_1716:3_dsim_GLEANR_1716:4	3R	25983165	25983223	1.0631	0.000761574	59
FBgn0193012	intron_dsim_GLEANR_5339:1_dsim_GLEANR_5339:2	3R	27050628	27050688	-3.15203	4.81569e-08	61
FBgn0187921	intron_dsim_GLEANR_1652:1_dsim_GLEANR_1652:2	3R	27203675	27203739	0.771615	0.0238368	65
FBgn0187834	intron_dsim_GLEANR_1644:9_dsim_GLEANR_1644:10	3R	27301950	27306969	-0.923611	2.01213e-07	5020
FBgn0188193	intron_dsim_GLEANR_16791:1_dsim_GLEANR_16791:2	X	1443130	1443229	-0.786789	0.00968353	100
FBgn0188282	intron_dsim_GLEANR_16886:1_dsim_GLEANR_16886:2	X	3436041	3436111	-0.430807	0.0425153	71
FBgn0188327	intron_dsim_GLEANR_16928:2_dsim_GLEANR_16928:3	X	4316550	4316628	-0.413481	0.0391224	79
FBgn0187799	intron_dsim_GLEANR_16405:2_dsim_GLEANR_16405:3	X	5427671	5427725	-0.811177	0.0351476	55
FBgn0187778	intron_dsim_GLEANR_16381:1_dsim_GLEANR_16381:2	X	6220078	6220312	-0.974829	0.0326408	235
FBgn0187770	intron_dsim_GLEANR_16371:1_dsim_GLEANR_16371:2	X	6333929	6334116	1.08972	0.0199723	188
FBgn0188521	intron_dsim_GLEANR_17114:1_dsim_GLEANR_17114:2	X	7268364	7268419	1.41409	1.66336e-09	56
FBgn0187713	intron_dsim_GLEANR_16313:5_dsim_GLEANR_16313:6	X	7270782	7270848	-0.837453	0.0218466	67
FBgn0063994	intron_dsim_GLEANR_17118:2_dsim_GLEANR_17118:3	X	7296890	7296960	0.935136	0.0262348	71
FBgn0187693	intron_dsim_GLEANR_16293:4_dsim_GLEANR_16293:5	X	7554871	7554934	-0.850643	0.0356365	64
FBgn0188614	intron_dsim_GLEANR_17205:10_dsim_GLEANR_17205:11	X	8926410	8926481	-0.931223	0.00206488	72
FBgn0188627	intron_dsim_GLEANR_17218:1_dsim_GLEANR_17218:2	X	9081780	9081846	-1.06133	0.00590211	67
FBgn0187568	intron_dsim_GLEANR_16163:3_dsim_GLEANR_16163:4	X	9654439	9654798	0.489129	0.029456	360
FBgn0068599	intron_dsim_GLEANR_17332:1_dsim_GLEANR_17332:2	X	11381804	11441254	-1.5542	0.0265613	59451
FBgn0068670	intron_dsim_GLEANR_16030:2_dsim_GLEANR_16030:3	X	12093740	12094261	0.621417	0.0334025	522
FBgn0187409	intron_dsim_GLEANR_15995:1_dsim_GLEANR_15995:2	X	12572050	12572107	-0.594409	0.0175602	58
FBgn0187386	intron_dsim_GLEANR_15972:9_dsim_GLEANR_15972:10	X	12828931	12829010	-0.466251	0.0394038	80
FBgn0188924	intron_dsim_GLEANR_17499:2_dsim_GLEANR_17499:3	X	13799998	13800059	-0.659953	0.00738871	62
FBgn0188934	intron_dsim_GLEANR_17508:1_dsim_GLEANR_17508:2	X	13853182	13853274	-0.763654	0.0010248	93
FBgn0187240	intron_dsim_GLEANR_15824:1_dsim_GLEANR_15824:2	X	15031108	15031172	-0.648395	0.0302008	65
FBgn0189053	intron_dsim_GLEANR_17625:5_dsim_GLEANR_17625:6	X	15979238	15979378	1.17868	0.00718626	141
FBgn0189070	intron_dsim_GLEANR_17640:2_dsim_GLEANR_17640:3	X	16148649	16148833	-0.424053	0.0317554	185
FBgn0189092	intron_dsim_GLEANR_17668:6_dsim_GLEANR_17668:7	X	16695470	16695558	0.752015	0.0238368	89
FBgn0195730	intron_dsim_GLEANR_8131:7_dsim_GLEANR_8131:8	4	194937	194996	0.778964	0.0151676	60
FBgn0195740	intron_dsim_GLEANR_8152:11_dsim_GLEANR_8152:12	4	233223	233270	1.41137	2.1577e-09	48
FBgn0195756	intron_dsim_GLEANR_8170:1_dsim_GLEANR_8170:2	4	841687	841742	1.02311	0.00033866	56
FBgn0195704	intron_dsim_GLEANR_8101:7_dsim_GLEANR_8101:8	4	921809	922836	0.759727	0.0131647	1028
FBgn0195704	intron_dsim_GLEANR_8101:1_dsim_GLEANR_8101:2	4	924919	924976	0.935702	0.0356365	58

## Sheet: Dsim PanvsMaine 21C
Gene_ID	FlyBase intron name	Chromosome	Location_min	Location_max	Log2 fold change	Adjusted P-value	Intron size
FBgn0066163	intron_dsim_GLEANR_6756:3_dsim_GLEANR_6756:4	2L	315041	315180	-0.625699	0.00327002	140
FBgn0194346	intron_dsim_GLEANR_6692:3_dsim_GLEANR_6692:4	2L	553286	553346	-0.72932	0.00382328	61
FBgn0194423	intron_dsim_GLEANR_6772:1_dsim_GLEANR_6772:2	2L	567674	567732	0.593457	0.0458383	59
FBgn0194337	intron_dsim_GLEANR_6683:3_dsim_GLEANR_6683:4	2L	740378	740965	0.937851	0.0024742	588
FBgn0194337	intron_dsim_GLEANR_6683:1_dsim_GLEANR_6683:2	2L	742184	742292	0.958449	0.0016303	109
FBgn0194332	intron_dsim_GLEANR_6678:5_dsim_GLEANR_6678:6	2L	832419	832837	-0.394739	0.0476846	419
FBgn0194460	intron_dsim_GLEANR_6809:2_dsim_GLEANR_6809:3	2L	1101027	1101115	-0.733168	0.000856222	89
FBgn0194318	intron_dsim_GLEANR_6665:5_dsim_GLEANR_6665:6	2L	1124708	1124777	-0.601745	0.0379695	70
FBgn0194470	intron_dsim_GLEANR_6820:2_dsim_GLEANR_6820:3	2L	1156642	1156977	-0.735307	0.00818155	336
FBgn0194308	intron_dsim_GLEANR_6655:1_dsim_GLEANR_6655:2	2L	1326806	1326854	1.11308	0.0180816	49
FBgn0194305	intron_dsim_GLEANR_6652:4_dsim_GLEANR_6652:5	2L	1332547	1332606	1.02668	0.00906525	60
FBgn0194304	intron_dsim_GLEANR_6651:5_dsim_GLEANR_6651:6	2L	1333784	1333907	0.64703	0.0175571	124
FBgn0194293	intron_dsim_GLEANR_6640:1_dsim_GLEANR_6640:2	2L	1651515	1652502	0.68807	0.0337346	988
FBgn0194291	intron_dsim_GLEANR_6638:9_dsim_GLEANR_6638:10	2L	1718352	1718413	-0.725122	0.0228091	62
FBgn0194509	intron_dsim_GLEANR_6859:15_dsim_GLEANR_6859:16	2L	1909915	1909973	-0.533258	0.0228091	59
FBgn0194509	intron_dsim_GLEANR_6859:16_dsim_GLEANR_6859:17	2L	1910128	1910248	-0.691144	0.00156793	121
FBgn0194513	intron_dsim_GLEANR_6863:1_dsim_GLEANR_6863:2	2L	1953622	1953679	-0.683225	6.22799e-06	58
FBgn0194518	intron_dsim_GLEANR_6868:4_dsim_GLEANR_6868:5	2L	2012494	2012576	-1.10417	0.000692455	83
FBgn0194519	intron_dsim_GLEANR_6869:1_dsim_GLEANR_6869:2	2L	2015540	2015597	-0.893669	0.00596232	58
FBgn0194522	intron_dsim_GLEANR_6872:4_dsim_GLEANR_6872:5	2L	2090061	2090171	-0.361833	0.0301415	111
FBgn0194263	intron_dsim_GLEANR_6611:1_dsim_GLEANR_6611:2	2L	2146215	2146279	0.74405	0.0188812	65
FBgn0194527	intron_dsim_GLEANR_6877:6_dsim_GLEANR_6877:7	2L	2174574	2174633	-1.00037	0.0105025	60
FBgn0194234	intron_dsim_GLEANR_6583:2_dsim_GLEANR_6583:3	2L	2327439	2327529	0.95946	0.00190965	91
FBgn0194214	intron_dsim_GLEANR_6563:1_dsim_GLEANR_6563:2	2L	2538070	2538132	-0.721305	0.00597163	63
FBgn0194563	intron_dsim_GLEANR_6914:8_dsim_GLEANR_6914:9	2L	2701027	2701098	0.706111	0.0397435	72
FBgn0194563	intron_dsim_GLEANR_6914:10_dsim_GLEANR_6914:11	2L	2701526	2701587	-0.765688	3.77037e-05	62
FBgn0194204	intron_dsim_GLEANR_6554:2_dsim_GLEANR_6554:3	2L	2709469	2709526	0.485051	0.0287731	58
FBgn0194204	intron_dsim_GLEANR_6554:1_dsim_GLEANR_6554:2	2L	2710472	2710535	0.684069	0.0061508	64
FBgn0194570	intron_dsim_GLEANR_6921:1_dsim_GLEANR_6921:2	2L	2730914	2730972	-0.776648	0.0151476	59
FBgn0194187	intron_dsim_GLEANR_6537:5_dsim_GLEANR_6537:6	2L	2829822	2829887	-0.916777	0.000264344	66
FBgn0194583	intron_dsim_GLEANR_6934:3_dsim_GLEANR_6934:4	2L	2906032	2906089	-0.826254	0.0192193	58
FBgn0194611	intron_dsim_GLEANR_6961:3_dsim_GLEANR_6961:4	2L	3269381	3269446	-0.697825	0.0183122	66
FBgn0020076	intron_dsim_GLEANR_6496:13_dsim_GLEANR_6496:14	2L	3449295	3452746	-1.17029	0.000667937	3452
FBgn0020076	intron_dsim_GLEANR_6496:12_dsim_GLEANR_6496:13	2L	3452849	3452934	-1.07287	0.00011204	86
FBgn0020076	intron_dsim_GLEANR_6496:8_dsim_GLEANR_6496:9	2L	3454212	3454579	-0.759489	0.0151946	368
FBgn0020076	intron_dsim_GLEANR_6496:7_dsim_GLEANR_6496:8	2L	3454708	3454763	-0.757069	0.0403026	56
FBgn0020076	intron_dsim_GLEANR_6496:2_dsim_GLEANR_6496:3	2L	3456600	3456652	-0.92264	0.0182013	53
FBgn0194626	intron_dsim_GLEANR_6976:4_dsim_GLEANR_6976:5	2L	3470043	3470102	-0.571525	0.00553878	60
FBgn0194649	intron_dsim_GLEANR_7001:1_dsim_GLEANR_7001:2	2L	3818691	3819008	-0.802041	5.45936e-06	318
FBgn0194122	intron_dsim_GLEANR_6469:1_dsim_GLEANR_6469:2	2L	3826297	3827476	-0.627391	0.0449682	1180
FBgn0044195	intron_dsim_GLEANR_7010:3_dsim_GLEANR_7010:4	2L	4079044	4079106	1.25149	0.00534382	63
FBgn0194668	intron_dsim_GLEANR_7020:2_dsim_GLEANR_7020:3	2L	4313726	4313810	0.911957	0.0175829	85
FBgn0194100	intron_dsim_GLEANR_6447:2_dsim_GLEANR_6447:3	2L	4395606	4395668	-0.50404	0.0167382	63
FBgn0194687	intron_dsim_GLEANR_7039:3_dsim_GLEANR_7039:4	2L	4696973	4697043	0.812703	0.0158437	71
FBgn0194083	intron_dsim_GLEANR_6430:7_dsim_GLEANR_6430:8	2L	4712301	4713425	-0.427533	0.0350789	1125
FBgn0194694	intron_dsim_GLEANR_7046:4_dsim_GLEANR_7046:5	2L	4772589	4772656	0.791411	0.000632896	68
FBgn0194078	intron_dsim_GLEANR_6425:6_dsim_GLEANR_6425:7	2L	4780095	4780152	1.16487	6.22799e-06	58
FBgn0194700	intron_dsim_GLEANR_7052:2_dsim_GLEANR_7052:3	2L	4830852	4830903	1.11362	0.0407432	52
FBgn0194066	intron_dsim_GLEANR_6413:5_dsim_GLEANR_6413:6	2L	4850019	4850079	-0.509054	0.0378888	61
FBgn0194060	intron_dsim_GLEANR_6407:1_dsim_GLEANR_6407:2	2L	4894108	4894269	-0.508953	0.00797588	162
FBgn0194708	intron_dsim_GLEANR_7060:4_dsim_GLEANR_7060:5	2L	4911646	4911703	-0.938574	0.00411325	58
FBgn0194719	intron_dsim_GLEANR_7071:1_dsim_GLEANR_7071:2	2L	5082379	5082435	-0.840042	0.0246771	57
FBgn0194034	intron_dsim_GLEANR_6381:5_dsim_GLEANR_6381:6	2L	5530857	5530922	0.670074	0.00717342	66
FBgn0194034	intron_dsim_GLEANR_6381:1_dsim_GLEANR_6381:2	2L	5532208	5532263	0.873398	0.000673093	56
FBgn0194032	intron_dsim_GLEANR_6379:1_dsim_GLEANR_6379:2	2L	5533251	5533316	0.713335	0.0192026	66
FBgn0194753	intron_dsim_GLEANR_7104:1_dsim_GLEANR_7104:2	2L	5676628	5676692	0.755973	0.0337417	65
FBgn0194760	intron_dsim_GLEANR_7112:2_dsim_GLEANR_7112:3	2L	5771560	5772432	0.74797	0.0317472	873
FBgn0194760	intron_dsim_GLEANR_7112:4_dsim_GLEANR_7112:5	2L	5773365	5773447	-0.416657	0.0167382	83
FBgn0194788	intron_dsim_GLEANR_7140:1_dsim_GLEANR_7140:2	2L	6149095	6149468	-0.682834	0.0230875	374
FBgn0194788	intron_dsim_GLEANR_7140:3_dsim_GLEANR_7140:4	2L	6150955	6151014	-0.695924	0.0113578	60
FBgn0194800	intron_dsim_GLEANR_7152:1_dsim_GLEANR_7152:2	2L	6289331	6289387	0.646368	0.0216854	57
FBgn0194801	intron_dsim_GLEANR_7153:3_dsim_GLEANR_7153:4	2L	6316113	6316182	-0.807529	0.0375105	70
FBgn0194804	intron_dsim_GLEANR_7158:1_dsim_GLEANR_7158:2	2L	6405860	6406011	-0.75937	0.00186293	152
FBgn0193954	intron_dsim_GLEANR_6300:6_dsim_GLEANR_6300:7	2L	6479376	6479535	0.688701	0.0419922	160
FBgn0193948	intron_dsim_GLEANR_6295:5_dsim_GLEANR_6295:6	2L	6520779	6520833	-0.69728	0.0016543	55
FBgn0193941	intron_dsim_GLEANR_6288:2_dsim_GLEANR_6288:3	2L	6592916	6592978	0.678064	4.78431e-05	63
FBgn0193931	intron_dsim_GLEANR_6278:14_dsim_GLEANR_6278:15	2L	6728281	6728342	-0.5761	0.0392943	62
FBgn0193910	intron_dsim_GLEANR_6256:3_dsim_GLEANR_6256:4	2L	6985643	6985704	-0.613571	0.00135334	62
FBgn0194846	intron_dsim_GLEANR_7201:2_dsim_GLEANR_7201:3	2L	7179107	7179167	1.04572	0.0400829	61
FBgn0194848	intron_dsim_GLEANR_7203:2_dsim_GLEANR_7203:3	2L	7193288	7193351	0.740973	0.0222104	64
FBgn0194853	intron_dsim_GLEANR_7208:1_dsim_GLEANR_7208:2	2L	7235577	7235635	0.732136	0.0317472	59
FBgn0193885	intron_dsim_GLEANR_6232:11_dsim_GLEANR_6232:12	2L	7444613	7446091	-0.704332	0.00799248	1479
FBgn0193868	intron_dsim_GLEANR_6216:2_dsim_GLEANR_6216:3	2L	7601743	7601872	-0.35995	0.0485406	130
FBgn0193868	intron_dsim_GLEANR_6216:1_dsim_GLEANR_6216:2	2L	7602139	7602205	-0.502861	3.2707e-05	67
FBgn0193840	intron_dsim_GLEANR_6187:1_dsim_GLEANR_6187:2	2L	7944523	7944597	0.622217	0.0282794	75
FBgn0194895	intron_dsim_GLEANR_7252:1_dsim_GLEANR_7252:2	2L	8000137	8000194	-0.722708	0.0151476	58
FBgn0193834	intron_dsim_GLEANR_6181:1_dsim_GLEANR_6181:2	2L	8001412	8001471	1.07687	0.00622443	60
FBgn0193833	intron_dsim_GLEANR_6180:6_dsim_GLEANR_6180:7	2L	8002280	8002344	-0.683435	0.00377035	65
FBgn0193829	intron_dsim_GLEANR_6176:10_dsim_GLEANR_6176:11	2L	8030785	8030969	-0.716602	0.0472128	185
FBgn0193829	intron_dsim_GLEANR_6176:1_dsim_GLEANR_6176:2	2L	8036730	8036795	0.719099	0.0299603	66
FBgn0194908	intron_dsim_GLEANR_7265:2_dsim_GLEANR_7265:3	2L	8152794	8152854	0.627946	0.0336196	61
FBgn0194909	intron_dsim_GLEANR_7266:3_dsim_GLEANR_7266:4	2L	8159253	8159489	0.895539	0.00566327	237
FBgn0193813	intron_dsim_GLEANR_6160:1_dsim_GLEANR_6160:2	2L	8177702	8177769	-0.652096	0.0376354	68
FBgn0194919	intron_dsim_GLEANR_7276:3_dsim_GLEANR_7276:4	2L	8214190	8214447	-0.510543	0.018494	258
FBgn0194931	intron_dsim_GLEANR_7288:2_dsim_GLEANR_7288:3	2L	8296870	8296956	1.10829	0.00521018	87
FBgn0194931	intron_dsim_GLEANR_7288:3_dsim_GLEANR_7288:4	2L	8297468	8297555	0.627877	0.0150191	88
FBgn0193793	intron_dsim_GLEANR_6138:6_dsim_GLEANR_6138:7	2L	8472058	8472121	-0.707526	0.0105496	64
FBgn0194938	intron_dsim_GLEANR_7295:1_dsim_GLEANR_7295:2	2L	8491726	8491815	-0.519495	0.0378354	90
FBgn0194953	intron_dsim_GLEANR_7310:3_dsim_GLEANR_7310:4	2L	8718817	8718903	-0.813877	0.00423573	87
FBgn0193770	intron_dsim_GLEANR_6115:2_dsim_GLEANR_6115:3	2L	8946785	8946884	-0.430797	0.0326704	100
FBgn0194974	intron_dsim_GLEANR_7331:6_dsim_GLEANR_7331:7	2L	9117115	9117176	0.594411	0.0299488	62
FBgn0193757	intron_dsim_GLEANR_6102:1_dsim_GLEANR_6102:2	2L	9353288	9353348	-0.81918	0.0267958	61
FBgn0194997	intron_dsim_GLEANR_7355:20_dsim_GLEANR_7355:21	2L	9429159	9429225	-0.484082	0.0290378	67
FBgn0193747	intron_dsim_GLEANR_6093:5_dsim_GLEANR_6093:6	2L	9526775	9526831	-1.46081	1.99658e-05	57
FBgn0193747	intron_dsim_GLEANR_6093:4_dsim_GLEANR_6093:5	2L	9527004	9527060	-1.72571	8.47123e-09	57
FBgn0193747	intron_dsim_GLEANR_6093:2_dsim_GLEANR_6093:3	2L	9527843	9527914	-1.37015	0.00129975	72
FBgn0195009	intron_dsim_GLEANR_7367:2_dsim_GLEANR_7367:3	2L	9672864	9672979	-0.932166	0.0123	116
FBgn0195009	intron_dsim_GLEANR_7367:4_dsim_GLEANR_7367:5	2L	9673299	9673355	-0.458448	0.0312245	57
FBgn0195028	intron_dsim_GLEANR_7386:4_dsim_GLEANR_7386:5	2L	9825297	9825365	-0.790906	0.0391847	69
FBgn0193706	intron_dsim_GLEANR_6053:1_dsim_GLEANR_6053:2	2L	9985621	9986002	-0.886145	0.0316626	382
FBgn0193696	intron_dsim_GLEANR_6043:1_dsim_GLEANR_6043:2	2L	10037963	10038379	0.64318	0.0101864	417
FBgn0193683	intron_dsim_GLEANR_6030:4_dsim_GLEANR_6030:5	2L	10100945	10101007	0.582322	0.0437991	63
FBgn0195056	intron_dsim_GLEANR_7414:5_dsim_GLEANR_7414:6	2L	10130071	10130132	0.855898	0.00601846	62
FBgn0195060	intron_dsim_GLEANR_7418:2_dsim_GLEANR_7418:3	2L	10147004	10147058	-0.538036	0.0207698	55
FBgn0195070	intron_dsim_GLEANR_7428:14_dsim_GLEANR_7428:15	2L	10192583	10192659	-0.903684	0.00249764	77
FBgn0195080	intron_dsim_GLEANR_7438:1_dsim_GLEANR_7438:2	2L	10230289	10230347	-0.722097	0.0230398	59
FBgn0193652	intron_dsim_GLEANR_6000:1_dsim_GLEANR_6000:2	2L	10380541	10380597	-0.59665	0.0263052	57
FBgn0195097	intron_dsim_GLEANR_7457:1_dsim_GLEANR_7457:2	2L	10477033	10477130	-1.27393	0.000129487	98
FBgn0193637	intron_dsim_GLEANR_5986:2_dsim_GLEANR_5986:3	2L	10544998	10545060	-0.540989	0.0449624	63
FBgn0195113	intron_dsim_GLEANR_7475:3_dsim_GLEANR_7475:4	2L	10668670	10668735	-0.551856	0.0262042	66
FBgn0193587	intron_dsim_GLEANR_5935:3_dsim_GLEANR_5935:4	2L	11148705	11148757	1.53833	8.37674e-05	53
FBgn0195176	intron_dsim_GLEANR_7538:1_dsim_GLEANR_7538:2	2L	11803939	11803996	0.617026	0.0366524	58
FBgn0195185	intron_dsim_GLEANR_7546:1_dsim_GLEANR_7546:2	2L	11891570	11891652	0.680884	0.0317366	83
FBgn0195198	intron_dsim_GLEANR_7560:1_dsim_GLEANR_7560:2	2L	12040622	12073322	-0.616992	0.00534382	32701
FBgn0195198	intron_dsim_GLEANR_7560:2_dsim_GLEANR_7560:3	2L	12073814	12078759	-0.848128	0.000337451	4946
FBgn0195198	intron_dsim_GLEANR_7560:4_dsim_GLEANR_7560:5	2L	12082591	12099014	-0.54581	0.0131547	16424
FBgn0195198	intron_dsim_GLEANR_7560:5_dsim_GLEANR_7560:6	2L	12099197	12099260	-0.326307	0.0156943	64
FBgn0195209	intron_dsim_GLEANR_7571:6_dsim_GLEANR_7571:7	2L	12245513	12245572	-0.768583	0.000150961	60
FBgn0195234	intron_dsim_GLEANR_7596:1_dsim_GLEANR_7596:2	2L	12923789	12923848	-0.715469	0.0151476	60
FBgn0195242	intron_dsim_GLEANR_7604:1_dsim_GLEANR_7604:2	2L	12998662	13002463	-0.595273	0.0151476	3802
FBgn0195249	intron_dsim_GLEANR_7610:2_dsim_GLEANR_7610:3	2L	13027012	13027063	0.530391	0.00159989	52
FBgn0195249	intron_dsim_GLEANR_7610:3_dsim_GLEANR_7610:4	2L	13027211	13027803	0.603638	0.0113334	593
FBgn0195253	intron_dsim_GLEANR_7614:8_dsim_GLEANR_7614:9	2L	13061057	13061155	-0.775548	0.0300515	99
FBgn0193477	intron_dsim_GLEANR_5823:2_dsim_GLEANR_5823:3	2L	13180467	13180535	-0.553451	0.0299488	69
FBgn0193476	intron_dsim_GLEANR_5822:1_dsim_GLEANR_5822:2	2L	13188958	13189072	-0.718489	0.0383647	115
FBgn0193474	intron_dsim_GLEANR_5820:2_dsim_GLEANR_5820:3	2L	13190739	13190802	-0.702131	0.00954455	64
FBgn0195291	intron_dsim_GLEANR_7652:5_dsim_GLEANR_7652:6	2L	13558628	13558696	-0.791551	0.0191108	69
FBgn0083469	intron_dsim_GLEANR_7653:2_dsim_GLEANR_7653:3	2L	13568764	13568830	0.639041	0.0168339	67
FBgn0195292	intron_dsim_GLEANR_7654:1_dsim_GLEANR_7654:2	2L	13571574	13571633	-0.683908	0.0267958	60
FBgn0195294	intron_dsim_GLEANR_7657:1_dsim_GLEANR_7657:2	2L	13583146	13583634	0.767416	0.0252251	489
FBgn0195294	intron_dsim_GLEANR_7657:2_dsim_GLEANR_7657:3	2L	13584003	13584065	1.15443	0.00414928	63
FBgn0193442	intron_dsim_GLEANR_5791:1_dsim_GLEANR_5791:2	2L	13688065	13688827	-1.19119	0.000100436	763
FBgn0193440	intron_dsim_GLEANR_5789:2_dsim_GLEANR_5789:3	2L	13721115	13721196	0.644427	0.0186019	82
FBgn0193440	intron_dsim_GLEANR_5789:1_dsim_GLEANR_5789:2	2L	13721734	13722104	0.733119	0.0178169	371
FBgn0195312	intron_dsim_GLEANR_7677:4_dsim_GLEANR_7677:5	2L	13775135	13775192	-0.721385	0.0314461	58
FBgn0012824	intron_dsim_GLEANR_7697:1_dsim_GLEANR_7697:2	2L	14373279	14373345	0.487894	0.0151946	67
FBgn0193389	intron_dsim_GLEANR_5739:2_dsim_GLEANR_5739:3	2L	14785079	14785137	-0.539266	0.0257991	59
FBgn0193385	intron_dsim_GLEANR_5735:2_dsim_GLEANR_5735:3	2L	14813537	14813711	-0.40067	0.0345945	175
FBgn0193381	intron_dsim_GLEANR_5731:10_dsim_GLEANR_5731:11	2L	15014164	15014223	-0.645238	0.0456258	60
FBgn0193380	intron_dsim_GLEANR_5730:7_dsim_GLEANR_5730:8	2L	15023585	15023646	-0.444399	0.00248101	62
FBgn0195395	intron_dsim_GLEANR_7764:4_dsim_GLEANR_7764:5	2L	15761925	15761988	-0.695199	0.0324419	64
FBgn0195395	intron_dsim_GLEANR_7764:7_dsim_GLEANR_7764:8	2L	15763325	15763418	-0.487789	0.0495198	94
FBgn0193338	intron_dsim_GLEANR_5687:3_dsim_GLEANR_5687:4	2L	16014002	16014190	0.746922	0.047342	189
FBgn0193333	intron_dsim_GLEANR_5681:2_dsim_GLEANR_5681:3	2L	16047128	16047229	-0.789115	0.015112	102
FBgn0044199	intron_dsim_GLEANR_7785:1_dsim_GLEANR_7785:2	2L	16163563	16163630	0.738796	0.00173661	68
FBgn0193320	intron_dsim_GLEANR_5668:4_dsim_GLEANR_5668:5	2L	16422894	16422957	0.725445	0.00287005	64
FBgn0195436	intron_dsim_GLEANR_7806:4_dsim_GLEANR_7806:5	2L	16471783	16471855	0.768057	0.00359073	73
FBgn0193313	intron_dsim_GLEANR_5661:2_dsim_GLEANR_5661:3	2L	16484355	16484426	0.589944	0.0151477	72
FBgn0193304	intron_dsim_GLEANR_5652:3_dsim_GLEANR_5652:4	2L	16584918	16584980	0.804278	0.0314461	63
FBgn0195463	intron_dsim_GLEANR_7832:6_dsim_GLEANR_7832:7	2L	17103537	17103590	0.490533	0.0461713	54
FBgn0067500	intron_dsim_GLEANR_5634:6_dsim_GLEANR_5634:7	2L	17140164	17140301	-0.990355	0.00177836	138
FBgn0195466	intron_dsim_GLEANR_7835:1_dsim_GLEANR_7835:2	2L	17155736	17155794	-0.628272	0.00333106	59
FBgn0195489	intron_dsim_GLEANR_7857:1_dsim_GLEANR_7857:2	2L	17831446	17831515	0.963245	0.00653489	70
FBgn0193242	intron_dsim_GLEANR_5586:2_dsim_GLEANR_5586:3	2L	18363203	18363253	-0.728972	0.0463347	51
FBgn0193214	intron_dsim_GLEANR_5558:2_dsim_GLEANR_5558:3	2L	18665603	18665656	0.590656	0.0300515	54
FBgn0195533	intron_dsim_GLEANR_7901:1_dsim_GLEANR_7901:2	2L	18750090	18750147	-0.952325	0.00280642	58
FBgn0193186	intron_dsim_GLEANR_5530:4_dsim_GLEANR_5530:5	2L	19069414	19069543	0.467719	0.0193441	130
FBgn0193184	intron_dsim_GLEANR_5528:7_dsim_GLEANR_5528:8	2L	19085137	19085403	-0.521895	0.0168339	267
FBgn0264798	intron_dsim_GLEANR_7944:3_dsim_GLEANR_7944:4	2L	19239799	19239860	0.598013	0.0382623	62
FBgn0195586	intron_dsim_GLEANR_7959:4_dsim_GLEANR_7959:5	2L	19625432	19625494	0.457076	0.00841492	63
FBgn0195600	intron_dsim_GLEANR_7974:1_dsim_GLEANR_7974:2	2L	19885687	19895126	-0.807031	0.00138271	9440
FBgn0195607	intron_dsim_GLEANR_7981:2_dsim_GLEANR_7981:3	2L	20022588	20022647	-0.645871	0.0178306	60
FBgn0195613	intron_dsim_GLEANR_7987:1_dsim_GLEANR_7987:2	2L	20199130	20199196	0.979143	0.00592703	67
FBgn0193102	intron_dsim_GLEANR_5444:4_dsim_GLEANR_5444:5	2L	20421571	20421644	-0.608652	0.0485406	74
FBgn0193102	intron_dsim_GLEANR_5444:3_dsim_GLEANR_5444:4	2L	20421957	20422023	-0.870886	1.14978e-07	67
FBgn0195654	intron_dsim_GLEANR_8031:3_dsim_GLEANR_8031:4	2L	20755365	20755425	-0.559429	0.0495198	61
FBgn0195658	intron_dsim_GLEANR_8035:7_dsim_GLEANR_8035:8	2L	20814596	20815000	-0.693913	0.0463347	405
FBgn0193065	intron_dsim_GLEANR_5405:1_dsim_GLEANR_5405:2	2L	20885842	20885898	-0.449335	0.0403026	57
FBgn0195671	intron_dsim_GLEANR_8053:3_dsim_GLEANR_8053:4	2L	21059701	21059756	0.686423	0.0180964	56
FBgn0195676	intron_dsim_GLEANR_8062:2_dsim_GLEANR_8062:3	2L	21212582	21212639	-0.548972	0.0316626	58
FBgn0193055	intron_dsim_GLEANR_5387:1_dsim_GLEANR_5387:2	2L	21237397	21237910	0.819602	0.00106538	514
FBgn0182147	intron_dsim_GLEANR_10353:1_dsim_GLEANR_10353:2	2R	340845	342622	0.894385	0.0222547	1778
FBgn0182148	intron_dsim_GLEANR_10357:2_dsim_GLEANR_10357:3	2R	390012	390563	0.930078	0.0407432	552
FBgn0182127	intron_dsim_GLEANR_10321:3_dsim_GLEANR_10321:4	2R	423570	423625	0.623195	0.0156943	56
FBgn0182127	intron_dsim_GLEANR_10321:2_dsim_GLEANR_10321:3	2R	423753	423825	0.835615	0.00783283	73
FBgn0182121	intron_dsim_GLEANR_10315:7_dsim_GLEANR_10315:8	2R	567196	567258	-0.636756	0.0499334	63
FBgn0182169	intron_dsim_GLEANR_10380:2_dsim_GLEANR_10380:3	2R	921128	921179	0.883967	0.00534382	52
FBgn0182170	intron_dsim_GLEANR_10381:1_dsim_GLEANR_10381:2	2R	956916	957018	-0.768436	0.000216307	103
FBgn0182104	intron_dsim_GLEANR_10299:2_dsim_GLEANR_10299:3	2R	964548	964598	1.40765	1.64718e-05	51
FBgn0182175	intron_dsim_GLEANR_10387:8_dsim_GLEANR_10387:9	2R	1038672	1039548	-0.681121	0.0274319	877
FBgn0182091	intron_dsim_GLEANR_10280:5_dsim_GLEANR_10280:6	2R	1353689	1353806	-0.702977	0.011839	118
FBgn0182082	intron_dsim_GLEANR_10271:4_dsim_GLEANR_10271:5	2R	1408485	1408548	0.77856	0.0382623	64
FBgn0182192	intron_dsim_GLEANR_10407:2_dsim_GLEANR_10407:3	2R	1444752	1444807	-0.594194	0.0375587	56
FBgn0182192	intron_dsim_GLEANR_10407:3_dsim_GLEANR_10407:4	2R	1445316	1445365	-1.16641	1.14978e-07	50
FBgn0182194	intron_dsim_GLEANR_10409:4_dsim_GLEANR_10409:5	2R	1456126	1456412	-0.408698	0.0354982	287
FBgn0182076	intron_dsim_GLEANR_10266:3_dsim_GLEANR_10266:4	2R	1458221	1458280	-0.936604	0.0476846	60
FBgn0182063	intron_dsim_GLEANR_10252:11_dsim_GLEANR_10252:12	2R	1632658	1632893	-0.742173	0.0204058	236
FBgn0182212	intron_dsim_GLEANR_10427:1_dsim_GLEANR_10427:2	2R	1689118	1691170	1.00112	0.000194307	2053
FBgn0182212	intron_dsim_GLEANR_10427:4_dsim_GLEANR_10427:5	2R	1691845	1692021	0.401656	0.0458158	177
FBgn0182053	intron_dsim_GLEANR_10242:4_dsim_GLEANR_10242:5	2R	1698239	1698295	-0.989591	0.00494639	57
FBgn0182215	intron_dsim_GLEANR_10430:1_dsim_GLEANR_10430:2	2R	1701151	1705112	1.42526	1.25895e-05	3962
FBgn0182219	intron_dsim_GLEANR_10434:3_dsim_GLEANR_10434:4	2R	1724279	1724335	0.750026	0.0202426	57
FBgn0182044	intron_dsim_GLEANR_10233:3_dsim_GLEANR_10233:4	2R	1837506	1837571	0.526274	0.0482302	66
FBgn0182239	intron_dsim_GLEANR_10454:2_dsim_GLEANR_10454:3	2R	1921956	1922114	-0.86445	0.000453363	159
FBgn0182036	intron_dsim_GLEANR_10224:4_dsim_GLEANR_10224:5	2R	2001467	2001527	-0.854567	0.00105911	61
FBgn0182027	intron_dsim_GLEANR_10214:5_dsim_GLEANR_10214:6	2R	2079414	2079481	0.780203	0.0102927	68
FBgn0182259	intron_dsim_GLEANR_10473:1_dsim_GLEANR_10473:2	2R	2144687	2146949	-0.421626	0.0426692	2263
FBgn0182267	intron_dsim_GLEANR_10481:12_dsim_GLEANR_10481:13	2R	2264188	2264247	0.805491	0.00984408	60
FBgn0182271	intron_dsim_GLEANR_10485:1_dsim_GLEANR_10485:2	2R	2276837	2276938	-0.772401	0.0183122	102
FBgn0182271	intron_dsim_GLEANR_10485:3_dsim_GLEANR_10485:4	2R	2277416	2277480	-0.980958	0.00763162	65
FBgn0182005	intron_dsim_GLEANR_10192:1_dsim_GLEANR_10192:2	2R	2304585	2304646	-0.844696	0.0233441	62
FBgn0182003	intron_dsim_GLEANR_10190:4_dsim_GLEANR_10190:5	2R	2308807	2308966	-0.60485	0.0373209	160
FBgn0181992	intron_dsim_GLEANR_10179:1_dsim_GLEANR_10179:2	2R	2430478	2430540	-0.806627	0.00490258	63
FBgn0182316	intron_dsim_GLEANR_10530:1_dsim_GLEANR_10530:2	2R	2711103	2711357	-0.708587	0.0221047	255
FBgn0182334	intron_dsim_GLEANR_10547:1_dsim_GLEANR_10547:2	2R	2968437	2968490	-0.843471	0.0193441	54
FBgn0182338	intron_dsim_GLEANR_10550:1_dsim_GLEANR_10550:2	2R	2979059	2979115	0.724401	0.0246524	57
FBgn0182338	intron_dsim_GLEANR_10550:4_dsim_GLEANR_10550:5	2R	2980600	2980653	1.04931	0.00017459	54
FBgn0181941	intron_dsim_GLEANR_10127:2_dsim_GLEANR_10127:3	2R	2988586	2988662	-0.760338	0.045796	77
FBgn0182341	intron_dsim_GLEANR_10553:2_dsim_GLEANR_10553:3	2R	3011272	3011331	-1.16551	0.0222547	60
FBgn0181930	intron_dsim_GLEANR_10117:1_dsim_GLEANR_10117:2	2R	3123674	3123877	-1.87999	1.24863e-05	204
FBgn0182374	intron_dsim_GLEANR_10588:17_dsim_GLEANR_10588:18	2R	3444787	3444843	0.575897	0.0497631	57
FBgn0181887	intron_dsim_GLEANR_10077:3_dsim_GLEANR_10077:4	2R	3597586	3597639	0.862349	0.0224985	54
FBgn0181887	intron_dsim_GLEANR_10077:1_dsim_GLEANR_10077:2	2R	3599181	3599467	1.23349	0.00630358	287
FBgn0182393	intron_dsim_GLEANR_10607:1_dsim_GLEANR_10607:2	2R	3640231	3640281	0.502121	0.0455186	51
FBgn0182399	intron_dsim_GLEANR_10613:2_dsim_GLEANR_10613:3	2R	3675879	3675942	-0.585984	0.0364488	64
FBgn0181875	intron_dsim_GLEANR_10065:3_dsim_GLEANR_10065:4	2R	3699123	3699183	0.68774	0.00853692	61
FBgn0182407	intron_dsim_GLEANR_10620:7_dsim_GLEANR_10620:8	2R	3707483	3707541	-1.08114	0.0156943	59
FBgn0182414	intron_dsim_GLEANR_10627:2_dsim_GLEANR_10627:3	2R	3793869	3793931	-0.778268	0.0491904	63
FBgn0182422	intron_dsim_GLEANR_10635:4_dsim_GLEANR_10635:5	2R	3968191	3968255	-0.591025	0.0158437	65
FBgn0182425	intron_dsim_GLEANR_10638:17_dsim_GLEANR_10638:18	2R	4017876	4018110	-0.866882	0.00835932	235
FBgn0182431	intron_dsim_GLEANR_10643:6_dsim_GLEANR_10643:7	2R	4102256	4102312	-0.508648	0.03592	57
FBgn0182437	intron_dsim_GLEANR_10649:2_dsim_GLEANR_10649:3	2R	4126029	4126086	-0.558421	0.0495705	58
FBgn0181820	intron_dsim_GLEANR_10012:2_dsim_GLEANR_10012:3	2R	4376788	4376855	-0.461155	0.0287446	68
FBgn0181820	intron_dsim_GLEANR_10012:1_dsim_GLEANR_10012:2	2R	4377886	4377948	-0.834947	0.000829199	63
FBgn0181819	intron_dsim_GLEANR_10011:4_dsim_GLEANR_10011:5	2R	4378608	4379087	0.699436	0.0174244	480
FBgn0182469	intron_dsim_GLEANR_10682:2_dsim_GLEANR_10682:3	2R	4487262	4487445	-0.49896	0.00111864	184
FBgn0182469	intron_dsim_GLEANR_10682:5_dsim_GLEANR_10682:6	2R	4488114	4488175	-0.43723	0.0407432	62
FBgn0197288	intron_dsim_GLEANR_9999:6_dsim_GLEANR_9999:7	2R	4547320	4548155	-0.591388	0.023216	836
FBgn0197280	intron_dsim_GLEANR_9990:1_dsim_GLEANR_9990:2	2R	4638292	4638342	-1.18494	0.0233441	51
FBgn0182495	intron_dsim_GLEANR_10708:5_dsim_GLEANR_10708:6	2R	4816749	4816925	0.687337	0.0065091	177
FBgn0182506	intron_dsim_GLEANR_10718:3_dsim_GLEANR_10718:4	2R	4964518	4976817	0.83519	0.0246771	12300
FBgn0197258	intron_dsim_GLEANR_9967:10_dsim_GLEANR_9967:11	2R	4966384	4966448	-0.804977	0.00209235	65
FBgn0182506	intron_dsim_GLEANR_10718:6_dsim_GLEANR_10718:7	2R	4977370	4977434	0.741472	0.0360375	65
FBgn0182517	intron_dsim_GLEANR_10729:2_dsim_GLEANR_10729:3	2R	5230761	5230904	0.48257	0.0180249	144
FBgn0197226	intron_dsim_GLEANR_9936:6_dsim_GLEANR_9936:7	2R	5324259	5324326	-0.689911	0.0020013	68
FBgn0067505	intron_dsim_GLEANR_9915:1_dsim_GLEANR_9915:2	2R	5715470	5715599	0.931644	0.0161259	130
FBgn0197171	intron_dsim_GLEANR_9880:8_dsim_GLEANR_9880:9	2R	6053866	6053923	-0.496286	0.0458158	58
FBgn0197155	intron_dsim_GLEANR_9863:6_dsim_GLEANR_9863:7	2R	6323192	6323253	-0.628852	0.000194516	62
FBgn0197155	intron_dsim_GLEANR_9863:4_dsim_GLEANR_9863:5	2R	6323649	6326930	-0.504884	0.00287005	3282
FBgn0197155	intron_dsim_GLEANR_9863:2_dsim_GLEANR_9863:3	2R	6327414	6327699	-0.873539	6.22799e-06	286
FBgn0197153	intron_dsim_GLEANR_9861:1_dsim_GLEANR_9861:2	2R	6393489	6393540	-0.559034	0.032448	52
FBgn0197149	intron_dsim_GLEANR_9857:5_dsim_GLEANR_9857:6	2R	6410955	6411018	-0.924956	0.00330465	64
FBgn0182596	intron_dsim_GLEANR_10807:1_dsim_GLEANR_10807:2	2R	6459103	6460079	0.800428	0.0274203	977
FBgn0182596	intron_dsim_GLEANR_10807:2_dsim_GLEANR_10807:3	2R	6460303	6460367	0.680027	0.00545035	65
FBgn0182610	intron_dsim_GLEANR_10821:1_dsim_GLEANR_10821:2	2R	6608402	6608463	-1.18244	0.00209235	62
FBgn0182610	intron_dsim_GLEANR_10821:2_dsim_GLEANR_10821:3	2R	6609059	6609114	-0.716354	1.05669e-05	56
FBgn0182610	intron_dsim_GLEANR_10821:3_dsim_GLEANR_10821:4	2R	6609265	6609324	-0.478025	0.00654795	60
FBgn0182612	intron_dsim_GLEANR_10823:1_dsim_GLEANR_10823:2	2R	6614282	6619040	-1.00365	2.52171e-10	4759
FBgn0182612	intron_dsim_GLEANR_10823:2_dsim_GLEANR_10823:3	2R	6619216	6623263	-0.463035	0.024563	4048
FBgn0182640	intron_dsim_GLEANR_10850:1_dsim_GLEANR_10850:2	2R	6761130	6762303	-0.671678	0.00653489	1174
FBgn0182640	intron_dsim_GLEANR_10850:2_dsim_GLEANR_10850:3	2R	6762432	6763073	-0.683025	0.00653489	642
FBgn0182662	intron_dsim_GLEANR_10872:6_dsim_GLEANR_10872:7	2R	6930869	6930928	-0.962879	0.0116808	60
FBgn0197109	intron_dsim_GLEANR_9818:4_dsim_GLEANR_9818:5	2R	6953440	6953500	-0.692062	0.0274203	61
FBgn0182667	intron_dsim_GLEANR_10877:6_dsim_GLEANR_10877:7	2R	6990024	6990084	0.747099	0.0151476	61
FBgn0197095	intron_dsim_GLEANR_9804:3_dsim_GLEANR_9804:4	2R	7121536	7121608	-0.59978	0.00378102	73
FBgn0197095	intron_dsim_GLEANR_9804:1_dsim_GLEANR_9804:2	2R	7122306	7122585	-0.509779	0.035361	280
FBgn0182684	intron_dsim_GLEANR_10894:2_dsim_GLEANR_10894:3	2R	7158795	7158976	-0.688568	0.0248854	182
FBgn0182693	intron_dsim_GLEANR_10902:2_dsim_GLEANR_10902:3	2R	7267929	7268050	-0.504086	0.00677372	122
FBgn0197064	intron_dsim_GLEANR_9772:1_dsim_GLEANR_9772:2	2R	7552668	7552733	0.986038	0.00215894	66
FBgn0182719	intron_dsim_GLEANR_10928:1_dsim_GLEANR_10928:2	2R	7591753	7591891	0.55144	0.0106147	139
FBgn0182721	intron_dsim_GLEANR_10931:2_dsim_GLEANR_10931:3	2R	7608757	7608868	-0.701258	0.0268454	112
FBgn0182721	intron_dsim_GLEANR_10931:3_dsim_GLEANR_10931:4	2R	7608961	7609371	-0.478172	0.0350789	411
FBgn0197050	intron_dsim_GLEANR_9758:1_dsim_GLEANR_9758:2	2R	7644135	7644197	-0.609659	0.0275209	63
FBgn0182726	intron_dsim_GLEANR_10937:1_dsim_GLEANR_10937:2	2R	7753024	7753085	-0.782064	0.0314461	62
FBgn0197042	intron_dsim_GLEANR_9750:7_dsim_GLEANR_9750:8	2R	7778957	7779016	-0.51175	0.00534382	60
FBgn0197042	intron_dsim_GLEANR_9750:6_dsim_GLEANR_9750:7	2R	7779081	7779151	-0.724259	0.00305083	71
FBgn0182731	intron_dsim_GLEANR_10943:1_dsim_GLEANR_10943:2	2R	7845110	7845174	-0.468717	0.0498811	65
FBgn0197030	intron_dsim_GLEANR_9737:2_dsim_GLEANR_9737:3	2R	7913874	7913940	-0.8558	0.0266515	67
FBgn0182746	intron_dsim_GLEANR_10958:1_dsim_GLEANR_10958:2	2R	8156378	8158131	-0.39749	0.0169832	1754
FBgn0197016	intron_dsim_GLEANR_9723:8_dsim_GLEANR_9723:9	2R	8199301	8199365	0.473847	0.0482088	65
FBgn0197016	intron_dsim_GLEANR_9723:5_dsim_GLEANR_9723:6	2R	8200015	8200157	1.04282	1.96076e-05	143
FBgn0196999	intron_dsim_GLEANR_9704:11_dsim_GLEANR_9704:12	2R	8530466	8530524	0.691764	0.0425256	59
FBgn0196988	intron_dsim_GLEANR_9692:16_dsim_GLEANR_9692:17	2R	8654745	8654806	-1.14727	0.0150191	62
FBgn0182780	intron_dsim_GLEANR_10994:7_dsim_GLEANR_10994:8	2R	8811569	8812078	-0.886869	0.000962906	510
FBgn0182787	intron_dsim_GLEANR_11000:2_dsim_GLEANR_11000:3	2R	8829502	8829562	0.583964	0.00782103	61
FBgn0182788	intron_dsim_GLEANR_11001:5_dsim_GLEANR_11001:6	2R	8835026	8835087	-0.675451	0.0482183	62
FBgn0182791	intron_dsim_GLEANR_11004:2_dsim_GLEANR_11004:3	2R	8879464	8879580	-0.606223	0.00790178	117
FBgn0196977	intron_dsim_GLEANR_9681:1_dsim_GLEANR_9681:2	2R	8905734	8905851	0.85583	0.0476882	118
FBgn0182818	intron_dsim_GLEANR_11033:9_dsim_GLEANR_11033:10	2R	9152139	9152196	-0.581297	0.0162934	58
FBgn0196942	intron_dsim_GLEANR_9647:1_dsim_GLEANR_9647:2	2R	9420704	9424572	-0.617489	0.0423908	3869
FBgn0196937	intron_dsim_GLEANR_9642:6_dsim_GLEANR_9642:7	2R	9507276	9507328	-0.69602	0.0461713	53
FBgn0182841	intron_dsim_GLEANR_11059:1_dsim_GLEANR_11059:2	2R	9532959	9533021	0.650587	0.0356789	63
FBgn0196932	intron_dsim_GLEANR_9637:1_dsim_GLEANR_9637:2	2R	9536268	9536320	1.39596	0.00176591	53
FBgn0182844	intron_dsim_GLEANR_11061:1_dsim_GLEANR_11061:2	2R	9539552	9539677	-0.429049	0.0498904	126
FBgn0196930	intron_dsim_GLEANR_9635:1_dsim_GLEANR_9635:2	2R	9544084	9544144	-0.999157	0.0247205	61
FBgn0196893	intron_dsim_GLEANR_9597:9_dsim_GLEANR_9597:10	2R	10278550	10278747	-0.640398	0.0131111	198
FBgn0196883	intron_dsim_GLEANR_9588:15_dsim_GLEANR_9588:16	2R	10386948	10387003	0.586138	0.0125027	56
FBgn0196883	intron_dsim_GLEANR_9588:1_dsim_GLEANR_9588:2	2R	10408016	10428220	0.396431	0.0463347	20205
FBgn0196874	intron_dsim_GLEANR_9579:5_dsim_GLEANR_9579:6	2R	10550167	10550235	-0.617481	0.00818155	69
FBgn0196869	intron_dsim_GLEANR_9574:8_dsim_GLEANR_9574:9	2R	10575252	10575312	0.735275	0.0234162	61
FBgn0196868	intron_dsim_GLEANR_9573:8_dsim_GLEANR_9573:9	2R	10581485	10583235	0.696409	0.0471762	1751
FBgn0182914	intron_dsim_GLEANR_11132:8_dsim_GLEANR_11132:9	2R	10740593	10740650	0.570018	0.0300515	58
FBgn0182914	intron_dsim_GLEANR_11132:10_dsim_GLEANR_11132:11	2R	10741742	10741797	0.536236	0.00819114	56
FBgn0196845	intron_dsim_GLEANR_9551:4_dsim_GLEANR_9551:5	2R	10831531	10831598	-0.903397	0.00596232	68
FBgn0196831	intron_dsim_GLEANR_9537:4_dsim_GLEANR_9537:5	2R	10945830	10945892	0.784839	1.24168e-08	63
FBgn0196831	intron_dsim_GLEANR_9537:3_dsim_GLEANR_9537:4	2R	10945992	10946049	0.756521	2.13502e-07	58
FBgn0196818	intron_dsim_GLEANR_9524:2_dsim_GLEANR_9524:3	2R	11192476	11192542	-0.703232	0.000199998	67
FBgn0196818	intron_dsim_GLEANR_9524:1_dsim_GLEANR_9524:2	2R	11192632	11192812	0.940115	0.0102563	181
FBgn0182965	intron_dsim_GLEANR_11186:1_dsim_GLEANR_11186:2	2R	11314090	11314534	1.00811	0.012532	445
FBgn0182984	intron_dsim_GLEANR_11203:10_dsim_GLEANR_11203:11	2R	11524976	11525036	-0.764529	0.0453858	61
FBgn0183019	intron_dsim_GLEANR_11241:1_dsim_GLEANR_11241:2	2R	12085365	12085428	0.656068	0.0266046	64
FBgn0183019	intron_dsim_GLEANR_11241:2_dsim_GLEANR_11241:3	2R	12085508	12085575	0.584648	0.0209286	68
FBgn0183023	intron_dsim_GLEANR_11245:2_dsim_GLEANR_11245:3	2R	12108765	12108827	0.813313	0.0273425	63
FBgn0045613	intron_dsim_GLEANR_11251:2_dsim_GLEANR_11251:3	2R	12137179	12137243	-0.697869	0.0101226	65
FBgn0183050	intron_dsim_GLEANR_11272:1_dsim_GLEANR_11272:2	2R	12294544	12294601	-0.83183	0.000728771	58
FBgn0196737	intron_dsim_GLEANR_9434:3_dsim_GLEANR_9434:4	2R	12392381	12392438	-0.625397	0.00630358	58
FBgn0196732	intron_dsim_GLEANR_9429:2_dsim_GLEANR_9429:3	2R	12408502	12408563	-0.951479	0.00866614	62
FBgn0196728	intron_dsim_GLEANR_9425:3_dsim_GLEANR_9425:4	2R	12496384	12497098	-0.57927	0.00176591	715
FBgn0196725	intron_dsim_GLEANR_9422:5_dsim_GLEANR_9422:6	2R	12517005	12517063	0.708751	0.0432314	59
FBgn0196715	intron_dsim_GLEANR_9412:1_dsim_GLEANR_9412:2	2R	12679200	12679458	-0.894297	0.0274203	259
FBgn0183085	intron_dsim_GLEANR_11305:3_dsim_GLEANR_11305:4	2R	12719213	12719272	-0.788889	0.0437991	60
FBgn0183092	intron_dsim_GLEANR_11312:1_dsim_GLEANR_11312:2	2R	12772654	12772719	-0.716643	0.0432314	66
FBgn0183105	intron_dsim_GLEANR_11325:1_dsim_GLEANR_11325:2	2R	12917843	12917904	1.08211	0.010409	62
FBgn0183112	intron_dsim_GLEANR_11332:1_dsim_GLEANR_11332:2	2R	12992560	12992626	1.00056	0.00278425	67
FBgn0183113	intron_dsim_GLEANR_11333:1_dsim_GLEANR_11333:2	2R	12993168	12993227	-1.11293	8.19268e-09	60
FBgn0183115	intron_dsim_GLEANR_11335:1_dsim_GLEANR_11335:2	2R	12996818	12996888	-1.03385	0.00382328	71
FBgn0183131	intron_dsim_GLEANR_11350:3_dsim_GLEANR_11350:4	2R	13048496	13048568	-0.58438	0.0259374	73
FBgn0183134	intron_dsim_GLEANR_11353:1_dsim_GLEANR_11353:2	2R	13059888	13059947	0.69545	0.0448385	60
FBgn0196657	intron_dsim_GLEANR_9355:3_dsim_GLEANR_9355:4	2R	13362868	13362924	-0.664163	0.00078051	57
FBgn0183176	intron_dsim_GLEANR_11395:1_dsim_GLEANR_11395:2	2R	13646690	13646785	-0.533635	0.0242132	96
FBgn0183183	intron_dsim_GLEANR_11402:11_dsim_GLEANR_11402:12	2R	13821045	13821108	-0.81698	0.0156943	64
FBgn0183195	intron_dsim_GLEANR_11414:2_dsim_GLEANR_11414:3	2R	13942567	13942625	-1.18574	1.24717e-05	59
FBgn0183195	intron_dsim_GLEANR_11414:4_dsim_GLEANR_11414:5	2R	13943041	13943170	-0.652287	0.0123126	130
FBgn0183204	intron_dsim_GLEANR_11423:1_dsim_GLEANR_11423:2	2R	14042440	14042567	0.801575	0.0105981	128
FBgn0183204	intron_dsim_GLEANR_11423:2_dsim_GLEANR_11423:3	2R	14042691	14042750	0.691304	0.0378354	60
FBgn0196609	intron_dsim_GLEANR_9308:4_dsim_GLEANR_9308:5	2R	14259165	14259227	-0.751199	0.00724338	63
FBgn0196607	intron_dsim_GLEANR_9306:5_dsim_GLEANR_9306:6	2R	14275199	14275257	-0.725521	0.000194307	59
FBgn0196607	intron_dsim_GLEANR_9306:2_dsim_GLEANR_9306:3	2R	14276241	14276345	-0.739223	0.0106407	105
FBgn0183241	intron_dsim_GLEANR_11460:4_dsim_GLEANR_11460:5	2R	14779640	14779700	-1.10886	0.00521018	61
FBgn0082745	intron_dsim_GLEANR_9285:3_dsim_GLEANR_9285:4	2R	14825789	14825855	-0.406902	0.0320167	67
FBgn0183252	intron_dsim_GLEANR_11477:1_dsim_GLEANR_11477:2	2R	14893710	14893772	-0.915092	8.71644e-05	63
FBgn0183253	intron_dsim_GLEANR_11478:1_dsim_GLEANR_11478:2	2R	14895261	14895315	-0.68053	0.0381037	55
FBgn0183257	intron_dsim_GLEANR_11482:1_dsim_GLEANR_11482:2	2R	15048835	15048896	0.672845	0.0470936	62
FBgn0196566	intron_dsim_GLEANR_9252:5_dsim_GLEANR_9252:6	2R	15276251	15276314	-0.395839	0.0499334	64
FBgn0183293	intron_dsim_GLEANR_11518:2_dsim_GLEANR_11518:3	2R	15523886	15523944	-0.698069	0.00721788	59
FBgn0183293	intron_dsim_GLEANR_11518:4_dsim_GLEANR_11518:5	2R	15524668	15524731	0.583372	0.00404994	64
FBgn0183294	intron_dsim_GLEANR_11519:1_dsim_GLEANR_11519:2	2R	15537333	15537441	0.472088	0.0225741	109
FBgn0183295	intron_dsim_GLEANR_11520:2_dsim_GLEANR_11520:3	2R	15545090	15545154	-1.03623	0.00481378	65
FBgn0183297	intron_dsim_GLEANR_11522:3_dsim_GLEANR_11522:4	2R	15563055	15563805	0.67053	0.0102469	751
FBgn0183308	intron_dsim_GLEANR_11533:1_dsim_GLEANR_11533:2	2R	15689150	15689212	-1.21139	2.44293e-05	63
FBgn0183313	intron_dsim_GLEANR_11538:1_dsim_GLEANR_11538:2	2R	15712152	15716367	0.42531	0.047129	4216
FBgn0183318	intron_dsim_GLEANR_11543:1_dsim_GLEANR_11543:2	2R	15750219	15750284	-0.573629	0.00852501	66
FBgn0196529	intron_dsim_GLEANR_9216:2_dsim_GLEANR_9216:3	2R	15754810	15754865	-0.792114	0.0475501	56
FBgn0196524	intron_dsim_GLEANR_9211:1_dsim_GLEANR_9211:2	2R	15820482	15820541	0.89864	0.0199121	60
FBgn0196509	intron_dsim_GLEANR_9196:3_dsim_GLEANR_9196:4	2R	16035348	16035412	-0.764114	0.00491122	65
FBgn0196498	intron_dsim_GLEANR_9185:2_dsim_GLEANR_9185:3	2R	16142244	16142370	-0.835475	0.00159989	127
FBgn0196486	intron_dsim_GLEANR_9173:1_dsim_GLEANR_9173:2	2R	16224865	16224930	0.679942	0.0264996	66
FBgn0196483	intron_dsim_GLEANR_9170:1_dsim_GLEANR_9170:2	2R	16234899	16234969	-0.506038	0.000824821	71
FBgn0183362	intron_dsim_GLEANR_11585:1_dsim_GLEANR_11585:2	2R	16254711	16254784	-0.70362	0.000503285	74
FBgn0183366	intron_dsim_GLEANR_11589:5_dsim_GLEANR_11589:6	2R	16303234	16303300	-0.818754	0.0137743	67
FBgn0196461	intron_dsim_GLEANR_9148:4_dsim_GLEANR_9148:5	2R	16589180	16589237	-0.529297	0.0300515	58
FBgn0196456	intron_dsim_GLEANR_9143:6_dsim_GLEANR_9143:7	2R	16627001	16627173	-0.435389	0.0482183	173
FBgn0196442	intron_dsim_GLEANR_9130:3_dsim_GLEANR_9130:4	2R	16901659	16901828	-0.616223	0.0375105	170
FBgn0183408	intron_dsim_GLEANR_11629:2_dsim_GLEANR_11629:3	2R	16904442	16904505	-0.530993	0.0392943	64
FBgn0183419	intron_dsim_GLEANR_11639:2_dsim_GLEANR_11639:3	2R	17078822	17079044	0.954556	0.0379377	223
FBgn0183424	intron_dsim_GLEANR_11644:1_dsim_GLEANR_11644:2	2R	17139485	17140055	-0.736298	0.000424056	571
FBgn0183426	intron_dsim_GLEANR_11646:1_dsim_GLEANR_11646:2	2R	17142063	17142304	-0.456241	0.031886	242
FBgn0183428	intron_dsim_GLEANR_11648:2_dsim_GLEANR_11648:3	2R	17145321	17145373	0.909835	2.7033e-05	53
FBgn0183429	intron_dsim_GLEANR_11649:2_dsim_GLEANR_11649:3	2R	17148999	17149069	-0.603479	0.0231371	71
FBgn0183442	intron_dsim_GLEANR_11660:2_dsim_GLEANR_11660:3	2R	17248068	17248124	-0.853355	0.0265941	57
FBgn0183456	intron_dsim_GLEANR_11673:1_dsim_GLEANR_11673:2	2R	17336230	17336346	0.575984	0.0300515	117
FBgn0196380	intron_dsim_GLEANR_9068:3_dsim_GLEANR_9068:4	2R	17754551	17754637	-0.552638	0.000495429	87
FBgn0183487	intron_dsim_GLEANR_11704:3_dsim_GLEANR_11704:4	2R	17795730	17795785	-0.467371	0.0411901	56
FBgn0183494	intron_dsim_GLEANR_11711:2_dsim_GLEANR_11711:3	2R	17830171	17830234	0.796304	0.0160792	64
FBgn0196344	intron_dsim_GLEANR_9032:5_dsim_GLEANR_9032:6	2R	18058309	18058367	-0.390764	0.0416236	59
FBgn0183540	intron_dsim_GLEANR_11755:2_dsim_GLEANR_11755:3	2R	18299130	18299186	-0.697377	0.00111592	57
FBgn0196308	intron_dsim_GLEANR_8997:1_dsim_GLEANR_8997:2	2R	18353477	18353550	0.985025	0.00134574	74
FBgn0196307	intron_dsim_GLEANR_8996:3_dsim_GLEANR_8996:4	2R	18372245	18372320	0.482256	0.0461713	76
FBgn0196307	intron_dsim_GLEANR_8996:1_dsim_GLEANR_8996:2	2R	18372507	18372581	0.789091	2.13178e-05	75
FBgn0196298	intron_dsim_GLEANR_8987:7_dsim_GLEANR_8987:8	2R	18425180	18425239	-0.593914	0.0167799	60
FBgn0196298	intron_dsim_GLEANR_8987:6_dsim_GLEANR_8987:7	2R	18425464	18425527	-0.591213	0.0109081	64
FBgn0183572	intron_dsim_GLEANR_11787:1_dsim_GLEANR_11787:2	2R	18510337	18510431	0.88349	0.00783253	95
FBgn0183589	intron_dsim_GLEANR_11804:3_dsim_GLEANR_11804:4	2R	18646501	18646837	-0.58496	0.0167799	337
FBgn0069499	intron_dsim_GLEANR_8949:1_dsim_GLEANR_8949:2	2R	18848527	18848597	-0.749554	0.0421795	71
FBgn0196256	intron_dsim_GLEANR_8944:5_dsim_GLEANR_8944:6	2R	18907232	18907553	0.810088	0.00586287	322
FBgn0183612	intron_dsim_GLEANR_11826:3_dsim_GLEANR_11826:4	2R	18911039	18911094	-0.59025	0.0165375	56
FBgn0183612	intron_dsim_GLEANR_11826:5_dsim_GLEANR_11826:6	2R	18912579	18912637	-0.516871	0.0116755	59
FBgn0196236	intron_dsim_GLEANR_8923:10_dsim_GLEANR_8923:11	2R	19104333	19105986	-0.678094	0.0241814	1654
FBgn0196236	intron_dsim_GLEANR_8923:9_dsim_GLEANR_8923:10	2R	19106050	19106107	-0.584093	0.0437991	58
FBgn0196224	intron_dsim_GLEANR_8910:1_dsim_GLEANR_8910:2	2R	19274767	19274834	-0.727484	0.0182786	68
FBgn0196210	intron_dsim_GLEANR_8896:1_dsim_GLEANR_8896:2	2R	19500018	19500078	0.834149	0.013253	61
FBgn0185250	intron_dsim_GLEANR_13574:2_dsim_GLEANR_13574:3	3L	121885	121938	-0.585656	0.0268328	54
FBgn0185244	intron_dsim_GLEANR_13568:4_dsim_GLEANR_13568:5	3L	175506	175580	-0.611326	0.0479368	75
FBgn0185244	intron_dsim_GLEANR_13568:1_dsim_GLEANR_13568:2	3L	177352	177423	-0.788523	0.00404994	72
FBgn0185273	intron_dsim_GLEANR_13598:1_dsim_GLEANR_13598:2	3L	297659	298462	-0.47212	0.0423798	804
FBgn0185285	intron_dsim_GLEANR_13609:1_dsim_GLEANR_13609:2	3L	493476	494153	-0.505991	0.0235635	678
FBgn0185310	intron_dsim_GLEANR_13634:1_dsim_GLEANR_13634:2	3L	852156	852223	-0.865413	2.37353e-05	68
FBgn0185321	intron_dsim_GLEANR_13645:3_dsim_GLEANR_13645:4	3L	930312	930420	-0.799958	2.05434e-05	109
FBgn0185191	intron_dsim_GLEANR_13518:6_dsim_GLEANR_13518:7	3L	941669	943420	-0.763497	0.00350715	1752
FBgn0185191	intron_dsim_GLEANR_13518:4_dsim_GLEANR_13518:5	3L	944194	944539	-0.626505	0.0455186	346
FBgn0185178	intron_dsim_GLEANR_13505:1_dsim_GLEANR_13505:2	3L	1140264	1140337	-0.723362	0.00661509	74
FBgn0185344	intron_dsim_GLEANR_13669:1_dsim_GLEANR_13669:2	3L	1210196	1211346	0.785109	0.00159989	1151
FBgn0185344	intron_dsim_GLEANR_13669:2_dsim_GLEANR_13669:3	3L	1211486	1211545	0.688347	0.00534382	60
FBgn0185115	intron_dsim_GLEANR_13443:2_dsim_GLEANR_13443:3	3L	1791969	1792057	-0.935496	0.000769944	89
FBgn0185395	intron_dsim_GLEANR_13719:3_dsim_GLEANR_13719:4	3L	1998778	2002031	-0.598019	0.0392943	3254
FBgn0185401	intron_dsim_GLEANR_13725:5_dsim_GLEANR_13725:6	3L	2149006	2149068	-0.690052	0.0483159	63
FBgn0185408	intron_dsim_GLEANR_13731:1_dsim_GLEANR_13731:2	3L	2200592	2200756	0.946709	0.0190399	165
FBgn0185412	intron_dsim_GLEANR_13735:1_dsim_GLEANR_13735:2	3L	2217254	2217308	-1.24798	0.0202032	55
FBgn0185425	intron_dsim_GLEANR_13749:2_dsim_GLEANR_13749:3	3L	2569802	2569870	-0.757297	0.0277245	69
FBgn0185425	intron_dsim_GLEANR_13749:4_dsim_GLEANR_13749:5	3L	2571176	2571335	-0.869231	0.00381195	160
FBgn0185432	intron_dsim_GLEANR_13755:5_dsim_GLEANR_13755:6	3L	2609200	2609260	-0.454107	0.0499996	61
FBgn0185069	intron_dsim_GLEANR_13397:2_dsim_GLEANR_13397:3	3L	2687536	2687593	0.907244	0.00135334	58
FBgn0185054	intron_dsim_GLEANR_13381:1_dsim_GLEANR_13381:2	3L	2754265	2754438	-0.846804	6.22799e-06	174
FBgn0185447	intron_dsim_GLEANR_13771:1_dsim_GLEANR_13771:2	3L	2756100	2756347	0.541952	0.018179	248
FBgn0043399	intron_dsim_GLEANR_13358:1_dsim_GLEANR_13358:2	3L	3356533	3356595	1.16604	0.00215894	63
FBgn0185031	intron_dsim_GLEANR_13355:1_dsim_GLEANR_13355:2	3L	3448962	3449688	-1.13607	0.00168631	727
FBgn0185020	intron_dsim_GLEANR_13344:2_dsim_GLEANR_13344:3	3L	3562595	3562653	0.788665	0.0479368	59
FBgn0185506	intron_dsim_GLEANR_13833:3_dsim_GLEANR_13833:4	3L	3597154	3597206	-1.23921	0.00534382	53
FBgn0185011	intron_dsim_GLEANR_13336:12_dsim_GLEANR_13336:13	3L	3665151	3665222	-0.854556	0.0246771	72
FBgn0185523	intron_dsim_GLEANR_13851:1_dsim_GLEANR_13851:2	3L	3779744	3780042	-0.720555	0.0432314	299
FBgn0184987	intron_dsim_GLEANR_13313:1_dsim_GLEANR_13313:2	3L	3834417	3834476	0.584152	0.0309887	60
FBgn0184910	intron_dsim_GLEANR_13240:4_dsim_GLEANR_13240:5	3L	5077481	5077595	-0.613415	0.0182105	115
FBgn0184904	intron_dsim_GLEANR_13234:2_dsim_GLEANR_13234:3	3L	5118637	5118780	-0.804833	0.0403645	144
FBgn0184900	intron_dsim_GLEANR_13229:4_dsim_GLEANR_13229:5	3L	5268638	5269294	-0.340328	0.023357	657
FBgn0184885	intron_dsim_GLEANR_13214:2_dsim_GLEANR_13214:3	3L	5457241	5457469	-0.913267	0.0252865	229
FBgn0184884	intron_dsim_GLEANR_13213:1_dsim_GLEANR_13213:2	3L	5497862	5497925	0.792652	0.041074	64
FBgn0184853	intron_dsim_GLEANR_13183:9_dsim_GLEANR_13183:10	3L	5734297	5734366	-0.594668	0.0186019	70
FBgn0184819	intron_dsim_GLEANR_13149:1_dsim_GLEANR_13149:2	3L	6452350	6452411	-0.931732	5.53399e-06	62
FBgn0185720	intron_dsim_GLEANR_14047:5_dsim_GLEANR_14047:6	3L	7042823	7042896	-0.537573	0.00378628	74
FBgn0185730	intron_dsim_GLEANR_14058:2_dsim_GLEANR_14058:3	3L	7259680	7259739	-0.605054	0.0482183	60
FBgn0184756	intron_dsim_GLEANR_13088:6_dsim_GLEANR_13088:7	3L	7263102	7263168	-0.822709	0.0158437	67
FBgn0184751	intron_dsim_GLEANR_13083:9_dsim_GLEANR_13083:10	3L	7397245	7397322	-0.892203	0.0173123	78
FBgn0184750	intron_dsim_GLEANR_13082:5_dsim_GLEANR_13082:6	3L	7440637	7440692	-0.641003	0.000145205	56
FBgn0184750	intron_dsim_GLEANR_13082:4_dsim_GLEANR_13082:5	3L	7441331	7441398	-0.664943	0.00287005	68
FBgn0185749	intron_dsim_GLEANR_14077:5_dsim_GLEANR_14077:6	3L	7588934	7589025	0.432352	0.0273189	92
FBgn0185749	intron_dsim_GLEANR_14077:6_dsim_GLEANR_14077:7	3L	7589158	7589220	0.950112	0.000381021	63
FBgn0185794	intron_dsim_GLEANR_14122:5_dsim_GLEANR_14122:6	3L	7971118	7971182	-0.777607	0.000324275	65
FBgn0185804	intron_dsim_GLEANR_14131:2_dsim_GLEANR_14131:3	3L	8053538	8053598	0.559523	0.0352186	61
FBgn0185804	intron_dsim_GLEANR_14131:3_dsim_GLEANR_14131:4	3L	8054064	8054120	-0.579382	0.00570784	57
FBgn0184689	intron_dsim_GLEANR_13019:7_dsim_GLEANR_13019:8	3L	8171595	8175821	0.554135	0.0329554	4227
FBgn0184689	intron_dsim_GLEANR_13019:6_dsim_GLEANR_13019:7	3L	8175935	8176004	0.432131	0.0199121	70
FBgn0184684	intron_dsim_GLEANR_13014:1_dsim_GLEANR_13014:2	3L	8236401	8236456	0.793817	0.0460019	56
FBgn0184678	intron_dsim_GLEANR_13008:2_dsim_GLEANR_13008:3	3L	8377923	8378788	-0.44287	0.0242132	866
FBgn0184677	intron_dsim_GLEANR_13007:1_dsim_GLEANR_13007:2	3L	8394850	8394917	-0.654935	0.0470936	68
FBgn0184673	intron_dsim_GLEANR_13003:4_dsim_GLEANR_13003:5	3L	8413991	8414047	-0.458957	0.0162934	57
FBgn0185840	intron_dsim_GLEANR_14169:6_dsim_GLEANR_14169:7	3L	8514564	8514624	0.850174	0.0112474	61
FBgn0185843	intron_dsim_GLEANR_14172:1_dsim_GLEANR_14172:2	3L	8535929	8536029	-0.878649	0.0472128	101
FBgn0184662	intron_dsim_GLEANR_12992:2_dsim_GLEANR_12992:3	3L	8740455	8743966	0.514437	0.0378354	3512
FBgn0184651	intron_dsim_GLEANR_12981:5_dsim_GLEANR_12981:6	3L	8799419	8799471	-0.383625	0.0247205	53
FBgn0184630	intron_dsim_GLEANR_12961:6_dsim_GLEANR_12961:7	3L	9000578	9000635	0.721253	0.0171354	58
FBgn0184627	intron_dsim_GLEANR_12958:8_dsim_GLEANR_12958:9	3L	9054873	9054946	-0.766059	0.000216307	74
FBgn0185900	intron_dsim_GLEANR_14228:2_dsim_GLEANR_14228:3	3L	9104418	9104497	-0.647234	0.0207698	80
FBgn0184610	intron_dsim_GLEANR_12941:4_dsim_GLEANR_12941:5	3L	9238466	9238520	0.881824	0.0317366	55
FBgn0184604	intron_dsim_GLEANR_12935:1_dsim_GLEANR_12935:2	3L	9343146	9343209	-0.639065	0.014105	64
FBgn0184595	intron_dsim_GLEANR_12926:1_dsim_GLEANR_12926:2	3L	9546736	9546796	-0.963763	0.0251449	61
FBgn0184580	intron_dsim_GLEANR_12911:2_dsim_GLEANR_12911:3	3L	10027556	10032562	-0.639452	0.0238043	5007
FBgn0185940	intron_dsim_GLEANR_14267:3_dsim_GLEANR_14267:4	3L	10049736	10049889	0.967737	4.58739e-05	154
FBgn0185940	intron_dsim_GLEANR_14267:4_dsim_GLEANR_14267:5	3L	10049984	10050042	1.42034	9.64294e-06	59
FBgn0185947	intron_dsim_GLEANR_14273:6_dsim_GLEANR_14273:7	3L	10262873	10262972	-0.714695	4.58412e-06	100
FBgn0184551	intron_dsim_GLEANR_12884:2_dsim_GLEANR_12884:3	3L	10491267	10491340	0.469166	0.0380374	74
FBgn0012854	intron_dsim_GLEANR_12880:1_dsim_GLEANR_12880:2	3L	10499685	10500427	0.937506	0.00028237	743
FBgn0184539	intron_dsim_GLEANR_12872:4_dsim_GLEANR_12872:5	3L	10596163	10596226	-0.51326	0.0348988	64
FBgn0184539	intron_dsim_GLEANR_12872:2_dsim_GLEANR_12872:3	3L	10597313	10597377	-0.718043	0.0174226	65
FBgn0185984	intron_dsim_GLEANR_14308:1_dsim_GLEANR_14308:2	3L	10640249	10640988	0.522061	0.00601846	740
FBgn0186002	intron_dsim_GLEANR_14326:3_dsim_GLEANR_14326:4	3L	10995107	10995197	-0.802758	1.95102e-05	91
FBgn0184500	intron_dsim_GLEANR_12832:3_dsim_GLEANR_12832:4	3L	11175660	11176403	-0.683277	0.0370906	744
FBgn0184498	intron_dsim_GLEANR_12830:1_dsim_GLEANR_12830:2	3L	11191004	11191650	-0.854531	0.00158846	647
FBgn0184477	intron_dsim_GLEANR_12809:3_dsim_GLEANR_12809:4	3L	11486383	11486904	-0.66869	0.000221206	522
FBgn0184477	intron_dsim_GLEANR_12809:2_dsim_GLEANR_12809:3	3L	11487003	11487068	-0.79106	0.00717342	66
FBgn0184472	intron_dsim_GLEANR_12804:3_dsim_GLEANR_12804:4	3L	11508033	11508091	-0.67409	0.000382174	59
FBgn0012832	intron_dsim_GLEANR_14373:1_dsim_GLEANR_14373:2	3L	11554710	11554759	0.584275	0.022761	50
FBgn0186058	intron_dsim_GLEANR_14382:2_dsim_GLEANR_14382:3	3L	11770459	11770514	1.02409	0.0124863	56
FBgn0186066	intron_dsim_GLEANR_14390:6_dsim_GLEANR_14390:7	3L	11895179	11895254	-0.639009	0.0025167	76
FBgn0186086	intron_dsim_GLEANR_14409:2_dsim_GLEANR_14409:3	3L	12162878	12163010	-0.673714	0.025252	133
FBgn0186086	intron_dsim_GLEANR_14409:3_dsim_GLEANR_14409:4	3L	12163317	12163367	-0.597113	0.0172042	51
FBgn0184406	intron_dsim_GLEANR_12741:3_dsim_GLEANR_12741:4	3L	12407099	12407155	-1.31823	0.00118433	57
FBgn0184399	intron_dsim_GLEANR_12735:1_dsim_GLEANR_12735:2	3L	12636380	12636433	-0.590939	0.022761	54
FBgn0186125	intron_dsim_GLEANR_14447:1_dsim_GLEANR_14447:2	3L	12747158	12747239	0.707579	0.00172695	82
FBgn0186125	intron_dsim_GLEANR_14447:2_dsim_GLEANR_14447:3	3L	12747375	12747547	0.767592	1.96916e-05	173
FBgn0186133	intron_dsim_GLEANR_14455:1_dsim_GLEANR_14455:2	3L	12838910	12839224	-1.25396	5.2807e-05	315
FBgn0186148	intron_dsim_GLEANR_14469:1_dsim_GLEANR_14469:2	3L	13324252	13325407	-0.685896	0.043456	1156
FBgn0184363	intron_dsim_GLEANR_12699:1_dsim_GLEANR_12699:2	3L	13375655	13376084	-0.423874	0.00139155	430
FBgn0186166	intron_dsim_GLEANR_14486:1_dsim_GLEANR_14486:2	3L	13552434	13552493	-0.631233	0.0426692	60
FBgn0184349	intron_dsim_GLEANR_12685:1_dsim_GLEANR_12685:2	3L	13736073	13736466	-0.922195	0.0439263	394
FBgn0186173	intron_dsim_GLEANR_14493:1_dsim_GLEANR_14493:2	3L	13855139	13855442	0.674882	0.0240573	304
FBgn0184344	intron_dsim_GLEANR_12680:4_dsim_GLEANR_12680:5	3L	13859097	13859156	-0.589622	0.00619406	60
FBgn0184327	intron_dsim_GLEANR_12664:5_dsim_GLEANR_12664:6	3L	14093882	14093945	-0.582196	0.0316475	64
FBgn0184325	intron_dsim_GLEANR_12662:3_dsim_GLEANR_12662:4	3L	14100905	14100973	-0.471331	0.035361	69
FBgn0186212	intron_dsim_GLEANR_14534:1_dsim_GLEANR_14534:2	3L	14489229	14489351	-0.530164	0.0175571	123
FBgn0184289	intron_dsim_GLEANR_12628:1_dsim_GLEANR_12628:2	3L	14838014	14838074	-0.619176	0.0145718	61
FBgn0186230	intron_dsim_GLEANR_14552:2_dsim_GLEANR_14552:3	3L	14848298	14848407	-0.914872	0.0321994	110
FBgn0184286	intron_dsim_GLEANR_12625:1_dsim_GLEANR_12625:2	3L	14853989	14854242	-0.903889	0.0376354	254
FBgn0186235	intron_dsim_GLEANR_14558:7_dsim_GLEANR_14558:8	3L	14906852	14906918	-0.828255	0.00141718	67
FBgn0184257	intron_dsim_GLEANR_12595:5_dsim_GLEANR_12595:6	3L	15267581	15267641	0.856804	0.00711524	61
FBgn0184257	intron_dsim_GLEANR_12595:3_dsim_GLEANR_12595:4	3L	15268278	15277552	0.748925	0.0266046	9275
FBgn0186260	intron_dsim_GLEANR_14581:1_dsim_GLEANR_14581:2	3L	15290028	15290352	0.870406	0.0161898	325
FBgn0186272	intron_dsim_GLEANR_14593:5_dsim_GLEANR_14593:6	3L	15395626	15395841	-0.565476	0.0224985	216
FBgn0186272	intron_dsim_GLEANR_14593:12_dsim_GLEANR_14593:13	3L	15403827	15404089	-0.45708	0.0403026	263
FBgn0186273	intron_dsim_GLEANR_14594:1_dsim_GLEANR_14594:2	3L	15415820	15415872	1.00226	0.0267958	53
FBgn0186273	intron_dsim_GLEANR_14594:2_dsim_GLEANR_14594:3	3L	15416184	15416249	-0.931764	8.99421e-06	66
FBgn0186301	intron_dsim_GLEANR_14622:1_dsim_GLEANR_14622:2	3L	15650864	15650983	1.43204	0.0300515	120
FBgn0186315	intron_dsim_GLEANR_14636:1_dsim_GLEANR_14636:2	3L	15702171	15702226	0.749456	0.0400829	56
FBgn0184200	intron_dsim_GLEANR_12538:4_dsim_GLEANR_12538:5	3L	15742166	15742334	-0.460819	0.0011769	169
FBgn0184200	intron_dsim_GLEANR_12538:3_dsim_GLEANR_12538:4	3L	15742438	15742511	-0.604709	0.0150267	74
FBgn0186320	intron_dsim_GLEANR_14641:1_dsim_GLEANR_14641:2	3L	15749885	15750276	1.15069	6.90895e-05	392
FBgn0186330	intron_dsim_GLEANR_14651:4_dsim_GLEANR_14651:5	3L	15935148	15935681	0.812989	0.014105	534
FBgn0184180	intron_dsim_GLEANR_12516:3_dsim_GLEANR_12516:4	3L	15995897	15996491	-0.743356	0.0153919	595
FBgn0184179	intron_dsim_GLEANR_12515:3_dsim_GLEANR_12515:4	3L	16004871	16005166	-0.607909	8.91706e-05	296
FBgn0184179	intron_dsim_GLEANR_12515:2_dsim_GLEANR_12515:3	3L	16005300	16014274	-0.415446	0.0299425	8975
FBgn0184174	intron_dsim_GLEANR_12509:1_dsim_GLEANR_12509:2	3L	16119428	16119521	-0.398686	0.0251027	94
FBgn0184173	intron_dsim_GLEANR_12508:10_dsim_GLEANR_12508:11	3L	16124199	16124260	1.05296	0.0124863	62
FBgn0184164	intron_dsim_GLEANR_12499:3_dsim_GLEANR_12499:4	3L	16349043	16349105	-0.613457	0.0182105	63
FBgn0186369	intron_dsim_GLEANR_14691:4_dsim_GLEANR_14691:5	3L	16381758	16382130	-0.848176	0.000692455	373
FBgn0186402	intron_dsim_GLEANR_14723:2_dsim_GLEANR_14723:3	3L	17088171	17088224	-0.973975	0.0161598	54
FBgn0083441	intron_dsim_GLEANR_14727:2_dsim_GLEANR_14727:3	3L	17182958	17183124	-0.519558	0.0123636	167
FBgn0184080	intron_dsim_GLEANR_12416:4_dsim_GLEANR_12416:5	3L	17623762	17623818	-0.79865	0.0141013	57
FBgn0186429	intron_dsim_GLEANR_14750:7_dsim_GLEANR_14750:8	3L	17909680	17909748	0.855642	0.0463337	69
FBgn0186438	intron_dsim_GLEANR_14760:1_dsim_GLEANR_14760:2	3L	17989712	17989772	-1.09814	0.000836366	61
FBgn0184063	intron_dsim_GLEANR_12399:1_dsim_GLEANR_12399:2	3L	17993033	17993229	-1.0868	0.00553878	197
FBgn0022505	intron_dsim_GLEANR_14766:1_dsim_GLEANR_14766:2	3L	18117845	18121329	0.584481	0.0300515	3485
FBgn0184056	intron_dsim_GLEANR_12392:6_dsim_GLEANR_12392:7	3L	18177565	18177630	0.603602	0.00287005	66
FBgn0184055	intron_dsim_GLEANR_12391:1_dsim_GLEANR_12391:2	3L	18196724	18196805	0.66488	0.0491904	82
FBgn0186484	intron_dsim_GLEANR_14809:1_dsim_GLEANR_14809:2	3L	18870489	18870662	-0.581094	0.00248322	174
FBgn0186507	intron_dsim_GLEANR_14832:10_dsim_GLEANR_14832:11	3L	19164198	19164261	-0.823126	0.0242132	64
FBgn0186510	intron_dsim_GLEANR_14835:1_dsim_GLEANR_14835:2	3L	19204223	19204290	-0.691183	0.00298051	68
FBgn0183970	intron_dsim_GLEANR_12304:2_dsim_GLEANR_12304:3	3L	19267423	19267486	-0.720214	0.0491904	64
FBgn0186521	intron_dsim_GLEANR_14846:1_dsim_GLEANR_14846:2	3L	19278587	19278650	0.725244	0.0352129	64
FBgn0183967	intron_dsim_GLEANR_12301:4_dsim_GLEANR_12301:5	3L	19303740	19303804	-0.776706	0.0392943	65
FBgn0183967	intron_dsim_GLEANR_12301:2_dsim_GLEANR_12301:3	3L	19304293	19304343	-0.675079	0.00375083	51
FBgn0183958	intron_dsim_GLEANR_12291:2_dsim_GLEANR_12291:3	3L	19406133	19406237	-0.666353	0.0416236	105
FBgn0183942	intron_dsim_GLEANR_12276:10_dsim_GLEANR_12276:11	3L	19597022	19597080	-0.908874	0.0111797	59
FBgn0186555	intron_dsim_GLEANR_14881:2_dsim_GLEANR_14881:3	3L	19738367	19739398	-0.457705	0.022761	1032
FBgn0186557	intron_dsim_GLEANR_14883:5_dsim_GLEANR_14883:6	3L	19782542	19782598	-0.590483	0.0256758	57
FBgn0183921	intron_dsim_GLEANR_12255:4_dsim_GLEANR_12255:5	3L	19787213	19787275	-1.33193	4.01441e-06	63
FBgn0183921	intron_dsim_GLEANR_12255:3_dsim_GLEANR_12255:4	3L	19787930	19787987	-1.12866	0.00453839	58
FBgn0183921	intron_dsim_GLEANR_12255:2_dsim_GLEANR_12255:3	3L	19788372	19788438	-1.02299	0.0458158	67
FBgn0183918	intron_dsim_GLEANR_12252:1_dsim_GLEANR_12252:2	3L	19821169	19822712	-0.572482	0.0467644	1544
FBgn0186569	intron_dsim_GLEANR_14895:1_dsim_GLEANR_14895:2	3L	19853677	19854814	-0.450038	0.0224985	1138
FBgn0186579	intron_dsim_GLEANR_14905:1_dsim_GLEANR_14905:2	3L	20128190	20128248	-0.455375	0.0247948	59
FBgn0183889	intron_dsim_GLEANR_12221:9_dsim_GLEANR_12221:10	3L	20310569	20310627	-0.38787	0.0451935	59
FBgn0186601	intron_dsim_GLEANR_14927:1_dsim_GLEANR_14927:2	3L	20382123	20382187	-0.590894	0.00105911	65
FBgn0183872	intron_dsim_GLEANR_12205:1_dsim_GLEANR_12205:2	3L	20561455	20561610	-0.539009	0.0113578	156
FBgn0186615	intron_dsim_GLEANR_14940:3_dsim_GLEANR_14940:4	3L	20570674	20570735	0.710763	0.0404079	62
FBgn0183867	intron_dsim_GLEANR_12200:1_dsim_GLEANR_12200:2	3L	20619916	20626139	0.746214	0.00852501	6224
FBgn0186626	intron_dsim_GLEANR_14950:4_dsim_GLEANR_14950:5	3L	20693015	20693115	-0.938788	2.13502e-07	101
FBgn0186634	intron_dsim_GLEANR_14958:3_dsim_GLEANR_14958:4	3L	20776626	20776698	-0.346555	0.0426692	73
FBgn0186643	intron_dsim_GLEANR_14967:1_dsim_GLEANR_14967:2	3L	20866913	20866982	0.714665	0.0044515	70
FBgn0186645	intron_dsim_GLEANR_14969:1_dsim_GLEANR_14969:2	3L	20894964	20895021	-0.788156	0.0151476	58
FBgn0186656	intron_dsim_GLEANR_14979:2_dsim_GLEANR_14979:3	3L	20977119	20977874	-0.893706	0.0472903	756
FBgn0183815	intron_dsim_GLEANR_12147:1_dsim_GLEANR_12147:2	3L	21409703	21410308	-0.973342	5.11153e-05	606
FBgn0186691	intron_dsim_GLEANR_15011:1_dsim_GLEANR_15011:2	3L	21416571	21416644	0.348932	0.0219998	74
FBgn0183785	intron_dsim_GLEANR_12116:1_dsim_GLEANR_12116:2	3L	22327960	22328018	0.803843	0.0491904	59
FBgn0191180	intron_dsim_GLEANR_3480:1_dsim_GLEANR_3480:2	3R	208640	208775	-0.545929	0.0293883	136
FBgn0191169	intron_dsim_GLEANR_3470:4_dsim_GLEANR_3470:5	3R	315551	315609	-0.454553	0.0317366	59
FBgn0191166	intron_dsim_GLEANR_3467:6_dsim_GLEANR_3467:7	3R	352606	353329	-0.696869	0.0131566	724
FBgn0191166	intron_dsim_GLEANR_3467:2_dsim_GLEANR_3467:3	3R	354180	354246	0.594571	0.00680048	67
FBgn0191152	intron_dsim_GLEANR_3451:4_dsim_GLEANR_3451:5	3R	611338	615564	0.690845	0.0470936	4227
FBgn0191269	intron_dsim_GLEANR_3572:3_dsim_GLEANR_3572:4	3R	1240004	1240210	-0.521565	0.00757213	207
FBgn0191271	intron_dsim_GLEANR_3574:1_dsim_GLEANR_3574:2	3R	1252839	1252900	-1.0501	0.000638855	62
FBgn0191108	intron_dsim_GLEANR_3408:2_dsim_GLEANR_3408:3	3R	1323422	1323490	0.700025	0.0266004	69
FBgn0191276	intron_dsim_GLEANR_3579:1_dsim_GLEANR_3579:2	3R	1325847	1325899	-0.826649	4.78431e-05	53
FBgn0191099	intron_dsim_GLEANR_3398:6_dsim_GLEANR_3398:7	3R	1419618	1419680	-1.05946	0.0186654	63
FBgn0191099	intron_dsim_GLEANR_3398:1_dsim_GLEANR_3398:2	3R	1424112	1424181	-0.980843	0.0167777	70
FBgn0191295	intron_dsim_GLEANR_3598:3_dsim_GLEANR_3598:4	3R	1512338	1512981	-0.45108	0.0293883	644
FBgn0191309	intron_dsim_GLEANR_3611:2_dsim_GLEANR_3611:3	3R	1642392	1642451	-0.564855	0.0161989	60
FBgn0191310	intron_dsim_GLEANR_3612:2_dsim_GLEANR_3612:3	3R	1647999	1648059	-0.807207	0.00813402	61
FBgn0191317	intron_dsim_GLEANR_3619:1_dsim_GLEANR_3619:2	3R	1684795	1684841	-0.660118	0.00330365	47
FBgn0041892	intron_dsim_GLEANR_3362:3_dsim_GLEANR_3362:4	3R	1834832	1834891	1.36686	0.0477587	60
FBgn0191056	intron_dsim_GLEANR_3353:4_dsim_GLEANR_3353:5	3R	1946528	1946965	-0.821639	0.0114397	438
FBgn0191056	intron_dsim_GLEANR_3353:2_dsim_GLEANR_3353:3	3R	1947432	1947570	-0.829171	0.0372801	139
FBgn0191326	intron_dsim_GLEANR_3628:1_dsim_GLEANR_3628:2	3R	1975793	1975848	-0.759418	0.0476882	56
FBgn0191358	intron_dsim_GLEANR_3660:2_dsim_GLEANR_3660:3	3R	2208359	2209375	-0.846597	0.0314461	1017
FBgn0191360	intron_dsim_GLEANR_3663:3_dsim_GLEANR_3663:4	3R	2234797	2234851	-0.524205	0.03592	55
FBgn0191362	intron_dsim_GLEANR_3665:3_dsim_GLEANR_3665:4	3R	2291752	2292274	-0.725855	0.014807	523
FBgn0083456	intron_dsim_GLEANR_3678:3_dsim_GLEANR_3678:4	3R	2516856	2516916	-0.507948	0.0478862	61
FBgn0191007	intron_dsim_GLEANR_3302:3_dsim_GLEANR_3302:4	3R	2938843	2938919	-0.672425	0.0266046	77
FBgn0191007	intron_dsim_GLEANR_3302:2_dsim_GLEANR_3302:3	3R	2939392	2939443	-0.706597	0.0336196	52
FBgn0191005	intron_dsim_GLEANR_3300:4_dsim_GLEANR_3300:5	3R	2949763	2949823	-0.53126	0.0470936	61
FBgn0191393	intron_dsim_GLEANR_3699:1_dsim_GLEANR_3699:2	3R	2952010	2952510	0.473207	0.0476846	501
FBgn0190992	intron_dsim_GLEANR_3288:1_dsim_GLEANR_3288:2	3R	3075945	3075998	0.906722	0.0418108	54
FBgn0190940	intron_dsim_GLEANR_3235:4_dsim_GLEANR_3235:5	3R	3874479	3874539	0.616414	0.0292011	61
FBgn0191453	intron_dsim_GLEANR_3758:4_dsim_GLEANR_3758:5	3R	4022306	4023412	-0.703382	0.0052289	1107
FBgn0191456	intron_dsim_GLEANR_3761:2_dsim_GLEANR_3761:3	3R	4075143	4075199	-0.884641	0.00260511	57
FBgn0190914	intron_dsim_GLEANR_3209:2_dsim_GLEANR_3209:3	3R	4349806	4349869	4.4117	1.59664e-26	64
FBgn0190914	intron_dsim_GLEANR_3209:1_dsim_GLEANR_3209:2	3R	4350004	4350310	3.86809	8.51698e-29	307
FBgn0190913	intron_dsim_GLEANR_3208:1_dsim_GLEANR_3208:2	3R	4362893	4362948	-0.439639	0.0300515	56
FBgn0190900	intron_dsim_GLEANR_3197:1_dsim_GLEANR_3197:2	3R	4503118	4503183	0.774543	0.0125471	66
FBgn0191489	intron_dsim_GLEANR_3793:7_dsim_GLEANR_3793:8	3R	4510950	4511043	-1.11361	6.22799e-06	94
FBgn0190889	intron_dsim_GLEANR_3186:8_dsim_GLEANR_3186:9	3R	4652381	4652504	0.367386	0.0386525	124
FBgn0190889	intron_dsim_GLEANR_3186:3_dsim_GLEANR_3186:4	3R	4667178	4667631	0.613562	0.0420961	454
FBgn0190888	intron_dsim_GLEANR_3185:4_dsim_GLEANR_3185:5	3R	4706101	4706309	0.832883	0.0080009	209
FBgn0190879	intron_dsim_GLEANR_3175:8_dsim_GLEANR_3175:9	3R	4795138	4795217	-0.554178	0.0337417	80
FBgn0190879	intron_dsim_GLEANR_3175:5_dsim_GLEANR_3175:6	3R	4795921	4795984	-0.561334	0.0468246	64
FBgn0191513	intron_dsim_GLEANR_3818:1_dsim_GLEANR_3818:2	3R	4813787	4813845	-0.817541	2.71626e-05	59
FBgn0191513	intron_dsim_GLEANR_3818:2_dsim_GLEANR_3818:3	3R	4813960	4814020	-0.722389	0.00601846	61
FBgn0191513	intron_dsim_GLEANR_3818:3_dsim_GLEANR_3818:4	3R	4814236	4814602	-0.571846	0.00264026	367
FBgn0191525	intron_dsim_GLEANR_3830:2_dsim_GLEANR_3830:3	3R	4961784	4961850	0.638042	0.0300217	67
FBgn0190868	intron_dsim_GLEANR_3164:1_dsim_GLEANR_3164:2	3R	4967104	4968406	-1.1967	2.09049e-05	1303
FBgn0190862	intron_dsim_GLEANR_3158:1_dsim_GLEANR_3158:2	3R	5054179	5054240	0.782539	0.0432314	62
FBgn0190861	intron_dsim_GLEANR_3157:4_dsim_GLEANR_3157:5	3R	5062619	5062679	-0.720969	0.0101226	61
FBgn0191536	intron_dsim_GLEANR_3840:3_dsim_GLEANR_3840:4	3R	5064256	5064396	-0.416748	0.0175051	141
FBgn0191541	intron_dsim_GLEANR_3845:1_dsim_GLEANR_3845:2	3R	5102624	5102749	-0.838925	0.0215911	126
FBgn0190852	intron_dsim_GLEANR_3148:1_dsim_GLEANR_3148:2	3R	5292067	5292141	-0.751771	0.0428352	75
FBgn0191559	intron_dsim_GLEANR_3863:3_dsim_GLEANR_3863:4	3R	5536730	5536791	-0.610294	0.00297235	62
FBgn0190824	intron_dsim_GLEANR_3119:4_dsim_GLEANR_3119:5	3R	5736224	5736663	-0.837347	0.000931162	440
FBgn0191574	intron_dsim_GLEANR_3879:4_dsim_GLEANR_3879:5	3R	5749114	5749180	-0.478218	0.00147777	67
FBgn0191579	intron_dsim_GLEANR_3884:3_dsim_GLEANR_3884:4	3R	5792226	5792282	-0.824754	0.00149138	57
FBgn0190815	intron_dsim_GLEANR_3109:1_dsim_GLEANR_3109:2	3R	5881292	5881349	0.831087	0.0412964	58
FBgn0191582	intron_dsim_GLEANR_3887:1_dsim_GLEANR_3887:2	3R	5885861	5885915	-1.24605	1.99658e-05	55
FBgn0191582	intron_dsim_GLEANR_3887:2_dsim_GLEANR_3887:3	3R	5886428	5886489	-1.47423	3.57126e-06	62
FBgn0190812	intron_dsim_GLEANR_3106:4_dsim_GLEANR_3106:5	3R	5898603	5898662	0.768712	0.040448	60
FBgn0190803	intron_dsim_GLEANR_3098:3_dsim_GLEANR_3098:4	3R	6035084	6035142	1.06568	0.000962906	59
FBgn0190790	intron_dsim_GLEANR_3085:4_dsim_GLEANR_3085:5	3R	6249438	6249498	-1.9519	6.06166e-08	61
FBgn0190790	intron_dsim_GLEANR_3085:3_dsim_GLEANR_3085:4	3R	6249681	6249736	-2.05516	0.000366063	56
FBgn0190776	intron_dsim_GLEANR_3070:2_dsim_GLEANR_3070:3	3R	6516616	6516667	1.17327	0.00364847	52
FBgn0190773	intron_dsim_GLEANR_3066:1_dsim_GLEANR_3066:2	3R	6617028	6617090	-0.593275	0.00143296	63
FBgn0190762	intron_dsim_GLEANR_3055:2_dsim_GLEANR_3055:3	3R	6721023	6721130	-0.83781	6.90895e-05	108
FBgn0191641	intron_dsim_GLEANR_3947:1_dsim_GLEANR_3947:2	3R	7044747	7044811	0.941216	0.0020013	65
FBgn0043395	intron_dsim_GLEANR_3951:7_dsim_GLEANR_3951:8	3R	7226507	7230112	-0.708364	0.0480241	3606
FBgn0191648	intron_dsim_GLEANR_3954:2_dsim_GLEANR_3954:3	3R	7257223	7257281	-0.794187	0.00280642	59
FBgn0191648	intron_dsim_GLEANR_3954:3_dsim_GLEANR_3954:4	3R	7257541	7257602	-0.54243	0.0100344	62
FBgn0190710	intron_dsim_GLEANR_3006:1_dsim_GLEANR_3006:2	3R	7483734	7485185	-0.754973	0.0432314	1452
FBgn0191723	intron_dsim_GLEANR_4028:5_dsim_GLEANR_4028:6	3R	8497125	8497186	-0.781244	0.00197576	62
FBgn0190633	intron_dsim_GLEANR_2928:10_dsim_GLEANR_2928:11	3R	8640441	8640610	0.532496	0.0438813	170
FBgn0190624	intron_dsim_GLEANR_2918:4_dsim_GLEANR_2918:5	3R	9008985	9009051	0.902649	8.15608e-05	67
FBgn0190622	intron_dsim_GLEANR_2916:4_dsim_GLEANR_2916:5	3R	9021873	9021927	0.637932	0.00677372	55
FBgn0190622	intron_dsim_GLEANR_2916:2_dsim_GLEANR_2916:3	3R	9023206	9023262	0.616083	0.0271566	57
FBgn0191772	intron_dsim_GLEANR_4079:1_dsim_GLEANR_4079:2	3R	9286065	9286123	1.08776	0.00711522	59
FBgn0191772	intron_dsim_GLEANR_4079:2_dsim_GLEANR_4079:3	3R	9286278	9286975	-0.671989	0.00554818	698
FBgn0190593	intron_dsim_GLEANR_2889:2_dsim_GLEANR_2889:3	3R	9347237	9350009	0.605544	0.0405554	2773
FBgn0190588	intron_dsim_GLEANR_2884:2_dsim_GLEANR_2884:3	3R	9446439	9446505	-0.618699	0.0324304	67
FBgn0190581	intron_dsim_GLEANR_2877:5_dsim_GLEANR_2877:6	3R	9547979	9548050	-0.739196	0.0462761	72
FBgn0191785	intron_dsim_GLEANR_4093:1_dsim_GLEANR_4093:2	3R	9605109	9605241	-0.859653	0.0356789	133
FBgn0189329	intron_dsim_GLEANR_18075:1_dsim_GLEANR_18075:2	3R	9701840	9701901	1.13214	0.0192193	62
FBgn0190561	intron_dsim_GLEANR_2856:2_dsim_GLEANR_2856:3	3R	9801437	9801500	-0.46974	0.0188415	64
FBgn0190561	intron_dsim_GLEANR_2856:1_dsim_GLEANR_2856:2	3R	9801752	9801816	-0.540196	0.0435176	65
FBgn0190555	intron_dsim_GLEANR_2850:5_dsim_GLEANR_2850:6	3R	9855902	9855979	-0.666845	0.0300515	78
FBgn0191805	intron_dsim_GLEANR_4112:1_dsim_GLEANR_4112:2	3R	9892637	9892702	-0.588632	0.0151476	66
FBgn0190544	intron_dsim_GLEANR_2840:2_dsim_GLEANR_2840:3	3R	9960833	9960898	-0.590871	0.0175951	66
FBgn0012823	intron_dsim_GLEANR_2829:1_dsim_GLEANR_2829:2	3R	10211236	10211300	-0.972595	0.00141718	65
FBgn0190531	intron_dsim_GLEANR_2827:1_dsim_GLEANR_2827:2	3R	10240306	10240428	-0.725918	0.00731471	123
FBgn0191833	intron_dsim_GLEANR_4140:1_dsim_GLEANR_4140:2	3R	10301603	10302355	0.585509	0.0479368	753
FBgn0191852	intron_dsim_GLEANR_4159:6_dsim_GLEANR_4159:7	3R	10446667	10446738	-0.650905	0.00135334	72
FBgn0191852	intron_dsim_GLEANR_4159:10_dsim_GLEANR_4159:11	3R	10448695	10448758	-0.860083	5.22463e-05	64
FBgn0191854	intron_dsim_GLEANR_4161:4_dsim_GLEANR_4161:5	3R	10493262	10493695	-0.626605	0.00661509	434
FBgn0190492	intron_dsim_GLEANR_2788:5_dsim_GLEANR_2788:6	3R	10743421	10743494	-0.466063	0.0124863	74
FBgn0191869	intron_dsim_GLEANR_4176:1_dsim_GLEANR_4176:2	3R	10749684	10749757	-0.545104	0.00596232	74
FBgn0191869	intron_dsim_GLEANR_4176:2_dsim_GLEANR_4176:3	3R	10749940	10750079	-0.560905	0.0194188	140
FBgn0191873	intron_dsim_GLEANR_4181:2_dsim_GLEANR_4181:3	3R	10888964	10889019	-1.03494	0.00034282	56
FBgn0191876	intron_dsim_GLEANR_4184:2_dsim_GLEANR_4184:3	3R	10908201	10909284	0.539875	0.00626607	1084
FBgn0191881	intron_dsim_GLEANR_4189:1_dsim_GLEANR_4189:2	3R	11008196	11008271	-0.469237	0.0167463	76
FBgn0191881	intron_dsim_GLEANR_4189:6_dsim_GLEANR_4189:7	3R	11010080	11010141	-1.28323	4.93001e-05	62
FBgn0190473	intron_dsim_GLEANR_2769:1_dsim_GLEANR_2769:2	3R	11109962	11110039	1.03868	0.0246524	78
FBgn0191921	intron_dsim_GLEANR_4229:1_dsim_GLEANR_4229:2	3R	11452669	11452749	-0.564184	0.0139876	81
FBgn0190454	intron_dsim_GLEANR_2749:9_dsim_GLEANR_2749:10	3R	11523182	11523425	-0.937585	0.00597163	244
FBgn0190445	intron_dsim_GLEANR_2740:2_dsim_GLEANR_2740:3	3R	11819176	11819239	-1.00173	0.00215894	64
FBgn0191947	intron_dsim_GLEANR_4254:2_dsim_GLEANR_4254:3	3R	11898851	11899089	-1.82161	0.00229132	239
FBgn0190430	intron_dsim_GLEANR_2727:2_dsim_GLEANR_2727:3	3R	11931334	11931394	-0.645077	0.0150267	61
FBgn0191957	intron_dsim_GLEANR_4264:4_dsim_GLEANR_4264:5	3R	11968174	11968257	-0.465863	0.0360424	84
FBgn0190426	intron_dsim_GLEANR_2723:1_dsim_GLEANR_2723:2	3R	11978709	11978785	-0.446254	0.0294207	77
FBgn0190417	intron_dsim_GLEANR_2715:1_dsim_GLEANR_2715:2	3R	12223766	12223872	-0.568346	0.00159989	107
FBgn0190404	intron_dsim_GLEANR_2702:3_dsim_GLEANR_2702:4	3R	12316413	12316476	-0.576307	0.0010793	64
FBgn0190400	intron_dsim_GLEANR_2698:1_dsim_GLEANR_2698:2	3R	12409635	12409683	1.47846	4.58739e-05	49
FBgn0190389	intron_dsim_GLEANR_2687:1_dsim_GLEANR_2687:2	3R	12551281	12551671	-0.615051	0.0214369	391
FBgn0190379	intron_dsim_GLEANR_2676:1_dsim_GLEANR_2676:2	3R	12612496	12612558	-0.503388	0.0486322	63
FBgn0192003	intron_dsim_GLEANR_4310:2_dsim_GLEANR_4310:3	3R	12636980	12637043	-0.60096	0.0180249	64
FBgn0190370	intron_dsim_GLEANR_2666:2_dsim_GLEANR_2666:3	3R	12893218	12897886	-0.817188	0.00496776	4669
FBgn0190367	intron_dsim_GLEANR_2663:3_dsim_GLEANR_2663:4	3R	12921575	12921866	-0.813273	0.00075309	292
FBgn0190361	intron_dsim_GLEANR_2658:1_dsim_GLEANR_2658:2	3R	12964326	12964378	1.24586	0.00757137	53
FBgn0190358	intron_dsim_GLEANR_2655:2_dsim_GLEANR_2655:3	3R	12970122	12970390	-0.637528	0.0150267	269
FBgn0192024	intron_dsim_GLEANR_4332:1_dsim_GLEANR_4332:2	3R	12971895	12973118	1.18708	0.000860999	1224
FBgn0190353	intron_dsim_GLEANR_2647:1_dsim_GLEANR_2647:2	3R	13115634	13115709	-1.15019	3.57126e-06	76
FBgn0192040	intron_dsim_GLEANR_4349:2_dsim_GLEANR_4349:3	3R	13164243	13164310	-1.7564	0.0458158	68
FBgn0192042	intron_dsim_GLEANR_4351:1_dsim_GLEANR_4351:2	3R	13168958	13169212	0.539034	0.0230875	255
FBgn0192080	intron_dsim_GLEANR_4387:7_dsim_GLEANR_4387:8	3R	13579318	13579385	-0.592648	0.00375083	68
FBgn0192083	intron_dsim_GLEANR_4390:3_dsim_GLEANR_4390:4	3R	13586456	13586898	-0.662755	0.0209286	443
FBgn0190310	intron_dsim_GLEANR_2602:4_dsim_GLEANR_2602:5	3R	13596040	13596095	0.586412	0.0483159	56
FBgn0190310	intron_dsim_GLEANR_2602:3_dsim_GLEANR_2602:4	3R	13596237	13596296	0.957038	0.00916098	60
FBgn0190310	intron_dsim_GLEANR_2602:2_dsim_GLEANR_2602:3	3R	13596783	13596839	-1.40578	0.00533938	57
FBgn0192086	intron_dsim_GLEANR_4393:1_dsim_GLEANR_4393:2	3R	13601617	13601678	-0.689332	0.0458158	62
FBgn0192104	intron_dsim_GLEANR_4411:3_dsim_GLEANR_4411:4	3R	13813412	13813477	0.587237	0.0386718	66
FBgn0192109	intron_dsim_GLEANR_4416:1_dsim_GLEANR_4416:2	3R	13880653	13880725	-1.55547	0.00251629	73
FBgn0192110	intron_dsim_GLEANR_4417:3_dsim_GLEANR_4417:4	3R	13884211	13884262	0.871101	0.0300515	52
FBgn0192111	intron_dsim_GLEANR_4418:2_dsim_GLEANR_4418:3	3R	13887317	13887378	-1.53167	0.035094	62
FBgn0190275	intron_dsim_GLEANR_2566:1_dsim_GLEANR_2566:2	3R	14113750	14113802	-0.765492	0.00592703	53
FBgn0190272	intron_dsim_GLEANR_2563:5_dsim_GLEANR_2563:6	3R	14125341	14125397	-0.695749	0.0397435	57
FBgn0190266	intron_dsim_GLEANR_2557:1_dsim_GLEANR_2557:2	3R	14294200	14294466	0.437147	0.0234458	267
FBgn0190260	intron_dsim_GLEANR_2551:5_dsim_GLEANR_2551:6	3R	14318896	14319146	-0.485291	0.00189076	251
FBgn0190259	intron_dsim_GLEANR_2550:3_dsim_GLEANR_2550:4	3R	14326180	14326235	-0.936436	0.0155737	56
FBgn0190210	intron_dsim_GLEANR_2504:2_dsim_GLEANR_2504:3	3R	15218997	15219058	-0.681756	0.00519189	62
FBgn0190203	intron_dsim_GLEANR_2498:6_dsim_GLEANR_2498:7	3R	15265142	15265801	-0.628692	0.0478862	660
FBgn0190203	intron_dsim_GLEANR_2498:4_dsim_GLEANR_2498:5	3R	15268682	15269155	-0.652573	0.0133888	474
FBgn0192201	intron_dsim_GLEANR_4508:8_dsim_GLEANR_4508:9	3R	15446151	15446733	-0.56928	0.0190573	583
FBgn0192210	intron_dsim_GLEANR_4516:4_dsim_GLEANR_4516:5	3R	15537276	15537334	-0.504392	0.0404484	59
FBgn0192218	intron_dsim_GLEANR_4524:1_dsim_GLEANR_4524:2	3R	15701967	15702032	0.571353	0.025436	66
FBgn0192219	intron_dsim_GLEANR_4525:1_dsim_GLEANR_4525:2	3R	15703338	15703409	-1.27715	5.64987e-11	72
FBgn0190172	intron_dsim_GLEANR_2468:2_dsim_GLEANR_2468:3	3R	15718732	15718792	-0.77574	0.000469595	61
FBgn0190166	intron_dsim_GLEANR_2462:4_dsim_GLEANR_2462:5	3R	15744060	15744114	-0.512779	0.0375105	55
FBgn0190166	intron_dsim_GLEANR_2462:3_dsim_GLEANR_2462:4	3R	15744477	15744537	0.832658	0.00574041	61
FBgn0190162	intron_dsim_GLEANR_2459:7_dsim_GLEANR_2459:8	3R	15765316	15765373	-0.840045	0.00375083	58
FBgn0192232	intron_dsim_GLEANR_4539:2_dsim_GLEANR_4539:3	3R	15783696	15783834	-0.731815	0.0113578	139
FBgn0192241	intron_dsim_GLEANR_4549:3_dsim_GLEANR_4549:4	3R	15881600	15881691	-0.240454	0.040038	92
FBgn0192246	intron_dsim_GLEANR_4554:1_dsim_GLEANR_4554:2	3R	15932461	15932517	0.596863	0.00017459	57
FBgn0192247	intron_dsim_GLEANR_4555:2_dsim_GLEANR_4555:3	3R	15934578	15934955	0.840906	0.0266046	378
FBgn0192249	intron_dsim_GLEANR_4557:2_dsim_GLEANR_4557:3	3R	15942507	15942601	-0.546943	0.00106538	95
FBgn0192264	intron_dsim_GLEANR_4573:1_dsim_GLEANR_4573:2	3R	16101541	16101608	-0.82666	0.023216	68
FBgn0190119	intron_dsim_GLEANR_2417:3_dsim_GLEANR_2417:4	3R	16234221	16234709	-0.680145	6.90895e-05	489
FBgn0190103	intron_dsim_GLEANR_2401:8_dsim_GLEANR_2401:9	3R	16547620	16548223	-0.545393	0.0132298	604
FBgn0190103	intron_dsim_GLEANR_2401:7_dsim_GLEANR_2401:8	3R	16548394	16548461	-0.459058	0.00594207	68
FBgn0190089	intron_dsim_GLEANR_2387:1_dsim_GLEANR_2387:2	3R	16747635	16747695	-0.565073	0.0175571	61
FBgn0190074	intron_dsim_GLEANR_2373:2_dsim_GLEANR_2373:3	3R	16879775	16879840	-1.04791	0.0467263	66
FBgn0192321	intron_dsim_GLEANR_4628:1_dsim_GLEANR_4628:2	3R	16886081	16886177	-0.749202	0.0406375	97
FBgn0190061	intron_dsim_GLEANR_2360:1_dsim_GLEANR_2360:2	3R	17094063	17094131	-0.817187	3.38071e-07	69
FBgn0190036	intron_dsim_GLEANR_2335:2_dsim_GLEANR_2335:3	3R	17323840	17326942	-0.887132	0.00436025	3103
FBgn0190034	intron_dsim_GLEANR_2333:3_dsim_GLEANR_2333:4	3R	17334917	17334970	0.687316	0.00027451	54
FBgn0192352	intron_dsim_GLEANR_4658:4_dsim_GLEANR_4658:5	3R	17386894	17386959	0.790283	0.0101674	66
FBgn0190020	intron_dsim_GLEANR_2319:1_dsim_GLEANR_2319:2	3R	17486448	17490864	-0.779359	0.0292621	4417
FBgn0190019	intron_dsim_GLEANR_2318:2_dsim_GLEANR_2318:3	3R	17502350	17502479	-0.97542	0.0101028	130
FBgn0192374	intron_dsim_GLEANR_4681:1_dsim_GLEANR_4681:2	3R	17677616	17677679	0.297322	0.024429	64
FBgn0192388	intron_dsim_GLEANR_4696:5_dsim_GLEANR_4696:6	3R	17932983	17933188	0.867099	0.000270033	206
FBgn0192393	intron_dsim_GLEANR_4701:1_dsim_GLEANR_4701:2	3R	17992460	17993125	0.619682	0.0149079	666
FBgn0192393	intron_dsim_GLEANR_4701:4_dsim_GLEANR_4701:5	3R	17994557	17994635	-0.764033	2.10535e-08	79
FBgn0250855	intron_dsim_GLEANR_2291:4_dsim_GLEANR_2291:5	3R	17999482	17999544	-0.793201	0.0151946	63
FBgn0250855	intron_dsim_GLEANR_2291:3_dsim_GLEANR_2291:4	3R	17999747	17999801	-0.965547	0.0116755	55
FBgn0189973	intron_dsim_GLEANR_2273:3_dsim_GLEANR_2273:4	3R	18167631	18167692	-0.37595	0.0479368	62
FBgn0189973	intron_dsim_GLEANR_2273:2_dsim_GLEANR_2273:3	3R	18167993	18168059	-0.870377	0.0186654	67
FBgn0189972	intron_dsim_GLEANR_2272:6_dsim_GLEANR_2272:7	3R	18179381	18179437	0.404352	0.045796	57
FBgn0192439	intron_dsim_GLEANR_4747:4_dsim_GLEANR_4747:5	3R	18429666	18429919	-0.530881	0.0335112	254
FBgn0192439	intron_dsim_GLEANR_4747:5_dsim_GLEANR_4747:6	3R	18430262	18430319	-0.500019	0.00958651	58
FBgn0189938	intron_dsim_GLEANR_2238:1_dsim_GLEANR_2238:2	3R	18674342	18675246	0.916554	4.93001e-05	905
FBgn0192451	intron_dsim_GLEANR_4759:3_dsim_GLEANR_4759:4	3R	18728160	18728222	-0.799779	0.0451249	63
FBgn0192455	intron_dsim_GLEANR_4762:3_dsim_GLEANR_4762:4	3R	18733946	18734002	-0.947901	0.0437991	57
FBgn0189917	intron_dsim_GLEANR_2217:1_dsim_GLEANR_2217:2	3R	18931887	18931935	-0.569467	0.0375105	49
FBgn0192476	intron_dsim_GLEANR_4783:2_dsim_GLEANR_4783:3	3R	19334539	19334686	-0.708036	0.0186019	148
FBgn0189893	intron_dsim_GLEANR_2192:7_dsim_GLEANR_2192:8	3R	19346244	19346308	-0.530873	0.0407432	65
FBgn0192488	intron_dsim_GLEANR_4794:1_dsim_GLEANR_4794:2	3R	19384773	19385565	-0.63387	0.00913146	793
FBgn0189887	intron_dsim_GLEANR_2186:1_dsim_GLEANR_2186:2	3R	19388369	19388423	0.646033	0.040448	55
FBgn0189877	intron_dsim_GLEANR_2175:5_dsim_GLEANR_2175:6	3R	19469786	19469901	-0.424369	0.0124007	116
FBgn0189877	intron_dsim_GLEANR_2175:3_dsim_GLEANR_2175:4	3R	19472080	19472132	-0.661991	0.00112008	53
FBgn0189864	intron_dsim_GLEANR_2163:1_dsim_GLEANR_2163:2	3R	19588368	19592611	0.460983	0.0345636	4244
FBgn0189860	intron_dsim_GLEANR_2158:5_dsim_GLEANR_2158:6	3R	19640961	19641034	-0.920299	0.00215894	74
FBgn0192525	intron_dsim_GLEANR_4831:1_dsim_GLEANR_4831:2	3R	19813013	19813068	-0.63388	0.0324698	56
FBgn0189846	intron_dsim_GLEANR_2143:3_dsim_GLEANR_2143:4	3R	19828021	19828070	-0.665636	0.00149015	50
FBgn0192535	intron_dsim_GLEANR_4842:1_dsim_GLEANR_4842:2	3R	19898988	19899053	-0.751712	0.0337346	66
FBgn0189838	intron_dsim_GLEANR_2133:16_dsim_GLEANR_2133:17	3R	19910503	19910560	-0.596179	0.0182786	58
FBgn0189838	intron_dsim_GLEANR_2133:12_dsim_GLEANR_2133:13	3R	19911980	19912039	-0.630587	0.00141718	60
FBgn0189838	intron_dsim_GLEANR_2133:11_dsim_GLEANR_2133:12	3R	19912261	19912316	-0.558603	0.0493111	56
FBgn0189838	intron_dsim_GLEANR_2133:8_dsim_GLEANR_2133:9	3R	19913858	19913927	-0.741977	0.0265941	70
FBgn0189838	intron_dsim_GLEANR_2133:4_dsim_GLEANR_2133:5	3R	19915077	19915135	0.841058	0.000994502	59
FBgn0192538	intron_dsim_GLEANR_4846:2_dsim_GLEANR_4846:3	3R	19940149	19940525	-0.839451	0.0151476	377
FBgn0189831	intron_dsim_GLEANR_2126:4_dsim_GLEANR_2126:5	3R	20006522	20006577	-0.71921	0.0476846	56
FBgn0189813	intron_dsim_GLEANR_2107:11_dsim_GLEANR_2107:12	3R	20303647	20303707	-0.801996	0.0300515	61
FBgn0192569	intron_dsim_GLEANR_4877:4_dsim_GLEANR_4877:5	3R	20317636	20317693	0.823551	0.0246771	58
FBgn0192583	intron_dsim_GLEANR_4892:1_dsim_GLEANR_4892:2	3R	20469275	20469327	-0.441221	0.0412964	53
FBgn0189792	intron_dsim_GLEANR_2087:1_dsim_GLEANR_2087:2	3R	20521759	20521823	-3.45924	1.33778e-17	65
FBgn0192594	intron_dsim_GLEANR_4902:3_dsim_GLEANR_4902:4	3R	20541597	20541655	-0.771569	0.00293333	59
FBgn0192646	intron_dsim_GLEANR_4953:1_dsim_GLEANR_4953:2	3R	20913389	20913447	-0.740744	0.0193965	59
FBgn0189751	intron_dsim_GLEANR_2047:1_dsim_GLEANR_2047:2	3R	20930285	20930347	0.643284	0.0223463	63
FBgn0192654	intron_dsim_GLEANR_4961:1_dsim_GLEANR_4961:2	3R	20934463	20934529	0.84313	0.000779372	67
FBgn0192656	intron_dsim_GLEANR_4963:2_dsim_GLEANR_4963:3	3R	20938323	20938387	-1.18401	0.0233441	65
FBgn0192682	intron_dsim_GLEANR_4990:1_dsim_GLEANR_4990:2	3R	21336149	21336241	-0.817839	0.0486562	93
FBgn0192688	intron_dsim_GLEANR_4996:3_dsim_GLEANR_4996:4	3R	21507396	21507615	-0.81411	0.00995694	220
FBgn0192706	intron_dsim_GLEANR_5023:8_dsim_GLEANR_5023:9	3R	21723642	21723782	-0.653902	0.0476846	141
FBgn0189663	intron_dsim_GLEANR_1950:2_dsim_GLEANR_1950:3	3R	22378005	22378074	-0.512118	0.0437991	70
FBgn0192753	intron_dsim_GLEANR_5075:4_dsim_GLEANR_5075:5	3R	22605662	22605715	-0.981236	0.00215894	54
FBgn0012844	intron_dsim_GLEANR_1895:1_dsim_GLEANR_1895:2	3R	23214979	23215132	0.619253	0.00119544	154
FBgn0189608	intron_dsim_GLEANR_1893:3_dsim_GLEANR_1893:4	3R	23239310	23239369	-0.514362	0.0197133	60
FBgn0189608	intron_dsim_GLEANR_1893:2_dsim_GLEANR_1893:3	3R	23239478	23239801	-0.703667	0.00216702	324
FBgn0189597	intron_dsim_GLEANR_1882:1_dsim_GLEANR_1882:2	3R	23450809	23450893	-0.674406	0.024563	85
FBgn0189590	intron_dsim_GLEANR_1876:1_dsim_GLEANR_1876:2	3R	23477390	23479245	-0.712477	0.0138426	1856
FBgn0189560	intron_dsim_GLEANR_1847:3_dsim_GLEANR_1847:4	3R	24333142	24333209	-0.937501	2.81207e-05	68
FBgn0192856	intron_dsim_GLEANR_5177:3_dsim_GLEANR_5177:4	3R	24653362	24653629	-0.555126	0.00425199	268
FBgn0192862	intron_dsim_GLEANR_5183:2_dsim_GLEANR_5183:3	3R	24717185	24717247	0.708622	0.000980764	63
FBgn0189368	intron_dsim_GLEANR_1811:9_dsim_GLEANR_1811:10	3R	24816198	24816255	-0.577921	0.0140549	58
FBgn0189368	intron_dsim_GLEANR_1811:6_dsim_GLEANR_1811:7	3R	24816945	24817033	-0.752936	0.0274263	89
FBgn0189368	intron_dsim_GLEANR_1811:4_dsim_GLEANR_1811:5	3R	24817826	24818171	-0.724559	0.000137467	346
FBgn0189368	intron_dsim_GLEANR_1811:3_dsim_GLEANR_1811:4	3R	24818306	24818404	-0.627345	3.18525e-05	99
FBgn0189323	intron_dsim_GLEANR_1807:2_dsim_GLEANR_1807:3	3R	24989182	24989237	-0.453056	0.0112474	56
FBgn0192881	intron_dsim_GLEANR_5202:1_dsim_GLEANR_5202:2	3R	25168591	25168658	0.642157	0.0149766	68
FBgn0192904	intron_dsim_GLEANR_5225:2_dsim_GLEANR_5225:3	3R	25306730	25306788	-0.869381	0.0241319	59
FBgn0192909	intron_dsim_GLEANR_5230:1_dsim_GLEANR_5230:2	3R	25363127	25363388	0.86405	0.0010793	262
FBgn0189128	intron_dsim_GLEANR_1771:6_dsim_GLEANR_1771:7	3R	25410271	25410325	0.977806	0.00641721	55
FBgn0189128	intron_dsim_GLEANR_1771:5_dsim_GLEANR_1771:6	3R	25410561	25410718	0.955895	0.00078051	158
FBgn0189128	intron_dsim_GLEANR_1771:3_dsim_GLEANR_1771:4	3R	25411192	25411570	0.710696	0.0246771	379
FBgn0188819	intron_dsim_GLEANR_1740:1_dsim_GLEANR_1740:2	3R	25666962	25667625	0.7356	0.0485406	664
FBgn0188786	intron_dsim_GLEANR_1737:3_dsim_GLEANR_1737:4	3R	25688911	25688966	0.499779	0.00757213	56
FBgn0188786	intron_dsim_GLEANR_1737:1_dsim_GLEANR_1737:2	3R	25689431	25689522	0.572102	0.0267958	92
FBgn0188775	intron_dsim_GLEANR_1736:3_dsim_GLEANR_1736:4	3R	25690549	25690604	-0.461114	0.0464576	56
FBgn0192938	intron_dsim_GLEANR_5267:4_dsim_GLEANR_5267:5	3R	25746086	25746146	-1.61785	0.0454469	61
FBgn0188726	intron_dsim_GLEANR_1731:2_dsim_GLEANR_1731:3	3R	25866285	25866346	-0.846741	0.00823562	62
FBgn0192943	intron_dsim_GLEANR_5271:3_dsim_GLEANR_5271:4	3R	25902594	25902654	-0.903473	0.00359073	61
FBgn0192945	intron_dsim_GLEANR_5273:1_dsim_GLEANR_5273:2	3R	25906493	25906550	-1.83069	3.08203e-08	58
FBgn0192968	intron_dsim_GLEANR_5296:1_dsim_GLEANR_5296:2	3R	26192229	26192288	-0.435782	0.0426692	60
FBgn0192973	intron_dsim_GLEANR_5301:2_dsim_GLEANR_5301:3	3R	26274438	26274504	0.656769	0.0495705	67
FBgn0188217	intron_dsim_GLEANR_1682:9_dsim_GLEANR_1682:10	3R	26565626	26565682	-0.599792	0.0166749	57
FBgn0188162	intron_dsim_GLEANR_1676:11_dsim_GLEANR_1676:12	3R	26674455	26674512	0.97997	0.00043365	58
FBgn0188162	intron_dsim_GLEANR_1676:10_dsim_GLEANR_1676:11	3R	26674872	26674934	0.54077	0.0434125	63
FBgn0188162	intron_dsim_GLEANR_1676:9_dsim_GLEANR_1676:10	3R	26675077	26675133	0.906962	0.000310052	57
FBgn0188162	intron_dsim_GLEANR_1676:8_dsim_GLEANR_1676:9	3R	26675391	26675445	0.587995	0.0105025	55
FBgn0192990	intron_dsim_GLEANR_5318:1_dsim_GLEANR_5318:2	3R	26690318	26694709	-0.607594	0.0238739	4392
FBgn0192992	intron_dsim_GLEANR_5320:1_dsim_GLEANR_5320:2	3R	26725552	26725620	-0.561425	0.00173661	69
FBgn0193023	intron_dsim_GLEANR_5350:1_dsim_GLEANR_5350:2	3R	27183893	27184382	0.672752	0.0190931	490
FBgn0193025	intron_dsim_GLEANR_5352:1_dsim_GLEANR_5352:2	3R	27186580	27186634	-0.698671	0.000194452	55
FBgn0187938	intron_dsim_GLEANR_1654:6_dsim_GLEANR_1654:7	3R	27195056	27195113	-1.70862	1.99658e-05	58
FBgn0193027	intron_dsim_GLEANR_5355:4_dsim_GLEANR_5355:5	3R	27217387	27217444	-0.620127	0.00211864	58
FBgn0193028	intron_dsim_GLEANR_5356:16_dsim_GLEANR_5356:17	3R	27231322	27231386	-0.675686	0.00215894	65
FBgn0193031	intron_dsim_GLEANR_5359:1_dsim_GLEANR_5359:2	3R	27248703	27248829	-0.773909	0.012532	127
FBgn0188176	intron_dsim_GLEANR_16773:1_dsim_GLEANR_16773:2	X	1230167	1230276	-0.77477	0.00523171	110
FBgn0188207	intron_dsim_GLEANR_16809:2_dsim_GLEANR_16809:3	X	1757975	1758036	-0.725049	0.0300515	62
FBgn0188231	intron_dsim_GLEANR_16834:5_dsim_GLEANR_16834:6	X	2302935	2303000	0.812486	0.0300515	66
FBgn0188231	intron_dsim_GLEANR_16834:6_dsim_GLEANR_16834:7	X	2303116	2303184	0.937874	0.000687141	69
FBgn0188231	intron_dsim_GLEANR_16834:7_dsim_GLEANR_16834:8	X	2303348	2303411	0.488813	0.0403645	64
FBgn0068687	intron_dsim_GLEANR_16845:8_dsim_GLEANR_16845:9	X	2700882	2701019	-0.575431	0.00359073	138
FBgn0188260	intron_dsim_GLEANR_16864:2_dsim_GLEANR_16864:3	X	2976502	2976642	-0.721704	0.000453363	141
FBgn0187925	intron_dsim_GLEANR_16523:2_dsim_GLEANR_16523:3	X	3250236	3250299	-0.964304	0.000224738	64
FBgn0187912	intron_dsim_GLEANR_16511:3_dsim_GLEANR_16511:4	X	3529175	3529334	-0.605406	0.026562	160
FBgn0187889	intron_dsim_GLEANR_16490:6_dsim_GLEANR_16490:7	X	4076660	4076723	0.904998	0.0193515	64
FBgn0187887	intron_dsim_GLEANR_16489:2_dsim_GLEANR_16489:3	X	4086003	4086071	-0.502916	0.0329369	69
FBgn0187880	intron_dsim_GLEANR_16482:1_dsim_GLEANR_16482:2	X	4275654	4275781	0.759093	0.0405752	128
FBgn0188342	intron_dsim_GLEANR_16941:1_dsim_GLEANR_16941:2	X	4428622	4428682	-0.843206	0.00453839	61
FBgn0188369	intron_dsim_GLEANR_16967:3_dsim_GLEANR_16967:4	X	4686940	4687299	-0.781072	0.0191108	360
FBgn0188392	intron_dsim_GLEANR_16988:2_dsim_GLEANR_16988:3	X	5091665	5091728	-0.528227	0.00517477	64
FBgn0187811	intron_dsim_GLEANR_16418:3_dsim_GLEANR_16418:4	X	5232059	5232133	-0.694563	0.00148521	75
FBgn0187808	intron_dsim_GLEANR_16415:6_dsim_GLEANR_16415:7	X	5250261	5250335	-0.671055	0.0375105	75
FBgn0188433	intron_dsim_GLEANR_17031:1_dsim_GLEANR_17031:2	X	5872380	5872448	1.11108	4.38728e-09	69
FBgn0187778	intron_dsim_GLEANR_16381:2_dsim_GLEANR_16381:3	X	6219388	6219872	-0.465499	0.000962906	485
FBgn0188452	intron_dsim_GLEANR_17049:1_dsim_GLEANR_17049:2	X	6253501	6253885	-0.526484	0.00886983	385
FBgn0068584	intron_dsim_GLEANR_16373:7_dsim_GLEANR_16373:8	X	6287211	6287273	-0.791617	0.011215	63
FBgn0188476	intron_dsim_GLEANR_17072:2_dsim_GLEANR_17072:3	X	6590064	6590163	-0.644644	0.00630358	100
FBgn0085973	intron_dsim_GLEANR_17076:2_dsim_GLEANR_17076:3	X	6625370	6625434	-0.601564	0.0444092	65
FBgn0085973	intron_dsim_GLEANR_17076:3_dsim_GLEANR_17076:4	X	6625556	6625613	-0.965521	0.000100436	58
FBgn0187731	intron_dsim_GLEANR_16330:6_dsim_GLEANR_16330:7	X	6985380	6985446	-0.705606	0.0463892	67
FBgn0188500	intron_dsim_GLEANR_17096:4_dsim_GLEANR_17096:5	X	7108834	7109014	0.596043	0.0377065	181
FBgn0187719	intron_dsim_GLEANR_16319:1_dsim_GLEANR_16319:2	X	7212977	7213050	0.970355	7.39456e-05	74
FBgn0187715	intron_dsim_GLEANR_16315:3_dsim_GLEANR_16315:4	X	7246839	7246908	-0.597753	0.0476472	70
FBgn0187715	intron_dsim_GLEANR_16315:2_dsim_GLEANR_16315:3	X	7247067	7247124	-0.817839	0.0186019	58
FBgn0187713	intron_dsim_GLEANR_16313:7_dsim_GLEANR_16313:8	X	7270407	7270474	0.665341	0.0337346	68
FBgn0187713	intron_dsim_GLEANR_16313:2_dsim_GLEANR_16313:3	X	7273220	7273321	0.630781	0.0183122	102
FBgn0187657	intron_dsim_GLEANR_16256:1_dsim_GLEANR_16256:2	X	8281881	8284025	-0.467045	0.00548066	2145
FBgn0188571	intron_dsim_GLEANR_17162:2_dsim_GLEANR_17162:3	X	8385913	8385985	-0.805579	0.010369	73
FBgn0188596	intron_dsim_GLEANR_17186:1_dsim_GLEANR_17186:2	X	8698494	8701065	1.0404	0.0100767	2572
FBgn0188605	intron_dsim_GLEANR_17196:2_dsim_GLEANR_17196:3	X	8831472	8831532	-0.491497	0.0172327	61
FBgn0188614	intron_dsim_GLEANR_17205:10_dsim_GLEANR_17205:11	X	8926410	8926481	-0.754309	0.0156087	72
FBgn0187619	intron_dsim_GLEANR_16213:1_dsim_GLEANR_16213:2	X	8974557	8974620	-1.36639	1.65632e-05	64
FBgn0188623	intron_dsim_GLEANR_17213:6_dsim_GLEANR_17213:7	X	9004185	9009099	-0.75484	0.0148421	4915
FBgn0187598	intron_dsim_GLEANR_16191:5_dsim_GLEANR_16191:6	X	9145874	9145951	-0.696288	0.0463337	78
FBgn0188630	intron_dsim_GLEANR_17220:1_dsim_GLEANR_17220:2	X	9170818	9171222	0.474805	0.0124863	405
FBgn0187583	intron_dsim_GLEANR_16177:1_dsim_GLEANR_16177:2	X	9350744	9350808	-1.0727	9.73677e-05	65
FBgn0188649	intron_dsim_GLEANR_17239:3_dsim_GLEANR_17239:4	X	9478057	9478115	0.542752	0.0432314	59
FBgn0187572	intron_dsim_GLEANR_16167:4_dsim_GLEANR_16167:5	X	9584161	9584217	-0.585989	0.024603	57
FBgn0187557	intron_dsim_GLEANR_16151:3_dsim_GLEANR_16151:4	X	9907351	9907435	-0.75233	0.00251629	85
FBgn0188691	intron_dsim_GLEANR_17278:1_dsim_GLEANR_17278:2	X	10171711	10171811	0.754864	0.0192193	101
FBgn0188696	intron_dsim_GLEANR_17282:5_dsim_GLEANR_17282:6	X	10195126	10195191	-0.482265	0.0407432	66
FBgn0018225	intron_dsim_GLEANR_16127:3_dsim_GLEANR_16127:4	X	10347316	10348110	-0.525294	0.0127737	795
FBgn0187503	intron_dsim_GLEANR_16093:2_dsim_GLEANR_16093:3	X	11157100	11157224	-0.82962	0.00638138	125
FBgn0187484	intron_dsim_GLEANR_16072:1_dsim_GLEANR_16072:2	X	11454211	11457942	-0.705619	0.0158437	3732
FBgn0188757	intron_dsim_GLEANR_17341:1_dsim_GLEANR_17341:2	X	11553926	11554136	1.03903	0.00248322	211
FBgn0188773	intron_dsim_GLEANR_17358:2_dsim_GLEANR_17358:3	X	11855751	11856235	0.587483	0.0113578	485
FBgn0187436	intron_dsim_GLEANR_16021:1_dsim_GLEANR_16021:2	X	12170112	12170178	-1.22534	0.0181686	67
FBgn0187427	intron_dsim_GLEANR_16011:2_dsim_GLEANR_16011:3	X	12293506	12293583	-0.550318	6.22799e-06	78
FBgn0187418	intron_dsim_GLEANR_16003:5_dsim_GLEANR_16003:6	X	12491479	12491553	-0.842287	0.00078051	75
FBgn0187413	intron_dsim_GLEANR_15999:2_dsim_GLEANR_15999:3	X	12539983	12540045	-0.572245	0.0173882	63
FBgn0187409	intron_dsim_GLEANR_15995:1_dsim_GLEANR_15995:2	X	12572050	12572107	-0.841795	7.13649e-05	58
FBgn0187380	intron_dsim_GLEANR_15966:1_dsim_GLEANR_15966:2	X	12901369	12901440	-0.619437	0.0477035	72
FBgn0187375	intron_dsim_GLEANR_15961:1_dsim_GLEANR_15961:2	X	12975167	12975241	1.1261	0.0114263	75
FBgn0188913	intron_dsim_GLEANR_17488:1_dsim_GLEANR_17488:2	X	13448778	13448961	-0.76393	0.0151476	184
FBgn0188950	intron_dsim_GLEANR_17524:1_dsim_GLEANR_17524:2	X	14092928	14092985	-0.998988	0.00202491	58
FBgn0187245	intron_dsim_GLEANR_15829:2_dsim_GLEANR_15829:3	X	14979847	14979921	0.526484	0.0293643	75
FBgn0187240	intron_dsim_GLEANR_15824:6_dsim_GLEANR_15824:7	X	15029985	15030053	-0.654378	0.0407432	69
FBgn0187233	intron_dsim_GLEANR_15817:2_dsim_GLEANR_15817:3	X	15093739	15093942	-0.672543	0.0266046	204
FBgn0189020	intron_dsim_GLEANR_17591:1_dsim_GLEANR_17591:2	X	15159393	15159471	-0.595271	0.0211628	79
FBgn0195738	intron_dsim_GLEANR_8149:2_dsim_GLEANR_8149:3	4	153075	153130	-1.14534	0.0199659	56
FBgn0195740	intron_dsim_GLEANR_8152:11_dsim_GLEANR_8152:12	4	233223	233270	1.33036	2.10535e-08	48
FBgn0195725	intron_dsim_GLEANR_8126:4_dsim_GLEANR_8126:5	4	297394	297447	0.653964	0.0144705	54
FBgn0195751	intron_dsim_GLEANR_8165:1_dsim_GLEANR_8165:2	4	574939	574996	-0.652959	0.0151476	58
FBgn0069472	intron_dsim_GLEANR_8111:15_dsim_GLEANR_8111:16	4	695355	696271	0.656826	0.0190399	917
FBgn0195706	intron_dsim_GLEANR_8104:1_dsim_GLEANR_8104:2	4	832523	833155	0.800187	0.0267958	633
FBgn0195705	intron_dsim_GLEANR_8103:10_dsim_GLEANR_8103:11	4	876209	876265	0.568396	0.0455186	57
FBgn0195705	intron_dsim_GLEANR_8103:9_dsim_GLEANR_8103:10	4	876390	876550	0.669879	0.0169319	161
FBgn0195704	intron_dsim_GLEANR_8101:7_dsim_GLEANR_8101:8	4	921809	922836	0.610907	0.0378888	1028
